# Supplementary material
Source: PubMed Central journal article supplement (PMC6802271)
Supplement: jama-322-1486-s001.pdf [file jama-322-1486-s001.pdf]

## Supplementary Online Content

Sayón-Orea C, Razquin C, Bulló M, et al. Effect of a nutritional and behavioral intervention on energy-reduced Mediterranean diet adherence among patients with metabolic syndrome [published October 15, 2019]. *JAMA*. doi:10.1001/jama.2019.14630

### **Supplement 1.** Trial protocol

This supplementary material has been provided by the authors to give readers additional information about their work.

1  
2  
3  
4  
5  
6  
7  
8  
9  
10  
11  
12  
13  
14  
15  
16  
17  
18  
19  
20  
21  
22  
23  
24

**EFFECT OF AN ENERGY-RESTRICTED MEDITERRANEAN DIET,  
PHYSICAL ACTIVITY AND BEHAVIORAL TREATMENT ON THE  
PRIMARY PREVENTION OF CARDIOVASCULAR DISEASE**

**THE PREDIMED-PLUS TRIAL**

**RESEARCH PLAN**

**January 2014**

25  
26  
27  
28  
29  
30  
31  
32  
33  
34  
35  
36  
37  
38  
39  
40  
41  
42  
43  
44  
45  
46  
47  
48  
49

## Table of contents

|                                                      |           |
|------------------------------------------------------|-----------|
| <b>Amendments to the protocol after January 2014</b> | <b>3</b>  |
| <b><u>2014 PROTOCOL</u></b>                          |           |
| <b>Abstract</b>                                      | <b>4</b>  |
| <b>Background</b>                                    | <b>6</b>  |
| <b>Hypothesis</b>                                    | <b>11</b> |
| <b>Objectives</b>                                    | <b>11</b> |
| <b>Methodology</b>                                   | <b>13</b> |
| <b>Statistical Analysis Plan</b>                     | <b>50</b> |
| <b>Strengths and limitations</b>                     | <b>54</b> |
| <b>Committees and governance</b>                     | <b>55</b> |
| <b>Sources of funding and administrative issues</b>  | <b>56</b> |
| <b>References</b>                                    | <b>57</b> |
| <b>Annex I (sub-studies)</b>                         | <b>71</b> |
| <b>Annex II (participating centers)</b>              | <b>72</b> |

50

51 **AMENDMENTS TO THE PROTOCOL AFTER JANUARY 2014**

- 52 1. In January 2014 the Steering Committee following the advice of the Data Safety  
 53 and Monitoring Board decided to amend the Protocol and omit the 1.5 kg weight  
 54 loss criterion to be achieved during the run-in period. Such change only affected  
 55 the first 70 participants who were eligible and randomized in 2 vanguard centers.
- 56 2. September-July 2014. Initially, we decided to provide 500 g per month at no cost of  
 57 nuts to each participant during the intervention in order to reinforce adherence to  
 58 the Mediterranean diet in both arms of the trial. However, due to lack of economic  
 59 resources, only participants included in the pilot study recruited in 2 vanguard  
 60 centers up to July 2014 received 250 g of free nuts (125g of pistachios and 125g of  
 61 almonds per month) along with the recommendation to consume a total monthly  
 62 amount of 500g. Subsequently, all trial participants received during the follow-up  
 63 125g of almonds per month out of the total recommended amount of 500g.
- 64 3. Four coordinated grants to fund the trial were received from the Instituto de Salud  
 65 Carlos III (Madrid) for the periods 2014-2016 and 2017-2019 (Coordinator J. Salas-  
 66 Salvado) and for the periods 2015-2017 and 2018-2020 (Coordinator J. Vidal).
- 67 4. November 2014. In order to increase the possibility of meeting target numbers of  
 68 recruits by December 2017, in November 2014 the Steering Committee accepted  
 69 the inclusion of three additional recruiting centers (see below).

|    |                          |                           |                                                             |
|----|--------------------------|---------------------------|-------------------------------------------------------------|
| 21 | Jesús Vioque López       | vioque@umh.es             | Universidad Miguel Hernández, Sant Joan d'Alacant, Alicante |
| 22 | Miguel Delgado Rodríguez | mdelgado@ujaen.es         | Universidad de Jaén, Jaén                                   |
| 23 | Vicente Martin           | vicente.martin@unileon.es | Universidad de León, León                                   |

70

- 71 5. December 2016. Dr. Francisco Tinahones (Hospital de Málaga) was incorporated  
 72 as the seventh member of the Steering Committee.
- 73 6. February 2018: Dr. Julia Warnberg ([jwarnberg@uma.es](mailto:jwarnberg@uma.es), Nursing School) replaced  
 74 the Principal Investigator of the recruitment center at Malaga University (Preventive  
 75 Medicine, Medical School), Prof. Enrique Gómez-Gracia, who continued in the trial  
 76 as Principal Investigator of a new Support Group (A8).

|    |                      |                        |                                                           |
|----|----------------------|------------------------|-----------------------------------------------------------|
| A8 | Enrique Gómez-Gracia | egomezgracia@gmail.com | Preventive Medicine, Medical School, University of Malaga |
|----|----------------------|------------------------|-----------------------------------------------------------|

77

78 **ABSTRACT**

79 In the 21st century we are witnessing an **alarming increase in overweight and**  
80 **obesity**. In **Spain, over 60%** of adults are **overweight or obese** and the prevalence of  
81 adult **abdominal obesity exceeds 35%** (Gutiérrez-Fisac et al., 2012). The increase in  
82 morbid obesity is especially worrying (Basterra-Gortari et al., 2011) because the  
83 medium-to-long-term consequences for the **risk of cardiovascular** disease (CVD) and  
84 other causes of death or illness can be **catastrophic**.

85 Observational studies have shown that all-cause mortality increases progressively  
86 in parallel with adiposity and that the risk of **cardiovascular mortality** is especially  
87 high (Berrington de González et al., 2010). However, a meta-analysis published in  
88 early 2013 (Flegal, 2013) raised considerable controversy by much downgrading the  
89 consequences of overweight and moderate obesity. The results of this meta-analysis  
90 could be explained by the existence of biases, such as unusual definitions for  
91 categories of overweight, tobacco as a confounding factor, inverse causality, and the  
92 exclusion of relevant studies (Tobias and Hu, 2013). Nevertheless, the controversy  
93 persists and will probably do so well into the next few decades. Doubts such as these  
94 will only be solved by randomized intervention trials (Hernán and Taubman, 2008).  
95 Thus, clinical studies are needed to determine whether **intentional weight loss**  
96 reduces cardiovascular mortality and CVD incidence.

97 In the PREDIMED-PLUS trial we will evaluate the safety and effectiveness of a  
98 multifaceted intervention program for alleviating excessive cardiovascular morbidity  
99 and mortality in overweight and obese individuals. The study's aim is to determine the  
100 effect on CVD morbidity and mortality of an intensive weight loss intervention program  
101 based on an energy-restricted traditional Mediterranean diet, increased physical activity  
102 and behavioral therapy in comparison with an intervention based on standard dietary  
103 advice (energy-unrestricted Mediterranean diet) and traditional health care for CVD  
104 prevention. We hypothesize that an intensive lifestyle intervention program aimed at  
105 weight loss and based on the traditional Mediterranean diet is a sustainable long-term  
106 approach for achieving weight loss in overweight and obese adults and that the lifestyle  
107 changes achieved will have a beneficial effect on cardiovascular morbidity and  
108 mortality (Estruch et al., 2013; Shai et al., 2008). This study may provide a useful tool  
109 for tackling excess morbidity and mortality associated with overweight and obesity.

110

111 **Objectives**

112 The PREDIMED-PLUS trial will evaluate the effect on primary CVD prevention of an  
113 intensive intervention program comprising a 17-item energy-restricted Mediterranean

114 diet with specific weight-loss goals, physical activity promotion and behavioral support  
115 (intervention group) in comparison to a control group using Mediterranean diet  
116 recommendations (comprising a 14-item energy-unrestricted Mediterranean diet) but  
117 without advice to increase physical activity or reduce energy intake (Schröder et al.,  
118 2011) (control group). The diet that will be assigned to the control group has previously  
119 been shown to be effective for CVD prevention in the PREDIMED trial (Estruch et al.,  
120 2013). The main outcomes will be clinical cardiovascular events (myocardial infarction,  
121 stroke or cardiovascular death) as defined in the PREDIMED trial (Martinez-Gonzalez  
122 et al., 2012).

123 The main objective of PREDIMED-PLUS is to evaluate, in comparison with a **control**  
124 **group** given non-intensive, energy-unrestricted dietary advice (also Mediterranean-  
125 type), the effect of an **intensive lifestyle intervention** comprising an **energy-**  
126 **restricted Mediterranean diet**, increased physical activity and behavioral support on:

127

128 1. The incidence of **cardiovascular events** (non-fatal myocardial infarction, non-fatal  
129 stroke, or cardiovascular death).

130

131 2. **Weight loss** and long-term maintenance of weight-loss.

132

133 The secondary objectives are to determine whether an intensive weight-loss-  
134 oriented lifestyle intervention program has a beneficial effect to reduce waist  
135 circumference and the following overweight- and obesity-related conditions: acute  
136 coronary syndromes with or without coronary revascularization, heart failure, atrial  
137 fibrillation, peripheral artery disease, venous thrombosis, type-2 diabetes mellitus and  
138 its complications, overall incidence of cancer, specific cancers in main cancer sites  
139 (breast, colorectal, prostate, lung and stomach), osteoporotic fractures, gallstone  
140 disease, symptomatic gout, neurodegenerative disorders (dementia and Parkinson's  
141 disease), unipolar depression and eating behavior disorders. We will also determine  
142 the effect of the intervention on the following intermediate markers: nutrient intake and  
143 overall dietary pattern, systolic and diastolic blood pressure, blood lipids, fasting  
144 glucose level, kidney function, uric acid level, the percentage of individuals requiring  
145 anti-hypertensive, anti-diabetic or lipid-lowering medication, C-reactive protein levels,  
146 hemoglobin A1C levels, liver function, ECG traits, cognitive function, quality of life, and  
147 psychopathological symptoms.

148

149

150 **Methodology**

151 We are conducting a randomized, multicenter **field trial** aimed at the primary  
 152 prevention of CVD in overweight or obese adults with metabolic syndrome using an  
 153 intensive intervention program based on an energy-restricted Mediterranean diet,  
 154 increased physical activity, and behavioral support and a control group given advice on  
 155 an *ad libitum* Mediterranean diet for the prevention of cardiovascular morbidity and  
 156 mortality in accordance with the PREDIMED trial. We stress to participants the  
 157 importance of attending medical visits and provide them with general written  
 158 recommendations on lifestyle for the management of the metabolic syndrome. This  
 159 new trial, the planning and design of which is outlined in this paper, is called  
 160 **PREDIMED-PLUS.**

161 Involved in this new multicenter trial are 20 recruiting centers that aim to recruit a  
 162 total of **6,000 participants**, of whom **3,000** will be assigned to the intensive intervention  
 163 group and **3,000** to the control group. Recruitment takes place between 2013 and  
 164 2017. The intervention will last at least 6 years and the median follow-up time for the  
 165 clinical endpoints is expected to be 8 years. The results of the trial, including  
 166 anthropometric changes and impact on major obesity-related disorders, are expected  
 167 to be highly applicable to public healthcare since they will provide a better prognosis for  
 168 overweight and obese adults. The results are also expected to be highly efficient since  
 169 they should provide a non-pharmacological approach to the prevention of the main  
 170 cause of mortality and one of the leading causes of loss of disability-adjusted life years  
 171 (Lozano et al., 2012).

172  
 173 **BACKGROUND**

174 The **global overweight and obesity epidemic** is increasing at an alarming rate.  
 175 Now a global public health crisis, it affects over 50% of the adult population. Between  
 176 1980 and 2008, worldwide obesity prevalence almost **doubled** (Finucane et al., 2011;  
 177 Malik et al., 2013). In Spain, the **prevalence of adult abdominal obesity is over 35%**  
 178 and **over 60%** of the adult population is overweight or obese (Gutiérrez-Fisac et al.,  
 179 2012). Moreover, there is a particularly worrying increase in morbid obesity (Basterra-  
 180 Gortari et al., 2011). The medium-to-long-term consequences of obesity on the risk of  
 181 CVD and death are **devastating** and have the capacity to both **render the health**  
 182 **system unsustainable** and curtail economic growth. Urgent priority must be given to  
 183 finding solutions based on the best scientific evidence available.

184 The link between obesity and mortality appears to diminish with age. However, if  
 185 this were true, it would be difficult to recommend weight loss for older populations. This

186 notion has been challenged by observational epidemiological studies that, after  
187 generational and cohort confusion are adequately controlled, suggest the opposite, i.e.,  
188 that with advancing age the link between obesity and mortality becomes even stronger  
189 (Masters, 2013). A meta-analysis of observational studies published in 2013 (Flegal,  
190 2013) raised controversy by considerably downgrading the consequences of  
191 overweight and moderate obesity. However, as Tobias and Hu (2013) have argued, the  
192 conclusions of Flegal's meta-analysis can probably be explained by the existence of  
193 biases, such as unusual definitions for categories of overweight, tobacco as a  
194 confounding factor, inverse causality, and the exclusion of relevant studies. This issue  
195 will only be solved by randomized clinical trials (Hernán and Taubman, 2008).  
196 However, the controversy is likely to continue well into the next few decades until the  
197 results of clinical intervention studies are available that overcome the limitations and  
198 inherent bias of the observational designs that have evaluated the link between  
199 overweight or obesity and the incidence of serious clinical events or mortality in initially  
200 healthy individuals. Observational studies with a better control of bias have found that  
201 all-cause mortality increases progressively as adiposity outside the normal weight  
202 range—measured by body mass index (BMI, defined as weight in kilograms divided by  
203 the square of height in meters)—increases, and that this risk is especially high for  
204 **cardiovascular mortality** (Berrington de González et al., 2010). An increase in body  
205 weight is associated not only with higher mortality but also with greater morbidity due to  
206 CVD (Ni Mhurchu et al., 2004; Song et al., 2004; Flint et al., 2010); greater risk of  
207 developing some types of cancer, diabetes and depression (Luppino et al., 2010); and  
208 poorer cognitive function (Gunstad et al., 2010). Large-scale randomized studies with  
209 robust designs are needed to obtain best-quality evidence.

210 Expert panels set up by the National Institutes of Health and the World Health  
211 Organization recommend that overweight and obese adults with comorbid conditions  
212 should lose 10% of their initial weight and that a lifestyle intervention program should  
213 be the primary treatment (National Institute of Health, 1998; World Health Organization,  
214 1998). Moreover, according to the American Dietetic Association, a weight-loss-  
215 oriented intensive lifestyle intervention program should include an energy-restricted  
216 diet, physical activity and behavioral therapy. The only randomized trial that has  
217 addressed the long-term effect of an intensive weight-loss lifestyle program in obese  
218 adults on CVD and mortality is the Look AHEAD study (Ryan, 2003). This trial, which  
219 comprised 5,145 participants (Rejeski et al., 2012), ended prematurely in October 2012  
220 due to lack of efficiency (Look AHEAD Research Group, 2013). The trial included only  
221 diabetic subjects and used a low-fat diet (<30% of total energy intake with <10% from



222 saturated fat). To some extent this is opposite to the Mediterranean diet used in the  
223 PREDIMED trial (Zazpe et al., 2008; Martínez-González et al., 2012; Estruch et al.,  
224 2013), which is rich in vegetable fats such as healthful virgin olive oil and nuts. In  
225 recent years, scientific associations have recommended low-fat diets that contribute  
226 less than 30% of energy in the form of fat as the most suitable way to promote general  
227 health and weight loss. The high energy density and high palatability of high-fat foods  
228 are feared to produce potentially adverse effects on body weight and cardiovascular  
229 health (National Institute of Health, 2000). However, the discontinuation of the Look  
230 AHEAD trial due to futility, the inefficiency of the Women's Health Initiative Dietary  
231 Modification Trial (Look Ahead Research Group, 2013; Howard, 2006), and the  
232 favorable results of the PREDIMED (Estruch et al., 2013) and DIRECT studies (Shai et  
233 al., 2008) provide powerful arguments against approaches based on low-fat diets.

234 Although diets that recommend complex carbohydrates, a reduction in fat intake  
235 and energy restriction to produce weight loss are generally accepted, there is no clear  
236 evidence that dietary fat is associated with a greater increase in weight (Willett, 2001;  
237 Nordmann et al., 2006; Larsen et al., 2010; Hu et al., 2012; Bueno et al., 2013). One  
238 dietary paradigm that is different from the low-fat diet and that can be more useful for  
239 developing and implementing programs aimed at achieving prolonged weight loss and  
240 improving the metabolic alterations associated with overweight and obesity is the  
241 **traditional Mediterranean diet**. This dietary pattern is rich in fat from vegetable  
242 sources (virgin olive oil and nuts) and includes an abundance of minimally processed  
243 plant foods (vegetables, fruits, whole grains and legumes), low consumption of meat  
244 (especially red and processed meats), moderate consumption of fish and wine (which  
245 is usually consumed with meals) and frugal meals. The high fat contents of the  
246 traditional Mediterranean diet make the diet more palatable and therefore more  
247 acceptable and easily sustainable in the long term.

248 In its 2010 edition, the Dietary Guidelines for Americans recognized the traditional  
249 Mediterranean diet, together with the DASH diet, as a healthy diet for the prevention of  
250 CVD, although when the recommendation was made, randomized clinical trials with  
251 regard to the primary prevention of major clinical events as the main outcome had not  
252 yet been conducted. This was confirmed by the results of the PREDIMED trial on the  
253 primary prevention of cardiovascular disease conducted in Spain between 2003 and  
254 2010 (Estruch et al., 2013).

255 With regard to the weight-loss properties of the traditional Mediterranean diet, in a  
256 meta-analysis of randomized trials, allocation to a Mediterranean diet in comparison  
257 with control diets showed a small but significant effect on body weight reduction (mean

258 differences: -1.75 kg, CI 95%: -2.86 a -0.64 kg). This effect was doubled when the  
 259 Mediterranean diet was energy-restricted (Esposito et al., 2011). Another meta-  
 260 analysis of observational studies (Sofi et al., 2010) found that greater adherence to the  
 261 Mediterranean diet was associated with significant reductions in total mortality,  
 262 cardiovascular mortality, mortality due to cancer, the incidence of non-fatal  
 263 cardiovascular events, and the risk of neurodegenerative illnesses. A subsequent  
 264 update of the meta-analysis of the Mediterranean diet and CVD reported a 13% relative  
 265 reduction in risk for every two-point increase in adherence to the Mediterranean diet  
 266 (scale 0–9) after identifying and treating sources of heterogeneity (Martínez-Gonzalez  
 267 and Bes-Rastrollo, 2014).

268 The **PREDIMED (PREvención con Dieta MEDiterránea)** trial, which included  
 269 7,447 participants over an average of five years, was the largest nutritional intervention  
 270 **trial** ever conducted in Europe. PREDIMED showed that, in comparison with advice on  
 271 a low-fat diet, a high-fat **Mediterranean diet** supplemented with extra-virgin olive oil or  
 272 mixed nuts implemented in a setting of primary cardiovascular prevention resulted in a  
 273 **30% reduction in CVD events** after intervention for a median of 4.8 years (Estruch et  
 274 al., 2013). **PREDIMED** is recognized worldwide as a landmark study that marks a  
 275 turning point in the **prevention of chronic diseases**. The effective reduction in  
 276 cardiovascular events when the **Mediterranean diet** was used in a randomized trial  
 277 provides the best-possible scientific evidence for preventing **CVD, the main cause of**  
 278 **death in the world**. We should also point out that the **PREDIMED** diets were *ad*  
 279 *libitum*, increased physical activity was not promoted, and no counsel to lose weight  
 280 was given.

281 It has been postulated that the link between adherence to the traditional  
 282 Mediterranean diet and the risk of CVD can be mediated by several mechanisms,  
 283 including a reduction in low degree inflammation (Chrysohoou et al., 2004; Esposito et  
 284 al., 2004; Mena et al., 2009; Camargo et al., 2011; Urpi-Sarda et al., 2012; Meneses et  
 285 al., 2012), higher levels of adiponectin (Detopoulou et al., 2010; Razquin et al., 2010),  
 286 lower coagulability (Chrysohoou et al., 2004; Pérez-Jiménez et al., 2006; Pérez-  
 287 Jiménez et al., 2002), improved endothelial function (Esposito et al., 2004; Ruano et  
 288 al., 2005; Fuentes et al., 2008), lower oxidative stress (Dai et al., 2008; Chrysohoou et  
 289 al., 2011; Razquin et al., 2009), a lower concentration of atherogenic lipoproteins  
 290 (Jones et al., 2012), lower levels of oxidized LDL particles (Fito et al., 2007), and a  
 291 lower uptake of oxidized LDL by macrophages (Moreno et al., 2008). Moreover, the two  
 292 foods supplemented in PREDIMED (extra-virgin olive oil and nuts) also have beneficial  
 293 biological properties. Extra-virgin olive oil has a healthy fatty acid profile and contains

294 numerous bioactive phenolic compounds (Pérez-Jiménez et al., 2006; Covas et al.,  
295 2009; López-Miranda et al., 2010). The phenolic compounds of olive oil have anti-  
296 inflammatory properties (Fito et al., 2008), beneficially impact the lipid profile (Benkhalti  
297 et al., 2002; Covas et al., 2006), improve oxidative stress markers (Covas et al., 2006),  
298 have a platelet antiaggregant effect (de Roos et al., 2011; Fito et al., 2008), and  
299 stimulate mitochondrial biogenesis (Zhu et al., 2010). Nuts also have a healthy fatty  
300 acid profile, based on mono- and polyunsaturated fatty acids, and contain minerals,  
301 vitamins and other antioxidant bioactives, essential amino acids, fiber, and phytosterols  
302 (Ros, 2009). The consumption of nuts has been associated with lower levels of total  
303 cholesterol, LDL and non-HDL cholesterol, and apolipoprotein B-100 (Li et al., 2009;  
304 Sabaté et al., 2010), and lower inflammation (Jiang et al., 2006). Nuts also have an  
305 antioxidant effect, benefit heart rate and improve platelet aggregation and endothelial  
306 function (Ros, 2009; Defilippis et al., 2010). All of these mechanisms explain the  
307 antiatherogenic effect of a Mediterranean diet that is rich in nuts and extra-virgin olive  
308 oil. In fact, in the PREDIMED trial a strong protective effect against peripheral artery  
309 disease was observed (Ruiz-Canela et al., 2014). In a sub-study of the PREDIMED trial  
310 we also observed that both a Mediterranean diet enriched with nuts and a  
311 Mediterranean diet enriched with olive oil reduced the incidence of type-2 diabetes by  
312 48% (Salas-Salvadó et al., 2011). When we analyzed this association among all  
313 study's participants, we also found that the Mediterranean diet had a significant  
314 protective effect against diabetes (Salas-Salvadó et al., 2014).

315 Though PREDIMED study, was not a weight loss trial, the provision of abundant  
316 fat-rich foods from natural vegetable origin (extra-virgin olive oil and nuts) did not  
317 conduct to weight gain. There is still insufficient **experimental evidence** to support the  
318 hypothesis that intentional weight loss via a healthy diet and favorable lifestyle changes  
319 reduces mortality or the incidence of CVD in the long term. Specifically, the impact of  
320 weight loss on the risk of CVD within the framework of a **Mediterranean dietary**  
321 **pattern** has not yet been tested in a sufficiently large randomized clinical trial (Malik  
322 and Hu, 2007). In light of the obesity epidemic, we propose to conduct a new trial,  
323 **PREDIMED-PLUS**, which will go beyond the achievements of the **PREDIMED** trial in  
324 order to tackle more specifically the problems of overweight and obesity. Our proposed  
325 strategy has positive effects for weight loss (based on the loss of fat mass) and long-  
326 term weight-loss maintenance (Shai et al., 2008; Beunza et al., 2010; Romaguera et  
327 al., 2010). Even more interestingly, this research may demonstrate that a **multifaceted**  
328 **lifestyle intervention** program (dietary pattern + weight loss + physical activity +  
329 behavioral support) can be an even more effective means of reducing the

330 cardiovascular risk associated with overweight and obesity than a non-energy-  
331 restricted traditional Mediterranean diet. We expect our contribution via the  
332 **PREDIMED-PLUS** trial to reveal synergies between the effects of an intensive weight-  
333 loss intervention program (with **energy restriction**, physical activity and behavioral  
334 support) and the beneficial effects of greater adherence to a high-quality diet (the  
335 **Mediterranean diet**) on the incidence of CVD.

336 Blood and urine samples will be collected and stored at the beginning and  
337 throughout the trial. Later analyses of molecular/biochemical biomarkers within the  
338 framework of genetic, epigenetic, transcriptomic, metabolomic and proteomic studies  
339 might help to determine the benefits of the intervention and the underlying  
340 mechanisms.

341

342

#### 343 **HYPOTHESIS**

344 An **intensive lifestyle intervention program** based on an energy-restricted  
345 **traditional Mediterranean diet**, increased physical activity and behavioral support is a  
346 **sustainable** approach that leads to long-term weight loss in overweight and obese  
347 adults with metabolic syndrome in such a way that the changes in lifestyle achieved will  
348 have long-term benefits on the incidence of CVD.

349 In comparison with a control intervention that provides advice on the  
350 Mediterranean diet but does not restrict calorie intake and does not promote physical  
351 activity, an intensive lifestyle intervention based on an energy-restricted **traditional**  
352 **Mediterranean diet**, promotion of physical activity, and behavioral support  
353 (Intervention group) in overweight or obese individuals with metabolic syndrome will:

- 354 1. Reduce the risk of cardiovascular events;
- 355 2. Achieve a greater reduction in body weight and lead to better long-term weight-  
356 loss maintenance;

357

#### 358 **OBJECTIVES**

359 Our long-term objective is to provide effective treatment for reducing excessive  
360 **cardiovascular morbidity and mortality** in overweight or **obese** adults, irrespective  
361 of whether the participants are diabetic at the beginning of the study. To achieve this,  
362 we will compare the effects on rates of cardiovascular disease of an **intensive** lifestyle  
363 and weight loss intervention program based on the **traditional Mediterranean diet** and  
364 including increased physical activity, energy restriction and behavioral support

365 (intervention group) with that of a non-intensive intervention program that provides both  
366 education on **the Mediterranean diet for the prevention of CVD in accordance with**  
367 **the principles outlined in the PREDIMED trial and usual care** by primary healthcare  
368 professionals (control group). The importance of attending visits to healthcare  
369 professionals will be stressed and general recommendations on management of the  
370 metabolic syndrome will be provided.

371

#### 372 **Main specific objectives**

373 To evaluate the effect of an **intensive** weight-loss-oriented lifestyle intervention  
374 program based on a **traditional Mediterranean diet** with **energy restriction,**  
375 **increased physical activity and behavioral** therapy on:

376 1. The incidence of CVD (non-fatal myocardial infarction, non-fatal stroke and  
377 cardiovascular death);

378 2. **Weight loss and long-term weight-loss maintenance;**

379

#### 380 **Secondary specific objectives**

381 This intensive intervention program is likely to result in reduction of waist  
382 circumference and acute coronary syndromes, coronary revascularization, total  
383 mortality, heart failure, peripheral artery disease, venous atrial fibrillation, type-2  
384 diabetes and its complications, total cancer, cancer in main cancer sites (breast,  
385 prostate, colorectal, lung and stomach), gallstone diseases, symptomatic gout,  
386 neurodegenerative disorders (dementia and Parkinson's disease), unipolar depression,  
387 osteoporotic fractures, and eating behavior disorders.

388 We will also address the effect of the intervention on the following intermediate  
389 outcomes: nutrient intake and overall dietary pattern, systolic and diastolic blood  
390 pressure, serum lipid concentrations, fasting glucose, glycated hemoglobin and uric  
391 acid, kidney function, liver function, C-reactive protein, anti-hypertensive, anti-diabetic  
392 and lipid-lowering medication needs, ECG traits, cognitive function, quality of life, and  
393 psychopathological scales.

394 We will also store plasma, serum, peripheral cells and urine samples to evaluate  
395 other hypotheses in the future, depending on availability of additional funding.

396

397

398

399

## 400 **METHODOLOGY**

### 401 **1. Summary**

402 We are conducting a parallel-group, multicenter, randomized, primary prevention  
403 trial in adult **men aged 55–75** and adult **women aged 60–75** with a **BMI  $\geq 27$  and  $< 40$**   
404 **kg/m<sup>2</sup>** who meet at least **three criteria for the metabolic syndrome**. In the Caucasian  
405 population, cardiovascular risk is considered to be increased if waist circumference is  $\geq$   
406 80 cm in women and  $\geq$  94 cm in men. In the South American population, the value is  
407 the same for women but for men risk is considered to be increased if waist  
408 circumference is  $\geq$  90 cm (Alberti et al., 2009). Diabetic participants will comprise no  
409 more than 25% of the final sample. This latter component and the use of the  
410 **traditional Mediterranean diet** will substantially distinguish the PREDIMED-PLUS trial  
411 from the Look AHEAD trial conducted in the United States (Ryan et al., 2003; Gregg et  
412 al., 2012; Look AHEAD Research Group, 2013), which was recently discontinued due  
413 to lack of efficiency. Participants will be divided proportionally at random into two  
414 groups: a control group and an intensive lifestyle intervention group. Intervention will be  
415 maintained for **6 years** and average follow-up time **for clinical events will be 8 years**.

416 The control group receives usual healthcare from primary care medical  
417 professionals, all the written material, instructions on following the **Mediterranean**  
418 **diet**—which was used in the PREDIMED study and has been shown to have benefits  
419 for the prevention of cardiovascular morbidity and mortality—and general lifestyle  
420 recommendations for managing the metabolic syndrome. Every six months, the control  
421 group participants are also invited to participate in group sessions led by the team of  
422 PREDIMED-PLUS dietitians, wherein they receive a free supply of virgin olive oil (6  
423 liters every 6 months) and nuts (3 kg every 6 months) in order to promote the  
424 Mediterranean diet and encourage compliance with the trial.

425 Participants in the **intensive lifestyle intervention** group are prescribed a  
426 **traditional Mediterranean diet** but in this case it is **energy-restricted**. Dietary  
427 intervention is associated with increased physical activity and behavioral therapy  
428 programs. It has specific weight-loss objectives and includes self-monitoring and  
429 frequent follow-up throughout the study. Participants in this group take part in individual  
430 interview sessions and motivational group sessions three times per month during the  
431 first year of the intervention and twice per month thereafter. They are provided free  
432 extra-virgin olive oil (one liter per month) and nuts (500 g per month)\*. The participants'

---

\*The decision to administer 500 g of mixed nuts per month was based on the results of epidemiological and clinical studies. For example, the SUN (Seguimiento Universidad de Navarra) study found that individuals who consumed nuts two or three times per week (400 g/month) had a significantly lower risk

433 degree of compliance with the intervention is monitored periodically so that the  
 434 intervention can be adjusted if necessary.

435 For the intensive intervention group, the specific weight-loss objectives are to  
 436 achieve **an average reduction in baseline body weight of over 8%** and an average  
 437 **reduction in waist circumference of over 5%** in the first six months and to maintain  
 438 these figures over an additional period of seven and a half years. The final objective is  
 439 to obtain a between-group average absolute difference in weight loss and waist  
 440 circumference reduction of over 5%.

441 Primary final outcomes include: a) non-fatal myocardial infarction, b) non-fatal  
 442 stroke, and c) cardiovascular death. Other primary objective will be weight loss (and  
 443 weight-loss maintenance). The trial protocol will be registered at ClinicalTrials.gov  
 444 (National Institutes of Health) and comply with the CONSORT guidelines for the  
 445 dissemination of results (Moher et al., 2001).

446

## 447 **2. Research team**

448 The trial will comprise 6,000 participants, one-half of whom will be assigned to the  
 449 intensive intervention group and one-half to the control group. Recruitment of  
 450 participants began in 2013 and will end in 2017. The 2 vanguard centers were Navarra-  
 451 Epidemiology (starting the recruitment in September 2013 and the randomization in  
 452 October 2013) and Reus (starting the recruitment in November 2013, and the  
 453 randomization in January 2014). Training of dietitians for the other recruiting centers  
 454 took place in December 2013. We assume that we will reach our recruitment objectives  
 455 with 20 centers each recruiting an average of 300 participants.

456 To launch the trial, we have set up a team of leading researchers with experience  
 457 in diet and lifestyle interventions and productive and well-documented collaborative  
 458 research careers in nutrition, evaluation of physical activity, internal medicine,  
 459 cardiology, endocrinology, primary health care, epidemiology, and basic sciences.

460 The prior experience gained by the 11 PREDIMED recruiting centers is one of our  
 461 most valuable assets for the PREDIMED-PLUS trial. Also, by incorporating other  
 462 centers of scientific excellence with proven experience in nutritional intervention clinical  
 463 trials (some of which also belong to the background research network of the

---

*of weight gain and metabolic syndrome than those who rarely ate them or never did (Fernández-Montero et al., 2012; Bes-Rastrollo et al., 2007). A Mediterranean-type diet with moderate fat intake containing 25 g per day (750 g/month) of peanuts or other types of nuts was found to be associated with better adherence to intervention and greater weight loss than a low-fat diet (McManus et al., 2001). The decision was also based on associations observed between baseline nut consumption and mortality in the PREDIMED trial (Guasch-Ferre et al., 2013) and in American cohorts of nurses and healthcare professionals (Bao et al., 2013).*

464 PREDIMED trial, CIBEROBN), the correct development of the PREDIMED-PLUS trial  
465 will be guaranteed and feasibility will be improved.

466 At the same time, subprojects will be devised so that all participating groups can  
467 develop their own specific nutritional research activities. This will also serve to further  
468 interest in the project and enhance scientific output.

469

### 470 **3. Preliminary studies: the PREDIMED trial**

471 In this section we present a summary of the methodology and key findings of the  
472 **PREDIMED** trial (Estruch et al., 2006; Zazpe et al., 2008; Martínez-González et al.,  
473 2012; Estruch et al., 2013), which was conducted in the context of CIBEROBN and the  
474 PREDIMED network (RD06/0045). PREDIMED was a multicenter, parallel group, trial  
475 with three intervention groups (see [www.predimed.es](http://www.predimed.es)). In 2006, the results of a pilot  
476 study were published that evaluated the effects at three months of the three  
477 interventions on classical and emergent cardiovascular risk factors in the first 772  
478 participants (Estruch et al., 2006). The design and methods of the PREDIMED trial  
479 have been described elsewhere (Martínez-González et al., 2012). Participants in the  
480 study were men aged 55-80 and women aged 60-80 without CVD at the beginning of  
481 the study but with a high risk of CVD due to the presentation of type 2 diabetes or at  
482 least three of the following six cardiovascular risk factors: smoking, high blood  
483 pressure, high LDL cholesterol level, low HDL cholesterol level, overweight or obesity,  
484 and family history of early coronary heart disease.

485 Candidates for the trial were recruited at primary care health centers. Eighty-nine  
486 per cent of those invited to participate agreed to do so and signed the corresponding  
487 informed consent form. The final sample size for the trial was 7,447 participants. The  
488 protocol was approved by the ethics research committees of all study centers and  
489 registered at the Clinical Trials Register in London (ISRCTN35739639).

490 The participants were randomly assigned in a 1:1:1 ratio to one of the following  
491 three dietary intervention groups: 1) an energy-unrestricted **Mediterranean diet**  
492 supplemented with **extra-virgin olive oil**; 2) an energy-unrestricted **Mediterranean**  
493 **diet** supplemented with **nuts**; or 3) an energy-unrestricted **control** diet with advice on  
494 how to follow a low-fat diet.

495 At the beginning of the study and quarterly thereafter, dietitians conducted  
496 individual and group dietary-training sessions (separately for each group) with a  
497 maximum of 20 participants per group (Zazpe et al., 2008). At each session of the  
498 Mediterranean diet groups, a 14-item questionnaire (Martínez-González et al., 2004;  
499 Schroeder et al., 2011) was used to assess participants' adherence to the



500 Mediterranean diet. At each session of the control group, a 9-item questionnaire was  
501 used to assess participants' adherence to the control diet. In this way the diets could be  
502 personalized and appropriate dietary changes could be negotiated individually.

503 Participants in the two **Mediterranean-diet** groups received either **extra-virgin**  
504 **olive oil** (1 liter per week for the participant and his or her family) or 30 g of **mixed**  
505 **nuts** per day (15 g of walnuts, 7.5 g of hazelnuts, and 7.5 g of almonds) at no cost and  
506 in accordance with their randomly chosen group, while those in the control group  
507 received small non-food gifts throughout the trial. At no point during the intervention  
508 was calorie restriction advised or increased physical activity encouraged.

509 Information on the primary end points (cardiovascular death, non-fatal stroke, or  
510 acute non-fatal myocardial infarction) was obtained through continuous contact with the  
511 participants, contact with primary healthcare physicians, *ad hoc* annual reviews of  
512 medical records conducted by a medical team at each center, and annual consultation  
513 of the National Death Index. The data were analyzed on an intention-to-treat basis.  
514 Participants were followed for a median of 4.8 years.

515 Participants in the two Mediterranean diet groups increased their adherence to the  
516 diet, as reflected in an average increase of 2 points on the 14-point dietary-screening  
517 questionnaire throughout the duration of the study. These participants also had higher  
518 average scores than those in the control group on all items except red and processed  
519 meats and sugary soda drinks, which were discouraged for all three intervention  
520 groups.

521 After a median follow-up of 4.8 years, 288 participants suffered a major  
522 cardiovascular event. In comparison with the control group, the multivariable-adjusted  
523 hazard ratios were 0.70 (95% confidence interval [CI], 0.54 to 0.92) for the group  
524 assigned to the Mediterranean diet with extra-virgin olive oil and 0.72 (95% CI, 0.54 to  
525 0.96) for the group assigned to the Mediterranean diet with nuts.

526  
527 **FIGURE 1. Cumulative incidence of major cardiovascular events (cardiovascular**  
528 **death, non-fatal myocardial infarction, and non-fatal stroke) by randomly**  
529 **assigned group (n=7,447).**

530

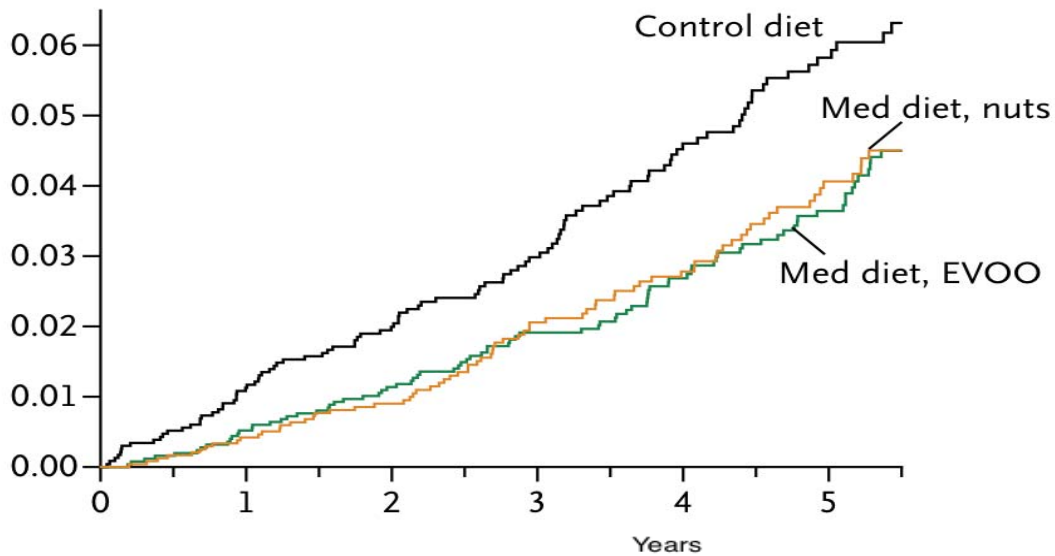

531

| Number at risk |      |      |      |      |      |      |
|----------------|------|------|------|------|------|------|
| Control group  | 2450 | 2268 | 2020 | 1583 | 1268 | 946  |
| MeDiet+EVOO    | 2543 | 2486 | 2320 | 1987 | 1687 | 1310 |
| MeDiet+Nuts    | 2454 | 2343 | 2093 | 1657 | 1389 | 1031 |

532

533

534

535 **4. Proposed trial (PREDIMED-PLUS) and eligibility criteria**

536 Candidates for the PREDIMED-PLUS trial are adults aged 55-75 for men and 60-  
 537 75 for women with a body mass index  $\geq 27$  and  $< 40 \text{ kg/m}^2$  who meet at least three  
 538 criteria for the metabolic syndrome (Alberti et al., 2009). These criteria must be taken  
 539 into consideration in view of recent evidence of the beneficial role of the Mediterranean  
 540 diet on the metabolic syndrome (Kastorini et al., 2011; Salas-Salvadó et al., 2008),  
 541 insulin resistance and diabetes (Salas-Salvadó, 2014), especially when accompanied  
 542 by a program of physical activity for endurance (Fernández et al., 2012). We will try to  
 543 ensure that 50% of the study population is made of women and that diabetic  
 544 participants do not exceed 25% of the total cohort. Individuals who participated in the  
 545 PREDIMED trial will not be eligible to participate in PREDIMED-PLUS.

546

547 4.1. Exclusion criteria:

- 548 • Illiteracy or inability/unwillingness to give written informed consent or communicate  
 549 with study staff.
- 550 • Institutionalization (the participant is a permanent or long-stay resident in a care  
 551 home).
- 552 • Documented history of previous CVD, including: angina; myocardial infarction;  
 553 coronary revascularization procedures; stroke (ischemic or hemorrhagic, including  
 554 transient ischemic attacks); symptomatic peripheral artery disease that required

- 555 surgery or was diagnosed with vascular imaging techniques; ventricular arrhythmia;  
556 uncontrolled atrial fibrillation; congestive heart failure (New York Heart Association  
557 Class III or IV); hypertrophic cardiomyopathy; and history of aortic aneurism  $\geq 5.5$   
558 cm in diameter or aortic aneurism surgery.
- 559 • Active malignant cancer or history of malignancy within the last 5 years (except non-  
560 melanoma skin cancer).
  - 561 • Inability to follow the recommended diet (for religious reasons, swallowing disorders,  
562 etc.) or to carry out physical activity.
  - 563 • A low predicted likelihood to change dietary habits according to the Prochaska and  
564 DiClemente Stages of Change Model (Nigg et al., 1999).
  - 565 • Inability to follow the scheduled intervention visits (institutionalization, lack of  
566 autonomy, inability to walk, lack of stable address, travel plans, etc.).
  - 567 • Inclusion in another program that provides advice on weight loss ( $> 5$  kg) in the six  
568 months before the selection visit.
  - 569 • History of surgical procedures for weight loss or intention to undergo bariatric surgery  
570 in the next 12 months.
  - 571 • History of small or large bowel resection.
  - 572 • History of inflammatory bowel disease.
  - 573 • Obesity of known endocrine origin (except for treated hypothyroidism).
  - 574 • Food allergy to any component of the Mediterranean diet.
  - 575 • Immunodeficiency or HIV-positive status.
  - 576 • Cirrhosis or liver failure.
  - 577 • Serious psychiatric disorders: schizophrenia, bipolar disorder, eating disorders, or  
578 depression with hospitalization within the last 6 months.
  - 579 • Any severe co-morbidity condition with less than 24 months' life expectancy.
  - 580 • Alcohol abuse or addiction (or total daily alcohol intake  $>50$  g) or drug abuse within  
581 the past 6 months.
  - 582 • History of major organ transplantation.
  - 583 • Concurrent therapy with immunosuppressive drugs or cytotoxic agents.
  - 584 • Current treatment with systemic corticosteroids.
  - 585 • Current use of weight loss medication.
  - 586 • Concurrent participation in another randomized clinical trial.
  - 587 • Patients with an acute infection or inflammation (e.g. pneumonia) will be allowed to  
588 participate in the study 3 months after resolution of their condition.
  - 589 • Any other condition that may interfere with adherence to the study protocol.
  - 590

591 **5. Recruitment and retention strategies**

592 Medical doctors from primary care centers associated with the recruiting centers  
593 recruit the participants. The mission of the primary care physicians is to ensure a high  
594 recruitment rate and an almost 100% diligence in the revision of medical records and  
595 collection of clinical information on events during follow-up. As the physicians involved  
596 in the recruitment process will also be responsible for the participants' medical care, no  
597 potential ethical conflict regarding confidentiality exists when identifying suitable  
598 candidates or reviewing medical records. Participants' eligibility criteria and  
599 demographic data are collected from the medical records at the primary care centers,  
600 which are entirely computer-based. This is done at a pre-screening evaluation stage  
601 before the potential participant is contacted. Candidates are interviewed briefly by  
602 telephone, informed about the study, and invited to attend a screening visit at the  
603 recruiting center.

604  
605 In this first formal visit (first screening visit), the candidates are explained the  
606 purpose and characteristics of the study and, if they agree to take part, they are asked  
607 to sign a written informed consent. Our experience with the PREDIMED trial showed  
608 that over 95% of eligible candidates approached in this way agreed to participate  
609 (Martínez-González et al., 2012; Estruch et al., 2013). Also, in the PREDIMED trial,  
610 which also included a long-term lifestyle intervention program (median follow-up time of  
611 4.8 years), overall retention rate was above 90% (Estruch et al., 2013).

612  
613 **6. Informed consent/Ethics Committee**

614 The institutional review boards of all the recruiting centers approved the study  
615 protocol. As described and detailed below, all participants sign informed written  
616 consent forms.

617  
618 **7. Launch of the trial**

619 The proposed calendar is as follows:

- 620 • In January 2014 the dietitians and nursing staff were hired and trained to deliver the  
621 trial's protocol.
- 622 • In February-May 2014 eligible candidates began to be called, interviewed and  
623 invited to participate in the trial.
- 624 • In June-July 2014 the first evaluation and intervention visits took place with randomly  
625 distributed selected participants.
- 626 • The recruitment period will end on December 2016.

627

628 **7.1.** The aim of the initial stage of the trial (telephone calls and interviews) is to  
629 evaluate the willingness of each candidate to participate in the study, comply with the  
630 proposed intervention, and lose weight. In addition, they are thoroughly screened in  
631 order to ensure that the eligibility criteria are met and evaluate the probability that they  
632 will:

- 633 a) attend the scheduled sessions,
- 634 b) complete the protocol's assessment tools, i.e., the self-monitoring and recording  
635 of lifestyle and food habits and, most importantly,
- 636 c) change their dietary habits in accordance with the Stages-of-Change model (Nigg  
637 et al., 1999), as occurred in the PREDIMED trial.

638

639 **7.2.** The run-in period (for evaluation prior to randomization) lasts four weeks. It  
640 comprises an initial screening visit, a phone call at 2 weeks, and a final evaluation visit.

641 **7.2.1.** The first screening visit (45-60 min) comprises:

- 642 a) administration of a questionnaire on inclusion and exclusion criteria. Candidates  
643 who are deemed eligible to participate in the trial continue to the next stage.
- 644 b) explanation of the study, distribution of the **study information sheet**, and  
645 completion of the **informed consent forms** (these are essential for inclusion in the  
646 trial). Eligible candidates are asked to sign two informed consent forms: one for  
647 participation and analysis of general variables and one for the collection of DNA for  
648 genetic analyses. All procedures and anticipated time commitment are explained in  
649 detail. Candidates are also told that, if they do not satisfy the eligibility criteria, they  
650 will be excluded from the study. The informed consent form includes a statement  
651 allowing researchers to review the participants' medical records throughout the trial  
652 at both the primary care centers and reference hospitals in order to ascertain the  
653 occurrence of any events.
- 654 c) performance of ECG and recording of height, weight, waist circumference and  
655 blood pressure.
- 656 d) distribution of a leaflet containing general recommendations on managing the  
657 metabolic syndrome.
- 658 e) Distribution of a 3-day food record questionnaire (2 working days and 1 weekend  
659 day), a leisure-time physical activity questionnaire, and a self-measurement chart in  
660 which participants self-record their weight, waist circumference and hip  
661 circumference (participants are given a tape measure). Dietitians give instructions  
662 on how and when to complete the food record and physical activity questionnaires

663 and how to record their weight, waist and hip measurements (once a week during  
664 the trial).

665 f) Distribution of the clinical psychopathological questionnaires (Beck Depression  
666 Inventory (BDI-II), multidimensional scale of weight locus of control, eating disorders  
667 diagnostic criteria, and quality of life scale (SF-36)) to be completed at home (see  
668 below).

669 Participants are asked to return their completed questionnaires at the third  
670 screening visit (see below).

671 **7.2.2. Second screening visit.** After 2 weeks, participants receive a telephone call to  
672 assess their change in weight and remind them to bring to the next screening visit  
673 their completed food record, and physical activity questionnaires, self-measurement  
674 chart, psychopathological questionnaires, and quality of life scale.

675 **7.2.3. Third screening visit.** This evaluation visit on completion of the four-week run-in  
676 period (30 min) includes:

677 a) Collection by the dietitian of the participants' food record and physical activity  
678 questionnaires, self-measurement charts, psychopathological questionnaires, and  
679 quality of life scales.

680 b) Measurement by the dietitian of the participants' weight and hip circumferences.

681 c) Administration and completion of a 143-item food-frequency questionnaire and 5  
682 cognitive-neuropsychological tests, which, unlike the clinical psychopathological  
683 questionnaires, must be completed in the presence of PREDIMED-PLUS personnel.  
684 These 5 tests are: the Mini-Mental State examination, the phonological verbal  
685 fluency test, the reverse digits test, the trail making test, and the clock test (see  
686 below).

687 d) Explanation to participants that they will be informed by telephone if they have  
688 been selected to participate in the trial.

689 e) Explanation of night-time fasting for *in situ* extraction of blood sample and first  
690 morning urine sample, and of basal evaluation immediately after randomization for  
691 candidates who are chosen to participate in the trial.

692

693 Only candidates who satisfy the following four criteria are selected and randomly  
694 assigned to one of the two intervention groups:

695 1) Full attendance at the two previous sessions, at the scheduled times and having  
696 answered the telephone call;

697 2) Correct completion of the clinical psychopathological questionnaires (Beck  
698 Depression Inventory (BDI-II), multidimensional scale of weight locus of control, eating  
699 disorders diagnostic criteria, and quality of life scale (SF-36);

700 3) Correct completion of the food record and physical activity questionnaires;

701 4) Correct self-recording of at least three weight measurements and three waist-  
702 circumference measurements.

703 5) Loss of >1.5 kg during the run-in period.

704

705 The lag time between completion of the run-in phase and the beginning of the  
706 intervention ranges from one week to one month.

707

708 **8. Initial screening, follow-up visits, and evaluations**

709 Table 1 shows the main data collection measurements and activities by visit.

710 **TABLE 1. The following data are collected per visit in the PREDIMED-PLUS trial.**

|                                                     | RUN-IN PERIOD |    |    |          |     |     |     |     |     |     |     |     |     |
|-----------------------------------------------------|---------------|----|----|----------|-----|-----|-----|-----|-----|-----|-----|-----|-----|
|                                                     | S1            | S2 | S3 | Baseline | M-6 | Y-1 | Y-2 | Y-3 | Y-4 | Y-5 | Y-6 | Y-7 | Y-8 |
| 1. ELIGIBILITY QUESTIONNAIRE                        | X             |    |    |          |     |     |     |     |     |     |     |     |     |
| 2. 3-DAY FOOD REGISTER                              | e             |    | X  |          |     |     |     |     |     |     |     |     |     |
| 3. ANTHROPOMETRIC MEASUREMENTS*                     | X             |    | X  | X        | X   | X   | X   | X   | X   | X   | X   | X   | X   |
| 4. GENERAL QUESTIONNAIRE                            |               |    |    | X        |     |     |     |     |     |     |     |     |     |
| 5. 143-ITEM FFQ                                     |               |    | X  |          | X   | X   | X   | X   | X   | X   | X   | X   | X   |
| 6. MEDITERRANEAN DIET QUESTIONNAIRE (17/14-Items)** |               |    |    | X        | X   | X   | X   | X   | X   | X   | X   | X   | X   |
| 7. PHYSICAL ACTIVITY QUESTIONNAIRE†                 | e†            |    | X† | X        | X   | X   | X   | X   | X   | X   | X   | X   | X   |
| 8. CHAIR TEST (Physical activity evaluation)        |               |    |    | X        | X   | X   | X   | X   | X   | X   | X   | X   | X   |
| 9. ACCELEROMETERS                                   |               |    | e  | X        | X   | X   | X   | X   | X   | X   | X   | X   | X   |
| 10. FOLLOW-UP QUESTIONNAIRE                         |               |    |    |          | X   | X   | X   | X   | X   | X   | X   | X   | X   |
| 11. ELECTROCARDIOGRAM                               | X             |    |    |          | X   | X   | X   | X   | X   | X   | X   | X   | X   |
| 12. BLOOD PRESSURE MEASUREMENT                      | X             |    | X  | X        | X   | X   | X   | X   | X   | X   | X   | X   | X   |
| 13. BLOOD SAMPLE COLLECTION                         |               |    |    | X        | X   | X   |     | X   |     | X   |     | X   | X   |
| 14. MORNING SPOT URINE COLLECTION                   |               |    |    | X        | X   | X   |     | X   |     | X   |     | X   | X   |
| 15. NAIL COLLECTION                                 |               |    |    | X        |     | X   |     | X   |     | X   |     | X   | X   |
| 16. COGNITIVE-NEUROPSYCHOLOGICAL TESTS‡             |               |    | X  |          |     |     | X   |     | X   |     | X   |     | X   |
| 17. PSYCHOPATHOLOGICAL QUESTIONNAIRES‡              | e             |    | X  |          |     | X   | X   | X   | X   | X   | X   | X   | X   |
| 18. QUALITY OF LIFE QUESTIONNAIRES‡                 | e             |    | X  |          |     | X   |     | X   |     | X   |     | X   |     |

711 S: Screening visit; FFQ: Food-frequency questionnaire; M: Month; d: Delivery.  
 712 \* Anthropometric measurements include: weight, height, waist circumference and hip circumference.  
 713 ‡ Short version of the Minnesota leisure time physical activity questionnaire; PAR-Q, RAPA (RAPA1 and RAPA2) questionnaires; and the NHS sedentary lifestyle questionnaire  
 714 † Long version of the Minnesota leisure time physical activity questionnaire.  
 715 \*\*Short questionnaires on adherence to the Mediterranean Diet. The control group uses the same 14-item questionnaire that was used in the PREDIMED trial (Schroeder et al.,  
 716 2011). The intervention group uses the 17-item energy-restricted Mediterranean diet questionnaire (see below).  
 717 ‡Mini-Mental Status Examination, clock test, phonological verbal fluency test (animals + P), the reverse series of digits test (WAIS-III), and the trail making test.  
 718 ‡Beck Depression Inventory (BDI-II), multidimensional scale of weight locus of control, eating disorders diagnostic criteria, and SF-36 quality of life scale.



719 Eligibility: Eligibility for inclusion in the trial is assessed at the beginning of the study.  
720 Selected participants must satisfy all the eligibility criteria. Exclusion criteria are also  
721 verified.

722 Anthropometric measurements: Weight will be recorded every three months (in all  
723 participants) throughout the duration of the trial and waist circumference will be  
724 recorded at each visit, with participants in light clothing and without shoes or  
725 accessories, using a high-quality electronic scale that will be calibrated every 3 months  
726 with a unit of known mass. Height is measured at study entrance with a stadiometer.  
727 Waist circumference is measured midway between the lowest rib and the iliac crest.  
728 Hip circumference is measured at the widest part at the baseline visit and on a yearly  
729 basis.

730 General information: Information on medical history, family history and use of  
731 medication is collected at the baseline visit by means of the general questionnaire,  
732 using the same protocol as in the PREDIMED trial (See supplementary file in Estruch R  
733 et al., New Engl J Med 2013).

734 Evaluation of food habits and dietary intake: The previously validated 143-item food-  
735 frequency questionnaire is administered at the third screening visit and at each annual  
736 follow-up visit to evaluate the diet of each participant (Fernández-Ballart et al., 2010).  
737 In addition, the 17-item energy-restricted Mediterranean diet questionnaire (see below)  
738 is completed at each visit. This questionnaire, which includes several changes with  
739 respect to a previously validated tool (Schroder et al., 2011), is used both to assess  
740 participants' compliance with the intervention and to guide the individual motivational  
741 interviews during follow-up. The control group, on the other hand, is administered the  
742 same 14-item questionnaire that was used for the PREDIMED trial (Schröder et al.,  
743 2011).

744 Physical activity: Except for the first screening visit (when participants complete the  
745 Minnesota leisure time physical activity questionnaire), at the beginning of the study,  
746 after 6 months, and during the follow-up visits, participants will complete a short version  
747 of a previously validated physical activity questionnaire (Elosua et al., 1994; Elosua et  
748 al., 2000). Also at these latter visits, participants will perform the chair test (1 minute) in  
749 order to evaluate their physical fitness and complete the following questionnaires: the  
750 PAR-Q (Physical Activity Readiness Questionnaire), the RAPA (RAPA1 and RAPA2)  
751 (Rapid Assessment of Physical Activity), and the NHS (Nurses' Health Study)  
752 sedentary lifestyle questionnaire. All these questionnaires are described in the  
753 PREDIMED-PLUS website: <http://www.PREDIMEDPLUS.COM>. Each participant  
754 randomly assigned to the intervention group is also provided with a pedometer (Yamax

755 SW200 Digi-Walker) to self-monitor the number of steps walked per day. GENEActiv  
756 accelerometers are provided as well to a subset of participants (50% of participants in  
757 the intensive intervention group and 20% of those in the control group) in order to  
758 quantify physical activity at baseline, 6 months, 1 year, and each year thereafter. In  
759 accordance with an evaluation based on physical status, recommendations on aerobic  
760 physical activities and strength training are progressively made and activities to  
761 improve balance and flexibility encouraged on completion of physical activity.

762 Self-reported information during follow-up. At the follow-up visits, participants are asked  
763 about clinical events that may have occurred between visits and information about  
764 medication prescribed is updated.

765 Evaluation of adverse effects: At 6 months and yearly thereafter, participants complete  
766 a specific questionnaire to report any adverse effects felt to be derived from the  
767 intervention or weight loss.

768 Electrocardiogram: ECGs are performed at the primary care centers at the first  
769 screening visit, 6 months, and at annual follow-up visits thereafter. The ECGs will be  
770 scanned, stored and registered in the specific database designed for that purpose. The  
771 nursing staff at each recruiting center will be responsible for receiving and scanning the  
772 ECGs, digitizing their contents, and maintaining the registry and database.

773 Fasting blood collection: Fasting blood samples are collected at the baseline visits, 6  
774 months, 12 months, 3 years, 5 years, 7 years, and at the final follow-up visit.  
775 Conventional analyses [lipid profile (total cholesterol, HDL-cholesterol, LDL-cholesterol,  
776 and triglycerides), fasting plasma glucose, blood cell count, serum sodium, potassium,  
777 calcium, uric acid, urea, creatinine, albumin, C-reactive protein, erythrocyte  
778 sedimentation rate, hemoglobin A1C, liver function tests (serum bilirubin, alkaline  
779 phosphatase, alanine transaminase, aspartate aminotransferase and gamma-  
780 glutamyltranspeptidase) and optional coagulation tests (prothrombin time, activated  
781 partial thromboplastin time and fibrinogen)] are performed at the baseline and follow-up  
782 visits according to the trial protocol. The nursing staff at the recruiting centers is  
783 responsible for collecting, processing, delivering, storing and preserving the samples,  
784 digitizing the information, and maintaining the registry and database for all samples and  
785 analyses.

786 Morning spot urine collection: A sample of morning spot urine is collected *in situ* at the  
787 baseline visit, 6 months, 12 months, 3 years, 5 years and 7 years, and at the final  
788 follow-up visit. Conventional analyses (albumin and creatinine in urine) are performed  
789 at the baseline and follow-up visits according to the trial protocol. The nursing staff is

790 responsible for collecting, processing, delivering, preserving, recording, and  
791 maintaining the samples.

792 Nail sample collection: Nail samples are collected *in situ* at the baseline visit, 12  
793 months, 3 years, 5 years and 7 years and at the final follow-up visit. Patients are asked  
794 to attend the visits without having cut their toenails. Using toenail clippers, the patients'  
795 nails will be cut and placed in labelled zip-lock bags.

796

797 Neuropsychological and Quality of Life evaluation:

798 This evaluation includes three parts:

799 A) *Cognitive Function*

800 B) *Quality of life*

801 C) *Psychopathology*

802 At baseline and every two years thereafter (2-, 4-, 6- and 8-year follow-up visits),  
803 participants complete a battery of 6 tests of *Cognitive Function* (see below, section A).  
804 The first (Mini-Mental State Examination (MMSE)) is a general screening cognitive test,  
805 while the other 5 tests explore different cognitive domains and are aimed at assessin  
806 changes in cognitive performance. The *Cognitive Function* tests will be alternated with  
807 the *Quality of life* tests (see section B), so that in even years the 6 tests of *Cognitive*  
808 *Function* will be collected and in odd years only the quality of life test will be  
809 administered (see below, section B). The 2-year lapse between sequential cognitive  
810 tests will reduce bias due to a "learning" effect.

811 The *Quality of Life* scales (Short -Form 36 or SF -36, see section B) are collected from  
812 all participants at the beginning of the study and in odd years thereafter (after 1-, 3-, 5-,  
813 and 7- year follow-up visits), while the psychopathology questionnaires (see below,  
814 section C) are collected at the beginning of the study and annually.

815

816 All instruments included in the *Cognitive* battery (A), *Quality of Life* (B), and  
817 psychopathology (C) have been standardized for the Spanish population in the age  
818 range of the study. The complete battery of cognitive, quality of life, and  
819 psychopathology examinations includes the following tests:

820

821 A) *Six cognitive neuropsychological tests (lasting 16 minutes, to be completed in face-*  
822 *to-face interviews):*

823 1) MMSE (Folstein et al, 1975);

824 2) Semantic verbal fluency test: "animals in 1 minute" (Ramier and Hécaen, 1970,  
825 1977; Benton et al.,1994);

- 826 3) Phonemic verbal fluency test: “words in 1 minute starting with the letter ‘p’ (Benton et  
 827 al.,1994);  
 828 4) Verbal and visual working memory: reverse digits test (WAIS-III), Wechsler, 1997):  
 829 5) Trail Making Test (Reitan, 1973);  
 830 6) Clock test (Clock drawing test or CDT).

831

832 Normative data for these tests in the Spanish population have been published by Peña-  
 833 Casanova et al. (2009a, 2009b). These six tests are collected in the run-in period and  
 834 each even follow-up year thereafter (years 2, 4, 6 and 8). These six tests, which take  
 835 roughly 16 minutes to complete, are administered by PREDIMED-PLUS personnel at  
 836 the third screening visit and each even follow-up year thereafter (years 2, 4, 6 and 8).

837

838 B) *One test of Quality of Life (5-10 minutes, to be completed at home):*

839 The SF-36 (36-item) quality of life questionnaire (Alonso et al., 1995, 1998; Ware and  
 840 Gandek 1998) is administered during the run-in period and every odd year of follow-up  
 841 thereafter (years 1, 3, 5 and 7). In this way, these tests will be alternated with the  
 842 neuropsychological questionnaires.

843

844 C) *Three Psychopathological questionnaires (lasting 20-25 minutes, to be completed at*  
 845 *home):*

846 1) Beck Depression Inventory (BDI-II) (Beck, Steer and Brown, 1996; Sanz, Navarro  
 847 and Vázquez, 2003);

848 2) Multidimensional scale of weight locus control (Wallston, Wallston and DeVellis,  
 849 1978);

850 3) Screening for comorbid eating disorders with diagnostic criteria (DSM-IV-TR; APA,  
 851 2000).

852 The 10 questionnaires above (sections A, B and C) are collected in all participants in  
 853 the PREDIMED-PLUS study.

854

855 The four questionnaires of sections B) and C) are delivered to the participants at the  
 856 screening visit 1 to be completed at home or at another time outside the study visit.  
 857 Participants are required to deliver filled-in questionnaires to the recruiting centers  
 858 within a 15-day period. The same procedure is repeated at follow-up visits when  
 859 required. The nursing staff at each recruiting center is responsible for collecting,  
 860 processing, sending, and keeping all the information pertaining to the cognitive tests.

861

862 To ensure that graphical data from cognitive tests (drawings of the MMSE and clock  
 863 and Trail Making tests) are saved for future monitoring, questionnaires from Group A  
 864 tests are collected in paper format designed for optical scanning that, once completed,  
 865 is mailed to the Navarra center (after saving a security photocopy in the recruiting  
 866 center) to be computerized by optical reading, a time-saving and materially mistake-  
 867 free procedure. Questionnaires from groups B and C tests, which are completed at the  
 868 participant's home, are also in paper format designed for optical scanning to be read in  
 869 the Navarra center following the same procedures.

870

871 **Outcome definition and ascertainment**

872 Clinical events will be ascertained by a Clinical Event Ascertainment Committee  
 873 led by Dr. Fernando Arós of the Vitoria group. The committee members are M.  
 874 Aldamiz, A. Alonso, J. Berjón, L. Forga, J. Gállego, M. A. García Layana, A. Larrauri, J.  
 875 Portu, J. Timiraos, and M. Serrano-Martínez. Clinical event ascertainment will be based  
 876 on information collected from the participants' medical records, which each year will be  
 877 reviewed on an *ad hoc* basis by the medical doctors participating in the PREDIMED-  
 878 PLUS trial. These doctors and the members of the Ascertainment Committee will be  
 879 blinded to the assignment of participants to the two intervention groups. The reports  
 880 sent to the Clinical Events Committee will contain no personal information about the  
 881 participants and will be identified only by a code.

882

883 9.1. Primary outcomes

884 1. Non-fatal acute coronary syndrome (acute myocardial infarction), non-fatal stroke or  
 885 cardiovascular mortality.

886 1.a. Acute myocardial infarction (MI) will be defined according to the third universal  
 887 definition of MI on behalf of the Joint ESC/ACCF/AHA/WHF Task Force (Thygesen  
 888 et al., 2012) as evidence of myocardial necrosis in a clinical setting consistent with  
 889 acute myocardial ischemia.

890

891 Any one of the following criteria meets the diagnosis for MI:

892 • Detection of a rise and/or fall of cardiac biomarker values [preferably cardiac  
 893 troponin (cTn)] with at least one value above the 99th percentile upper reference  
 894 limit (URL)

895 AND

896 • At least one of the following:

897 (i) Symptoms of ischemia.

- 898 (ii) New or presumed new significant ST-segment–T wave (ST–T)  
 899 changes or new left bundle branch block.  
 900 (iii) Development of pathological Q waves in the ECG.  
 901 (iv) Imaging evidence of new loss of viable myocardium or new  
 902 regional wall motion abnormality.  
 903 (v) Identification of an intracoronary thrombus by angiography.

904 Prior MI

905 Any one of the following criteria meets the diagnosis for prior MI:

- 906 • Pathological Q waves with or without symptoms in the absence of non-ischemic  
 907 causes.  
 908 • Imaging evidence of a region of loss of viable myocardium that is thinned and  
 909 fails to contract, in the absence of a non-ischemic cause.  
 910 • Pathological findings of a prior MI

911

912 1.b. Stroke will be defined as an acute neurological deficit lasting more than 24 hours  
 913 caused by an abrupt impairment of brain function due to blockage of blood flow in  
 914 a particular artery supplying the brain (thrombosis or arterial embolism) or a  
 915 cerebral haemorrhage.

916

917 Ischemic Stroke is defined following the updated definition of stroke for the 21<sup>st</sup>  
 918 Century: A Statement for Healthcare Professionals from the American Heart  
 919 Association/American Stroke Association (Sacco RL, et al. 2013) as an episode of  
 920 neurological dysfunction caused by focal cerebral, spinal, or retinal infarction.  
 921 Central nervous system (CNS) infarction is brain, spinal cord, or retinal cell death  
 922 attributable to ischemia, based on:

- 923 1. Pathological, imaging, or other objective evidence of cerebral, spinal cord,  
 924 or retinal focal ischemic injury in a defined vascular distribution;  
 925 2. Clinical evidence of cerebral, spinal cord, or retinal focal ischemic injury  
 926 based on symptoms persisting  $\geq 24$  hours or until death, and exclusion of  
 927 other potential causes such as hypoglycaemia or seizures.

928 Silent CNS infarction will not be considered as a primary end-point if defined as  
 929 imaging or neuropathological evidence of CNS infarction without a history of acute  
 930 neurological dysfunction attributable to the lesion.

931

932 Haemorrhagic Stroke. Stroke caused by intracerebral hemorrhage is defined as  
 933 rapidly developing clinical signs of neurological dysfunction attributable to an

934 intracerebral hemorrhage, defined as a focal collection of blood within the brain  
 935 parenchyma or ventricular system that is not caused by trauma. Stroke caused by  
 936 subarachnoid hemorrhage is defined as a rapidly developing signs of neurological  
 937 dysfunction and/or headache because of bleeding into the subarachnoid space,  
 938 which is not caused by trauma.

939 Silent cerebral hemorrhage will not be considered as primary end-point. It is  
 940 defined as a focal collection of chronic blood products within the brain  
 941 parenchyma, subarachnoid space, or ventricular system detected at neuroimaging  
 942 or neuropathological examination that is not caused by trauma and lacks\_a history  
 943 of acute neurological dysfunction attributable to the lesion.

944

945 1.c. Cardiovascular mortality: Includes sudden death and non-sudden cardiovascular  
 946 death (Buxton AE, et al. 2006).

947

948 Sudden (cardiac) death is due to cessation of cardiac activity with hemodynamic  
 949 collapse, typically due to sustained ventricular tachycardia/ventricular fibrillation. It  
 950 may be:

951 — Witnessed instantaneously in a previously stable patient. This may occur with or  
 952 without preceding signs or symptoms, or may occur immediately following sudden  
 953 dyspnea, light-headedness, or palpitations.

954 — Unwitnessed. Patient found dead who at the time of last witnessed contact was  
 955 in his/her usual state of health without medical complaints or obvious difficulty.  
 956 This applies to patients dying during sleep.

957

958 Non-sudden cardiac death: Includes deaths of patients from acute pulmonary  
 959 edema with severe, progressive heart failure, cardiogenic shock, or after a recent  
 960 cardiac surgical procedure.

961 Non-cardiac vascular death: Includes deaths due to thromboembolic events,  
 962 stroke, dissecting aneurysm and peripheral artery disease.

963

964 2. Weight change. The study nurse records weight at each follow-up visit. The  
 965 measurement are made according to the study manual of operations and with  
 966 participants dressed in light clothing and no shoes and accessories.

967

968

969

- 970 9.2. Secondary outcomes
- 971
- 972 1. Total mortality. This endpoint comprises all causes of death, including those from
- 973 CVD (see point 1c of primary end-point), as well as trauma, renal failure,
- 974 neoplasia, sepsis, suicide and death of undetermined cause. All deaths should be
- 975 confirmed by reviewing the National Death Index.
- 976
- 977 2. Changes in waist circumference. The study nurse will measure waist circumference
- 978 at each follow-up visit according to the manual of operations.
- 979
- 980 3. Non-ST-segment elevation acute coronary syndrome (unstable angina): The
- 981 diagnosis of unstable angina will be made following the definition of the ESC
- 982 Guidelines for the management of acute coronary syndromes in patients presenting
- 983 without persistent ST-segment elevation (Hamm et al, 2011); It requires the
- 984 presence of at least one of the following clinical characteristics:
- 985 a. Prolonged (>20 min) anginal pain at rest.
- 986 b. New onset (de novo) angina (Class II or III of the Classification of the
- 987 Canadian Cardiovascular Society).
- 988 c. Recent destabilization of previously stable angina with at least Canadian
- 989 Cardiovascular Society Class III angina characteristics (crescendo angina).
- 990
- 991 4. Coronary revascularization (percutaneous or surgical): The two main indications for
- 992 percutaneous or surgical revascularization are:
- 993 1) Patients with unstable angina or non-ST-segment elevation acute coronary
- 994 syndrome.
- 995 2) Patients considered likely to benefit from such surgery on the basis of the
- 996 location and severity of chest pain, the number of vessels affected, and the
- 997 presence of left ventricular dysfunction (Hamm et al, 2011).
- 998
- 999 5. Heart failure. Acute and chronic heart failure (HF) is a syndrome in which patients
- 1000 have typical symptoms and signs resulting from an abnormality of cardiac structure
- 1001 or function (McMurray JJ, et al. 2012; Yancy CW, et al. 2013). The cardinal
- 1002 manifestations of HF are dyspnea and fatigue, which may limit exercise tolerance,
- 1003 and fluid retention, which may lead to pulmonary and/or splanchnic congestion
- 1004 and/or peripheral edema.
- 1005 5.a. The diagnosis of HF with Reduced Ejection Fraction requires three conditions to



- 1006 be satisfied: 1. Symptoms typical of HF; 2. Signs typical of HF and 3. Reduced  
 1007 ejection fraction (< 40%)
- 1008 5.b. The diagnosis of HF with Preserved Ejection Fraction requires four conditions to  
 1009 be satisfied: 1. Symptoms typical of HF; 2. Signs typical of HF; 3. Normal or  
 1010 only mildly reduced left ventricular ejection fraction and non-dilated left ventricle;  
 1011 and 4. Relevant structural heart disease (left ventricular hypertrophy/left atrium  
 1012 enlargement) and/or diastolic dysfunction
- 1013 5.c. A Heart Failure event may include hospitalization or an urgent outpatient visit. In  
 1014 this setting the event needs to meet ALL of the following criteria:
- 1015 - The patient exhibits documented new or worsening symptoms of HF on  
 1016 presentation, including at least ONE of the following: Dyspnea, decreased  
 1017 exercise tolerance, fatigue or other symptoms of worsened end-organ perfusion  
 1018 or volume overload.
  - 1019 - The patient has objective evidence of new or worsening HF, consisting of at  
 1020 least TWO physical examination findings OR one physical examination finding  
 1021 and at least ONE laboratory criterion), including: Physical examination findings  
 1022 considered to be due to heart failure, including new or worsened peripheral  
 1023 edema, increasing abdominal distention or ascites (in the absence of primary  
 1024 hepatic disease), rales/crackles/crepitations at pulmonary auscultation,  
 1025 increased jugular venous pressure and/or hepatojugular reflux, S3 gallop, and  
 1026 clinically significant or rapid weight gain thought to be related to fluid retention
  - 1027 - Laboratory evidence of new or worsening HF, if obtained within 24 hours of  
 1028 presentation, including: Increased B-type natriuretic peptide (BNP)/ N-terminal  
 1029 pro-BNP (NT-proBNP) concentrations OR cardiological evidence of pulmonary  
 1030 congestion OR echocardiographic data of congestion or decreased cardiac  
 1031 output.
  - 1032 - The patient receives initiation or intensification of specific treatment for HF.
- 1033
- 1034 6. Peripheral artery disease. Ascertainment will be made according to the Inter-  
 1035 Society Consensus for the Management of Peripheral Arterial Disease (TASC II)  
 1036 (Norgren et al., 2007) and ESC Guidelines for the diagnosis of peripheral artery  
 1037 disease (Tendera M, et al., 2011). For participants with intermittent claudication,  
 1038 aged 60-69 with one cardiovascular risk factor, or aged ≥70 years, a resting ankle-  
 1039 brachial systolic pressure index ≤0.90 or an abnormal echo-Doppler examination,  
 1040 magnetic resonance imaging, or arteriography will be considered as diagnostic  
 1041 (confirmed case).

1042 7. Venous thromboembolism (VTE): all VTE need to satisfy the standard diagnosis  
 1043 criteria for venous thrombosis or (thromb-) Pulmonary Embolism (PE) in the general  
 1044 population (see below 1-3). The diagnosis should be confirmed by objective imaging  
 1045 techniques (including echography, phlebography, pulmonary computed tomography  
 1046 angiography (angioCTA), NMR, etc.) and not only be based on the clinical  
 1047 suspicion.

1048 Standard diagnosis criteria for VTE in clinical studies (Carrier M et al, 2012):

1049 1. Deep venous thrombosis, defined as the loss of venous compressibility or the  
 1050 inability of filling the deep vein intraluminal segment at the lower/upper limbs, as  
 1051 detected by echography with venous compression or phlebography, respectively.

1052 • The presence of thrombus at the distal lower limb (distal from the popliteal vein)  
 1053 qualifies for primary VTE only if it is asymptomatic.

1054 • All proximal thrombus qualify for final primary end-point if detected by imaging  
 1055 techniques (echography or radiology), regardless of whether it is or not  
 1056 asymptomatic.

1057 2. Pulmonary Embolism (PE) is defined as:

1058 Contrast pulmonary arteriography:

1059 • Defects in intraluminal filling, as contrasted with two projections.

1060 • Sudden stoppage of the contrast in one or several vessels with a diameter greater  
 1061 than 2.5 mm

1062 • Pulmonary scintigraphy based on ventilation/perfusion (V/Q):

1063 o A V/Q-pulmonary scintigraphy with high probability of PE in patients with no low  
 1064 clinical probability of PE.

1065 • Pulmonary angiography using computed tomography:

1066 o Defects in filling sub-segmental or more proximal vessels

1067 3. Fatal PE is defined as:

1068 • Death exclusively caused by PE and/or its confirmation at autopsy or using  
 1069 radiology techniques

1070 Important considerations:

1071 a) Superficial venous thrombophlebitis should not be described as VTE.

1072 b) It is highly recommended to describe VTE according to the anatomic position:

1073 • Lower limbs

1074 • Upper limbs

1075 • Pulmonary embolism

1076 • Others: vessels at the splanchnic level, cerebral veins, etc.

1077 c) The description of the VTE is highly convenient (for instance, distal to popliteal vein

- 1078 vs. proximal VTE; sub-segmental level vs. central PE)
- 1079 d) VTE associated with a central catheter (for instance, deep venous thrombosis at the
- 1080 upper limbs) should be reported separately.
- 1081 e) Incidental VTE should be differenced from any other symptomatic events.
- 1082
- 1083 8. Atrial fibrillation (AF): AF is defined following the Guidelines of the American College
- 1084 of Cardiology Foundation/American Heart Association Task Force on Practice
- 1085 Guidelines together with the European Society of Cardiology, the European Heart
- 1086 Rhythm Association, and the Heart Rhythm Society (Camm AJ, et al. 2010; Fuster
- 1087 V, et al. 2011), as a cardiac arrhythmia with the following characteristics:
- 1088 (1) The surface ECG shows 'absolutely' irregular RR intervals, i.e., RR intervals that
- 1089 do not follow a repetitive pattern.
- 1090 (2) There are no distinct P waves on the surface ECG. Some apparently regular
- 1091 atrial electrical activity may be seen in some EKG leads, most often in lead V1.
- 1092 (3) The atrial cycle length (when visible), i.e., the interval between two atrial
- 1093 activations, is usually variable and <200 ms (>300 bpm).
- 1094
- 1095 9. Type 2-diabetes. New-Onset Type 2 Diabetes cases are diagnosed following the
- 1096 recommendations of the American Diabetes Association:
- 1097 1. HbA1C  $\geq 6.5\%$ . This test should be performed in a laboratory using a method that
- 1098 is National Glycohemoglobin Standardization Program (NGSP) certified and
- 1099 standardized to the DCCT assay. OR
- 1100 2. Fasting plasma glucose (FPG)  $\geq 126$  mg/dL (7.0 mmol/L). Fasting is defined as no
- 1101 caloric intake for at least 8 hours OR
- 1102 3. Two-hour plasma glucose (PG)  $\geq 200$  mg/dL (11.1 mmol/L) during an oral glucose
- 1103 tolerance test (OGTT). This test should be performed as described by the WHO,
- 1104 using a glucose load containing the equivalent of 75 g anhydrous glucose
- 1105 dissolved in water OR
- 1106 4. In a patient with classic symptoms of hyperglycemia or hyperglycemic crisis, a
- 1107 random plasma glucose  $\geq 200$  mg/dL (11.1 mmol/L).
- 1108 In the absence of unequivocal hyperglycemia, results should be confirmed by
- 1109 repeat testing (American Diabetes Association, 2014).
- 1110
- 1111 10. Type-2 diabetes complications. Participants will be assessed yearly for
- 1112 microvascular complications of diabetes:
- 1113 1. Diabetic nephropathy: Kidney disease in diabetes is defined based on the

1114 alteration of glomerular filtration rate (GFR) and /or the presence of persistent  
 1115 albuminuria at levels of 30 mg/24 h or more (normal albumin excretion is  
 1116 currently defined as < 30 mg/24 h). GFR is estimated through a quantitative  
 1117 formula, the Modification of Diet in Renal Disease (MDRD) equation, that  
 1118 measures the progression of kidney involvement. Persistent albuminuria is  
 1119 determined by the urine albumin to creatinine ratio (normal <30 mcg albumin/mg  
 1120 creatinine) in a routine morning urine sample. Because of variability in urinary  
 1121 albumin excretion, two of three morning specimens collected within a 3- to 6-  
 1122 month period should be abnormal before considering a patient to have  
 1123 developed increased urinary albumin excretion or a progression of albuminuria.  
 1124 The presence of one or two of the above criteria indicates renal disease in these  
 1125 patients and the requirement for appropriate follow-up for progression of renal  
 1126 disease (American Diabetes Association, 2014).

1127 The stages of chronic kidney disease by GFR will be reported as follows:

- 1128 1. Kidney damage with normal or increased GFR  $\geq 90$  mL/min/1.73 m<sup>2</sup> body  
 1129 surface area
- 1130 2. Kidney damage\* with mildly decreased GFR 60–89 mL/min/1.73 m<sup>2</sup> body  
 1131 surface area
- 1132 3. Moderately decreased GFR 30–59 mL/min/1.73 m<sup>2</sup> body surface area
- 1133 4 Severely decreased GFR 15–29 mL/min/1.73 m<sup>2</sup> body surface area
- 1134 5. Kidney failure <15 mL/min/1.73 m<sup>2</sup> body surface area or dialysis
- 1135 2. Diabetic retinopathy: Diagnosed by ophthalmologic examination and/or treatment  
 1136 with laser photocoagulation (American Diabetes Association, 2014).
- 1137 3. Diabetic polyneuropathy: Diagnosed by clinical symptoms, neurological  
 1138 examination and results of electrophysiological studies of peripheral nerves  
 1139 (American Diabetes Association, 2014).

1140 \*Kidney damage defined as abnormalities in urine, blood, or imaging tests.

1141

1142 11. Cancer. All cancers except non-melanoma skin cancer will be considered. Cancer  
 1143 cases will be coded according to the International Classification of the World Health  
 1144 Organization (International Agency for Research in Cancer, WHO, 2014).

1145

1146 12. Dementia/Alzheimer's disease. Cases will be ascertained according to the  
 1147 Recommendations from the National Institute on Aging and the Alzheimer's  
 1148 Association workgroup (McKhann et al., 2011) or if a diagnosis of dementia is  
 1149 reported by a neurologist.

- 1150 13. Other dementias: Cases will be ascertained according to McKhann et al. 2011  
 1151 criteria (see below) or if a diagnosis of dementia is reported by a neurologist.  
 1152  
 1153 Dementia is diagnosed when there are cognitive or behavioral (neuropsychiatric)  
 1154 symptoms that: 1. Interfere with the ability to function at work or at usual activities;  
 1155 and 2. Represent a decline from previous levels of cognitive functioning; and 3.  
 1156 Are not explained by delirium or major psychiatric disorder; 4. Cognitive  
 1157 impairment is detected and diagnosed through a combination of (1) history-taking  
 1158 from the patient and a knowledgeable informant and (2) an objective cognitive  
 1159 assessment; 5. The cognitive or behavioral impairment involves a minimum of two  
 1160 domains).  
 1161  
 1162 14. Parkinson's disease. Cases will be ascertained according to the diagnostic criteria  
 1163 described by Hughes et al (Hughes AJ, et al., 1992) or if reported by a neurologist.  
 1164  
 1165 15. Unipolar depression. The diagnosis should be made according to the DSM-V  
 1166 criteria (American Psychiatric Association, 2013). In this, definition major  
 1167 depression, persistent depression, and other depressions included in Depressive  
 1168 Disorders (DSM V) are accepted. Diagnosis of depression made by primary care  
 1169 physicians or psychiatrist in participants treated with antidepressant drugs for more  
 1170 than 6 months will be accepted. If this is the case, ICD 10 (International Statistical  
 1171 Classification of Diseases and Related Health Problems, 10th version) diagnosis of  
 1172 depressive episodes are also accepted. For physicians and psychiatrists not using  
 1173 ICD 10 or DSM V, a positive response to the two questions included in the NICE  
 1174 clinical guidelines is recommended (<https://www.nice.org.uk>).  
 1175  
 1176 16. Osteoporotic fractures. Low-energy fracture is defined as the fracture produced by  
 1177 a same-level fall. Fractures will be identified from X-rays reports obtained from at  
 1178 least two radiological reports. High trauma fractures, potentially pathological  
 1179 fractures (e.g., cancer or Paget's disease), or fractures of the head, fingers and  
 1180 toes will not be considered (Bluc D, et al. 2009).  
 1181  
 1182 17. Gallstone disease or cholecystectomy: Gallstone disease will be diagnosis  
 1183 according to the findings obtained by imaging techniques including abdominal  
 1184 ultrasonography, computed tomography or magnetic resonance imaging.  
 1185 Diagnosis of cholecystectomy will require the corresponding surgical report.

1186  
 1187  
 1188  
 1189  
 1190  
 1191  
 1192  
 1193  
 1194  
 1195  
 1196  
 1197  
 1198  
 1199  
 1200  
 1201  
 1202  
 1203  
 1204  
 1205  
 1206  
 1207  
 1208  
 1209  
 1210  
 1211  
 1212  
 1213  
 1214  
 1215  
 1216  
 1217  
 1218  
 1219  
 1220

18. Symptomatic gout: Defined following the criteria of the *American College of Rheumatology*. Typically the disease first presents as arthritis that is acute and episodic, but can be recurrent. Gout can also present as chronic arthritis of one or more joints. This clinical picture is built on a foundation of an excess body burden of uric acid, manifested in part by hyperuricemia, which is defined as serum uric acid levels greater than 7.0 mg/dL (Khanna D, et al. 2012).

19. Transient Ischemic Attack: The diagnosis should be made according to the Scientific Statement of the American Heart Association/American Stroke Association Stroke Council (Easton JD et al. 2009): a transient episode of neurological dysfunction caused by focal brain, spinal cord, or retinal ischemia, without acute infarction demonstrated by neuroimaging, preferably magnetic resonance imaging techniques.

20. Cataracts surgery. Defined by a medical report of cataracts surgery.

21. Surgery for obesity. Defined by a medical report of bariatric surgery.

9.3. Intermediate markers

Changes in nutrient intake and dietary patterns will be determined by changes in the 17-item score of adherence to the energy-restricted Mediterranean diet (intensive intervention group) or the 14-item score (control group) and by changes in food and nutrient intake determined by the 143-item food frequency questionnaire administered during follow-up.

Changes in systolic and diastolic blood pressure, serum lipid concentrations, fasting glucose levels, renal function, uric acid, hemoglobin A1C, C-reactive protein, and liver function will be evaluated yearly for the duration of the intervention.

Also evaluated yearly will be the percentage of participants in each group requiring anti-hypertensive, anti-diabetic or lipid-lowering medication, results of ECGs, cognitive function, quality of life, and psychological and neuropsychological questionnaire scores.

1221 **10. Randomization procedure (random assignment)**

1222  
 1223 Between one and four weeks after the third screening visit, each recruiting center  
 1224 will randomly assign eligible candidates to one of two groups, intensive intervention  
 1225 group or usual care (control) group, using a centrally-controlled, computer-generated  
 1226 random-number system (available at: [www.predimedplus.com](http://www.predimedplus.com)). The coordinating  
 1227 center will be responsible for the randomization procedure by which participants will be  
 1228 randomly assigned with stratification by center, sex, and age group (<65, 65-70, >70  
 1229 years). Married or unmarried couples are randomized together. The recruiting centers  
 1230 enter the participants' identification criteria into the internet-based system. The system  
 1231 then automatically assigns the participants or partners of participants to their groups.  
 1232 Once this occurs, the group assigned cannot be changed. In the specific cases of  
 1233 couples in which the spouse was recruited at different times, the last spouse entering  
 1234 the study will be assigned (not randomised) to the same study arm than his/her partner  
 1235 in order to ensure high adherence to the intervention and avoid contamination and  
 1236 potential conflicts between partners of the same household.

1237

1238 **11. Intervention protocol**

1239 All participants will continue to receive usual healthcare from their family doctors  
 1240 and primary care physicians throughout the duration of the trial. At no time will  
 1241 PREDIMED-PLUS personnel deliver medical care.

1242

1243 11.1. Phases of the study for participants assigned to the intensive intervention  
 1244 program with energy-restricted Mediterranean diet (intervention group)

1245

1246 First six months

1247 In addition to the initial visit, participants assigned to the intensive intervention  
 1248 program will take part in six individual sessions (I) and 6 group sessions (G) in the first  
 1249 six months (see below):

1250

| Month 1 |   | Month 2 |   | Month 3 |   | Month 4 |   | Month 5 |   | Month 6 |   |
|---------|---|---------|---|---------|---|---------|---|---------|---|---------|---|
| G       | I | G       | I | G       | I | G       | I | G       | I | G       | I |

1251

1252 Participants will also receive a third monthly contact by way of a **telephone call**  
 1253 from a dietitian aimed at reinforcing the trial's objectives and answering any queries.

1254 During these first six months, **participants in the intervention group** are  
 1255 encouraged to aim for a reduction in their initial weight of 10% and a reduction in their  
 1256 initial waist circumference of between 5 and 10%. The aim of the trial during these first  
 1257 six months is that the **average** weight loss of the participants in the intervention group  
 1258 is above 8% and the average waist circumference reduction is above 5%. Success in  
 1259 achieving an initial weight loss is known to be a predictor of long-term weight loss. For  
 1260 this reason, all participants will be given a chart on which to record and correctly  
 1261 monitor their own weight and waist circumference.

1262 During this period they will be encouraged to substitute one meal for low-calorie  
 1263 foods and so will be offered a wide range of pleasant alternatives in keeping with the  
 1264 culinary traditions of the Mediterranean diet (see below).

1265 Finally, if by the final visit the participant has still been unable to reach the  
 1266 objectives established for this phase of the trial (month 6), he or she will take part in a  
 1267 **motivational interview session** with the dietitian in order to determine why he/she  
 1268 has not reached his or her weight-loss goal (see below), try to readdress the situation,  
 1269 and provide appropriate rescue measures.

1270

1271 Months 7-12

1272 Participants will attend one individual session (I) and one group session (G) every  
 1273 month in months 7 to 12 of the trial.

1274

| YEAR 1      | Month 7 |   | Month 8 |   | Month 9 |   | Month 10 |   | Month 11 |   | Month 12 |   |
|-------------|---------|---|---------|---|---------|---|----------|---|----------|---|----------|---|
| Months 7-12 | G       | I | G       | I | G       | I | G        | I | G        | I | G        | I |

1275

1276 They will also receive a third contact every month by way of a **telephone call**  
 1277 from a dietitian aimed at reinforcing the trial's objectives and answering any queries.

1278 The first-year follow-up visit (see below) will coincide with the last individual visit  
 1279 for this phase.

1280

1281 Years 2-6

1282 After the first year and in each of the remaining years of the trial (years 2-6), the  
 1283 participants will attend one quarterly individual session (I) and one monthly group  
 1284 session (G) and will receive two quarterly telephone calls (T), in accordance with the  
 1285 table below:

1286

1287



| Month<br>13-72 | Month<br>13 |   | Month<br>14 |   | Month<br>15 |   | Month<br>16 |   | Month<br>17 |   | Month<br>18 |   | Month<br>19 |   | Month<br>20 |   | Month<br>21 |   | Month<br>22 |   | Month<br>23 |   | Month<br>24 |   |
|----------------|-------------|---|-------------|---|-------------|---|-------------|---|-------------|---|-------------|---|-------------|---|-------------|---|-------------|---|-------------|---|-------------|---|-------------|---|
|                | G           | T | G           | T | G           | I | G           | T | G           | T | G           | I | G           | T | G           | T | G           | I | G           | T | G           | T | G           | I |

1288 M: Month

1289

1290 Months 25-36 will follow the same procedure as months 13-24, and this procedure  
1291 will be repeated for the successive years.

1292 The annual follow-up visits (see below) will coincide with the last individual session  
1293 of each year (month 24 above). Throughout the trial, any missed visits will be  
1294 reprogrammed.

1295

1296 11.2. Program of individual and group sessions for participants assigned to the energy-  
1297 restricted Mediterranean diet

1298 A) Individual visits

1299 All individual visits comprise:

1300 i) Distribution of a 17-item questionnaire of adherence to an energy-restricted  
1301 Mediterranean diet.

1302 ii) Weight and waist circumference measurement by a dietitian.

1303 iii) An individual motivational interview with the dietitian in accordance with the changes  
1304 in weight observed and the participant's scores on the 17-item adherence to  
1305 Mediterranean diet questionnaire (see below).

1306 iv) Encouragement to self-monitor weight and waist circumference. Participants are  
1307 provided charts for self-registering and self-monitoring weight and waist  
1308 circumference in accordance with the Body Weight Simulator of the National  
1309 Institute of Diabetes and Digestive and Kidney Diseases (Hall et al., 2011; National  
1310 Institute of Diabetes and Digestive and Kidney Diseases, 2012). This simulator is  
1311 also provided to participants at the first individual session with instructions on how  
1312 to use it.

1313 v) Personalized recommendations for increasing physical activity.

1314

1315 B) Group sessions

1316 At these group sessions participants are provided shopping lists, menus, recipes,  
1317 descriptions of typical components of the Mediterranean diet and advice on lifestyle  
1318 changes. PREDIMED-PLUS dietitians lead these sessions, which are attended by no  
1319 more than 20 participants. The sessions comprise:

1320

- 1321 i) An introductory talk to review the **17-item questionnaire** on adherence to the  
 1322 **energy-restricted Mediterranean diet** (see below).  
 1323 ii) A 15-minute presentation of the main aspects of the **Mediterranean diet** with  
 1324 audiovisual material prepared by the coordinating center.  
 1325 iii) Answers to any queries on any aspect of the intervention.  
 1326 iv) Delivery of the following documents:
- 1327 • Description of 4-5 low-calorie foods typical of a Mediterranean diet and adapted to  
 1328 the season.
  - 1329 • Weekly food shopping list adapted to the season.
  - 1330 • Weekly meal plan (with detailed menus) adapted to the shopping list.
  - 1331 • Recipes for the suggested menus.
- 1332 v) Delivery of gratis virgin olive oil (1 liter) and nuts (500 g) to each participant.  
 1333 vi) At the end of the session participants are reminded of the date of the next session.  
 1334

1335 11.3. Program of individual and group sessions for participants assigned to the **control**  
 1336 **group.**

1337 **Control** group participants receive usual medical care from medical staff at their health  
 1338 institutions. The importance of their attending usual medical visits will be stressed to  
 1339 them. Participants receive all the written information related to the **Mediterranean diet**  
 1340 used in the PREDIMED trial as well as leaflets with general lifestyle recommendations  
 1341 for managing the metabolic syndrome. At the beginning of the study, a group session  
 1342 and an individual session is held at which dietitians deliver documents similar to those  
 1343 used in the PREDIMED trial (shopping lists, recipes, menus, and descriptions of  
 1344 Mediterranean diet components). The dietitians do not provide participants in the  
 1345 control group with instructions on how to lose weight, as this is the responsibility of their  
 1346 family doctors or specialists (usual care). They are also offered a group session every  
 1347 6 months. At the initial visit and at each 6-month group session, participants are  
 1348 provided free virgin olive oil (6 liters every 6 months) and nuts (3 kg every 6 months). In  
 1349 order to encourage compliance with the trial, supply of olive oil and nuts to the  
 1350 participants is contingent on their attending these sessions. The 6-month group  
 1351 sessions include tips on how to follow the **Mediterranean diet** to prevent CVD but  
 1352 advice on calorie restriction, weight loss or increased physical activity is not given and  
 1353 no such objectives are entertained.

1354

1355 11.4. Dietary and lifestyle intervention

1356 The **Intervention Committee** led by Jordi Salas-Salvadó coordinates the dietary and  
 1357 lifestyle intervention. This committee is made up of four coordinators (Jordi Salas-  
 1358 Salvadó, Montse Fitó, Ramón Estruch and Miguel Ángel Martínez-Gonzalez), three of  
 1359 whom will be responsible for the three intervention sub-committees: Dietary  
 1360 Intervention (chair: Jordi Salas-Salvadó; members: Nancy Babio, Emilio Ros and Ana  
 1361 Sánchez-Tainta); Physical Activity (chair: Montse Fitó; members: Helmut Schröder,  
 1362 Ascensión Marcos, Miguel A. Martínez-González, Dolores Corella, and Julia  
 1363 Warnberg); and Behavior Treatment (chair: Ramon Estruch; members: Fernando  
 1364 Fernández-Aranda, Cristina Botella and Jordi Salas-Salvadó). This Committee is  
 1365 responsible for designing the lifestyle intervention program for the intensive intervention  
 1366 group and ensuring that it is implemented correctly. Miguel Ruiz-Canela, Miguel A.  
 1367 Martínez-González and Jordi Salas-Salvadó are responsible for ethical considerations.

1368

1369 Dietary recommendations

1370 Many aspects of a diet's quality can affect body weight and the risk of obesity-related  
 1371 illnesses to a greater extent than relative macronutrient content (Mozaffarian et al.,  
 1372 2011; Ludwig, 2012). In recommendations given to participants, two food groups (A  
 1373 and B) will be clearly differentiated:

1374 A) Traditional dietary patterns based on whole foods or minimally processed foods,  
 1375 such as the **Mediterranean diet**, which incorporates many cardioprotective foods  
 1376 and few harmful ones. The consumption of virgin olive oil, nuts (especially walnuts),  
 1377 fruits and vegetables, salads, whole grains, fiber-rich foods and low-fat yogurts  
 1378 have been consistently associated with weight loss or lower weight gain (Martinez-  
 1379 Gonzalez, Bes-Rastrollo, 2011; Mozaffarian et al., 2011).

1380 B) On the other hand, sugar-sweetened beverages, fast foods, refined grain products  
 1381 (especially white bread, which is widely consumed in Spain), white rice, pasta  
 1382 (except for whole-grain pasta), French fries, potatoes, trans fats (mainly present in  
 1383 commercial bakery products in Spain), sweets, cakes, pies, sugar, precooked  
 1384 meals, sausages or cold cuts of processed meats, and patés have been  
 1385 consistently associated with weight gain (Schulze et al., 2006; Mozaffarian et al.,  
 1386 2011).

1387

1388 The main focus of the intensive intervention program (intervention group) lies  
 1389 therefore in the diet's overall quality, with the aim of avoiding foods from the B group  
 1390 and replacing them with foods from the A group.

1391 In addition, by taking into account energy requirements estimates according to the  
 1392 Institute of Medicine equation as well as the participants' basal metabolic rate and level  
 1393 of physical activity, a reduction in energy intake of roughly 600 kcal (about 30% of  
 1394 estimated energy requirements) is envisaged. The energy-restricted Mediterranean diet  
 1395 involves reduced consumption of meat and cold cuts, sugars, white bread, processed  
 1396 fruit juices and sugary beverages, and other foods from the B group, as follows:  
 1397  
 1398

| ENERGY-RESTRICTED MEDITERRANEAN DIET |                                                                                       |
|--------------------------------------|---------------------------------------------------------------------------------------|
| NUTRIENT                             | RECOMMENDED INTAKE                                                                    |
| Calories <sup>1</sup>                | Reduction of ≈600 kcal/day (about 30%) from usual intake                              |
| Total fat <sup>2</sup>               | 35-40 % of total calories                                                             |
| Saturated Fatty Acids                | 8-10 % of total calories                                                              |
| Monounsaturated Fatty Acids          | > 20 % of total calories                                                              |
| Polyunsaturated Fatty Acids          | > 10 % of total calories                                                              |
| Cholesterol <sup>3</sup>             | < 300 mg/day                                                                          |
| Proteins <sup>4</sup>                | Approximately <b>20</b> % of total calories                                           |
| Carbohydrates <sup>5</sup>           | <b>40-45</b> % or more of total calories (of low glycemic index)                      |
| Sodium chloride                      | No more than 100 mmol/day (roughly 2.4 g of sodium or roughly 6 g of sodium chloride) |
| Dietary fiber                        | <b>30-35</b> g/day                                                                    |

- 1399
- 1400 1. A reduction in calories of 500 to 1,000 kcal/ day will help to achieve a weight loss of  
 1401 0.5 to 1 kg/week.  
 1402 Alcohol provides unnecessary calories and displaces the intake of more nutrient-  
 1403 dense foods. Not only does the consumption of alcohol increase the number of  
 1404 calories in one's diet but in epidemiological and experimental studies it has also  
 1405 been associated with obesity. For this reason, although the 17-item adherence to  
 1406 the Mediterranean diet questionnaire contains one item for the consumption of  
 1407 wine, the impact of calories from alcohol on the overall calorie intake should be  
 1408 carefully evaluated and monitored and the consumption of alcoholic beverages  
 1409 other than wine should be avoided.  
 1410
  - 1411 2. The consumption of wine permitted is one or two glasses per day for women  
 1412 and two or three glasses per day for men. The consumption of other sources of  
 1413 alcohol other than wine is discouraged. Red wine is preferred over other types and  
 1414 it is recommended that the wine be consumed at mealtimes (Gea et al., 2014).  
 1415
  - 1416 3. Fat restriction involves fat from animal foods. Olive oil and nuts must be the  
 1417 preferred sources of fat.

1418

1419 4. Proteins should be derived first from plant and second from lean animal sources  
1420 (like fish or poultry).

1421

1422 5. Carbohydrates should be derived from solid, minimally processed and fiber-rich  
1423 foods with a low glycemic index, such as vegetables, fruits and whole grains, all of  
1424 which are good sources of vitamins, minerals, and fiber. A diet that is rich in soluble  
1425 fiber such as oat bran, legumes, and most fruits and vegetables may be effective in  
1426 reducing blood cholesterol levels and insulin resistance. A diet that is high in all  
1427 types of fiber may also help to control weight by promoting satiety and maintaining  
1428 lower levels of total energy intake.

1429

1430 6. During weight loss, attention should be given to maintaining an adequate intake  
1431 of vitamins and minerals. Maintaining the recommended calcium intake of 1,000 to  
1432 1,500 mg/day is especially important for postmenopausal women who may be at  
1433 risk of osteoporosis.

1434

1435 Participants in the intensive intervention group receive counseling to help them  
1436 progressively increase their compliance with the following 17 objectives (the **17-item**  
1437 **questionnaire on adherence to the energy-restricted Mediterranean diet**). **One**  
1438 **point** will be awarded for **each objective met**:

1439

1440 1. Use only extra-virgin olive oil for cooking, salad dressings, and spreads.

1441 2. Consume  $\geq 3$  portions of fruit per day.

1442 3. Consume  $\geq 2$  portions of vegetables/garden produce per day (at least 1 portion raw  
1443 or in a salad).

1444 4. Reduce consumption of white bread to  $\leq 1$  serving/day (1 serving = 75 g).

1445 5. Consume whole grain cereals and pasta  $\geq 5$  times per week.

1446 6. Consume  $\leq 1$  serving (1 serving = 100-150 g) of red meat, hamburgers, or meat  
1447 products (ham, sausage, etc.) per week.

1448 7. Consume less than 1 serving of butter or cream per week (1 serving = 12 g).

1449 8. Consume less than one sugary beverage or sugar-sweetened fruit juice per week.

1450 9. Consume  $\geq 3$  servings of legumes per week (1 serving = 150 g).

1451 10. Consume  $\geq 3$  servings of fish or shellfish per week (1 serving = 100-150 g fish, or 4-  
1452 5 units or 200 g shellfish).

- 1453 11. Consume < 3 sweets or pastries, such as cakes, cookies, sponge cake, or custard,  
1454 per week.
- 1455 12. Consume  $\geq$  3 servings of nuts (including peanuts) per week (1 serving = 30 g).
- 1456 13. Consume chicken, turkey or rabbit meat instead of beef, pork, hamburgers or  
1457 sausages.
- 1458 14. Use *sofrito* (sauce made with tomato and onion, leek or garlic, simmered in olive  
1459 oil)  $\geq$  2 times per week.
- 1460 15. Do not add sugar to beverages (coffee, tea); instead, replace sugar with non-caloric  
1461 artificial sweeteners.
- 1462 16. Reduce consumption of pasta or rice <3 servings per week (unless the pasta or  
1463 rice are whole grain products).
- 1464 17. Consume 2-3 glasses of wine (200 mL) per day (men) or 1-2 glasses of wine per  
1465 day (women).

1466

1467 The intervention tool for the control group, on the other hand, is the PREDIMED  
1468 14-item adherence questionnaire to the non-energy-restricted Mediterranean diet  
1469 (Schroeder et al., 2011). However, the 17-item questionnaire is also collected in control  
1470 group participants for comparison purposes.

1471

#### 1472 Physical exercise recommendations

1473 Participants are encouraged to gradually increase their level of physical activity to at  
1474 least 45 minutes per day after 6 months of intervention and their progress is monitored.  
1475 The physical activity program includes aerobic activities, such as gentle walking or any  
1476 equivalent activity of moderate intensity and resistance training (Fernández et al.,  
1477 2012). The dietitians adapt their recommendations to personal preferences and  
1478 encourage participants to switch between activities with the same metabolic  
1479 equivalence of tasks.

1480

#### 1481 Psycho-behavioral therapy

1482 Participants are instructed on strategies and provided tools for solving problems  
1483 associated with consuming high calorie foods and performing sedentary activities. They  
1484 are encouraged to learn how to recognize lack of control on food intake under stressful  
1485 or anxious situations and how to exercise self-control.

1486

1487

1488

1489 Recommendations on the use of tobacco

1490 The PREDIMED-PLUS dietitians will make no recommendations on the use of tobacco.  
1491 This is the responsibility of the medical professionals in the primary care centers in  
1492 accordance with usual medical practice.

1493

1494 Individual motivational interviews

1495 Personal interviews with the dietitian at each individual visit are adapted to the  
1496 participant's clinical conditions, preferences and beliefs. Dietary changes are  
1497 introduced in order to achieve the recommended diet for each participant and suitable  
1498 lifestyle changes are incorporated. Objectives are accorded via a negotiated  
1499 agreement between the two parties (dietitian and participant) depending on what  
1500 participants consider to be an attainable goal. The main objective is to change not only  
1501 the participant's consumption of certain foods but also his or her overall dietary pattern.  
1502 Attention can vary between changing portion sizes, changing the frequency of dietary  
1503 components, and changing cooking methods.

1504 Achievements made in the previous months, however minor, are always considered  
1505 an essential support mechanism for improving self-esteem and self-reward. Special  
1506 care is taken to ensure that participants do not receive contradictory dietary advice  
1507 from health professionals external to the PREDIMED-PLUS trial.

1508 As described, each participant receives oral and written information on the food  
1509 components and culinary customs of the **energy-restricted Mediterranean diet**, as  
1510 well as charts for self-registering and self-monitoring changes in weight and waist  
1511 circumference at each visit.

1512 Participants who during the active weight-loss phase have observed a lower weight  
1513 loss than expected or who have not maintained the weight loss they had achieved  
1514 receive special reinforcement and a series of rescue measures to help them achieve  
1515 weight loss and weight-loss maintenance. In such cases, agreements are negotiated  
1516 between the dietitians and the participants.

1517

1518 Role of the dietitians

1519 The PREDIMED-PLUS dietitians are directly responsible for the dietary intervention.  
1520 They have been specifically trained and certified to deliver the PREDIMED-PLUS  
1521 intervention protocol. All intervention procedures are conducted in accordance with the  
1522 PREDIMED-PLUS operation's manual. Throughout the study, annual meetings will be  
1523 held at which the dietitians will discuss any problems they may have identified and find

1524 possible solutions. The dietitians and trial coordinators will discuss any problems  
 1525 arising during the trial, thus ensuring a process of continuous feedback.

1526

1527 **12. Training and calibration procedures**

1528 A general trial operations manual and staff training documents are set forth to  
 1529 ensure standardized procedures across the various recruiting centers. Before  
 1530 implementation of the protocol, study personnel attended a 3-day training course at the  
 1531 coordinating center. This included theoretical and practical group discussions with  
 1532 experts on lifestyle interventions in order to convey the goals of the study, develop all  
 1533 the specific aspects involved in implementing the intervention, and impart training on  
 1534 the informed-consent process, anthropometric and blood pressure measurements, data  
 1535 collection by optical scanning or online systems, and biological sample collection and  
 1536 processing. The abilities of all contracted personnel were evaluated at personal  
 1537 interviews during this training course. The research team stressed the importance of  
 1538 creating a trusting and empathic relationship with the participants and paying attention  
 1539 to their individual needs in order to maximize their motivation and retention into the  
 1540 trial. Study personnel keep a copy of the operations manual detailing all the training  
 1541 points. In addition, all the personnel responsible for the intervention will attend annual  
 1542 meetings and be in constant contact with the principal investigators in order to ensure  
 1543 standardized implementation of the trial protocol. In accordance with the protocol, all  
 1544 scales and other measurement instruments will be periodically calibrated.

1545

1546 **13. Retention and compliance with strategies and supervision procedures**

1547 The recruitment of participants and the **compliance rates for the intervention**  
 1548 **strategies** are crucial to the success of a trial of this nature. For this reason, a run-in  
 1549 (pre-evaluation) period **prior to randomization** was planned: only participants who  
 1550 adhere to **all** the requirements of the protocol during the run-in period are accepted into  
 1551 the trial. The lag time between the end of the run-in period and the start of the  
 1552 intervention ranges from one week to one month.

1553 The researchers involved in this trial have already gained invaluable experience in  
 1554 managing long-term trials through the PREDIMED trial, wherein they developed  
 1555 strategies for ensuring participants' compliance with the protocol and encouraging their  
 1556 **long-term retention**. We understand that this is a particularly sensitive aspect for  
 1557 participants in the control group. Therefore, at each group session of both the intensive  
 1558 intervention group and the usual care group, virgin olive oil and mixed nuts is provided  
 1559 at no cost to all participants. Our experience in the PREDIMED trial showed that such



1560 gifts, especially the virgin olive oil, greatly helped to encourage participants' retention.  
1561 Other retention strategies include providing feedback on findings during follow-up to the  
1562 participants' usual health-care providers as well as supplying other non-coercive  
1563 material incentives for both groups. Additionally, in the intensive intervention group,  
1564 where significant weight-loss is anticipated, contact with participants is ongoing and  
1565 flexible interventions and rescue measures tailored to the participants' needs are  
1566 implemented. Self-control, self-reward and self-monitoring techniques will also  
1567 reinforce participants' compliance with the intervention. Finally, the intervention is  
1568 adapted to the needs of the participants, which should encourage compliance.

1569

#### 1570 **14. Biological samples and laboratory procedures**

1571 The nursing staff contracted at each recruiting center is responsible for collecting,  
1572 processing and storing the biological samples in freezers at a temperature of -80°C.  
1573 Blood samples are collected at the recruiting centers in the same way as they are  
1574 collected at the participants' usual healthcare centers. In addition, 55.5 ml of blood are  
1575 extracted and collected in the following tubes: two 10 ml K2E EDTA tubes; one 4.5 ml  
1576 citrate tube; and two 10 ml and 6 ml gel serum separator tubes. The serum, citrate  
1577 plasma and EDTA plasma samples are distributed in aliquots of 200 µl and 500 µl and  
1578 stored at -80°C for future analyses at the recruiting centers. For the intensive  
1579 intervention group, the biochemical measurements will be performed in a blind fashion  
1580 and in the same batch for consecutive samples of each participant. Each recruiting  
1581 center has an ultra-low-temperature freezer with enough capacity to store biological  
1582 samples until final delivery. All biological samples are processed at each recruiting  
1583 center no later than one hour after extraction. During transportation from the primary  
1584 care centers to the laboratories, the biological samples are stored at 4°C in a portable  
1585 cooler. Urine tests are conducted at the recruiting centers in the same way they are  
1586 conducted at the participants' usual healthcare centers in accordance with the specific  
1587 PREDIMED-PLUS protocol for collecting biological samples.

1588

#### 1589 **15. Quality control**

1590 The general database for the PREDIMED-PLUS trial will be managed and  
1591 maintained by the research group of the IMIM Institute (CIBERObn). The food-  
1592 frequency questionnaires and the food records, as well as the neuropsychological  
1593 questionnaires, quality of life scales and psychopathological questionnaires to be  
1594 completed at home are processed and managed at the University of Navarra. Data  
1595 collected from accelerometers to measure physical activity are processed at the

1596 Malaga recruiting center in collaboration with the CSIC/UAM. These data are sent  
1597 every three months to the IMIM, where they are incorporated into the General  
1598 Database. Event detection data, collected from information gathered during the  
1599 intervention and at the follow-up visits, will be introduced into specific forms at the  
1600 recruiting centers, preferably using online systems, and sent at least once a month to  
1601 the data manager at the IMIM, who will send monthly reports of missing or  
1602 inappropriate entries back to the recruiting center coordinators to solve any raised  
1603 queries. The IMIM also sends monthly reports to the steering committee. The steering  
1604 committee has been set up to ensure the quality of the project and correct any flaws or  
1605 divergences. This committee is made up of Jordi Salas-Salvadó (PREDIMED-Plus  
1606 coordinator), Miguel Angel Martínez-González (Principal Investigator of the ERC grant),  
1607 Ramón Estruch, Montserrat Fitó, Emilio Ros, and Dolores Corella. At every annual  
1608 PREDIMED-PLUS meeting, the IMIM will conduct a current data management  
1609 information session. An annual summary will be sent to the recruiting center  
1610 coordinator for distribution to all groups.

1611 To reduce data entry expenses and speed up processing, the questionnaires and  
1612 data forms are processed by optical scanning or by online data transfer forms. The  
1613 data forms are entered in duplicate and missing data checks are performed. All forms  
1614 sent to another recruiting center must be photocopied and stored at that center. After  
1615 data entry, cross-form edit checks are performed and any data inconsistencies are  
1616 identified. To detect any still-unsolved problems, audits will be run periodically at each  
1617 recruiting center. Reports will be drafted to summarize any problems in the database  
1618 and provide an additional step to ensure the quality and accuracy of the data. To  
1619 minimize the possibility of error, a detailed operations manual has been prepared.

1620 Annual staff training meetings will be conducted. The data manager and an audit  
1621 committee will evaluate the performance of each recruiting center. Appropriate new  
1622 procedures and corrective measures will be implemented whenever deficiencies are  
1623 noted. Until the end of the trial, all field centers will be masked to the trial outcome data  
1624 except for the two trial statisticians, one in Navarra (M.A. Martínez-González) and one  
1625 at the IMIM in Barcelona (Joan Vila), who will always perform the statistical analyses in  
1626 duplicate with two statistical analysis units. Because of the nature of the trial, however,  
1627 the dietitians at each field center know which intervention has been assigned to each  
1628 participant. The medical doctors who will prepare the annual report on the *ad hoc*  
1629 review of the participants' medical records will be blinded to group assignment, as will  
1630 the **Clinical Event Ascertainment Committee**. The members of the Steering  
1631 Committee, who will attend the meetings of the Data and Safety Monitoring Board, will

1632 also remain blinded to the results of intermediate analyses throughout the trial. The  
1633 Steering Committee will be informed of the total number of events observed but not of  
1634 the groups in which they occurred.  
1635

1636 **STATISTICAL ANALYSIS PLAN**

1637 All analyses will be performed on an intention-to-treat basis. Miguel A. Martínez-  
 1638 González will be the senior statistician responsible for the statistical analysis plan. All  
 1639 major data analyses will be conducted under his supervision. Statistical analyses for  
 1640 the main aims of the study will be also conducted in duplicate by the center at IMIM,  
 1641 Barcelona (responsible statistician at IMIM: Joan Vila).

1642  
 1643 **Analysis of the effect of the intervention**

1644 Since the data take into account time to the event, Cox's regression models will be  
 1645 used to determine the effect of the intervention on the incidence of cardiovascular  
 1646 events. For changes in weight and waist circumference, mixed models of analysis of  
 1647 variance and generalized estimating equations (GEE) will be used. These models will  
 1648 include the following adjustment covariates:

- 1649 1) All factors that, according to the scientific literature, are related to the event; and
- 1650 2) All factors that reach statistical significance in univariate analyses.

1651  
 1652 In these models we will evaluate: 1) the proportional hazards assumption; 2) the  
 1653 linearity of the continuous variables, using smoothing spline methods; 3) the effect of  
 1654 extreme observations on the estimation of parameters, by calculating delta-beta  
 1655 values. The use of further approaches (i.e. normalizing transformations, stratified  
 1656 analyses, etc.) will depend on the results obtained above. Given that participants will  
 1657 be clustered by recruiting centers, some degree of correlation structure may be  
 1658 expected. Center will therefore be included as a stratification variable, including frailty  
 1659 estimates, in the Cox regression models. The goodness-of-fit of the models will be  
 1660 examined using the modified Hosmer-Lemeshow test for survival studies. Robust  
 1661 estimators of variance that account for the clustering effect of members of the same  
 1662 household (the second member is not randomized for feasibility reasons) will be used  
 1663 to take into account the intra-cluster correlation. Sensitivity analyses will be conducted  
 1664 after excluding the second (non-randomized) members of the same household. In  
 1665 addition to the stratification by center, all Cox models will be also stratified by sex and  
 1666 educational level.

1667  
 1668 **Interim analyses and stopping rules**

1669 Data from the PREDIMED-PLUS trial will be analyzed after 3 years of median follow-  
 1670 up, after 5 years of median follow-up, and at the end of the trial. For methodological  
 1671 reasons but especially for ethical ones, suitable follow-up for a trial must include at

1672 least one interim analysis (Schulz, Grimes, 2005). However, to preserve an overall  
 1673 alpha error of 0.05, interim analyses have to be penalized. We will use the O'Brien and  
 1674 Fleming boundaries (O'Brien and Fleming, 1979). With this method, the boundaries are  
 1675 stricter at the earlier stages of the study than at the later ones. Applying this rule leads  
 1676 to the following p values for stopping the trial:

1677 First interim analysis (median follow-up: 3 years); threshold p value: 0.0005.

1678 Second interim analysis (median follow-up: 5 years); p value: 0.014.

1679 Final analysis (median follow-up: 8 years); p value: 0.045

1680

1681 These p values should not be considered compulsory for stopping the trial but  
 1682 guidelines for guaranteeing the security of the data. In making their decision, the Data  
 1683 and Safety Monitoring Board must take into account, for example, the size of the effect,  
 1684 the follow-up time at each recruiting center, the heterogeneity between the effects at  
 1685 the recruiting centers, as well as evidence from other current trials and observational  
 1686 studies. All the above must be taken into consideration when deciding either to  
 1687 continue or to interrupt the trial after each interim analysis. Reasons for interrupting the  
 1688 trial include: 1) convincing evidence of the beneficial effect of the intervention (the trial  
 1689 will be stopped only if the effect of the intervention is great); 2) convincing evidence of  
 1690 a harmful effect from the intervention; 3) results suggesting it is highly unlikely that the  
 1691 proposed hypothesis will be accepted due to, for example, a very small effect of the  
 1692 intervention that dramatically affects the trial's statistical power.

1693

#### 1694 **Estimations of sample size**

1695 We will determine the effect of the intensive weight-loss lifestyle intervention with  
 1696 an energy-restricted **Mediterranean diet** on the two primary outcomes below,  
 1697 assuming a two-tailed alpha error of 0.05.

1698

1699 1. Effect of the intervention on the **incident CVD** (non-fatal myocardial infarction,  
 1700 non-fatal stroke, and cardiovascular death). The cumulative projected incidence after  
 1701 including as primary events all non-fatal acute myocardial infarctions and all  
 1702 microinfarctions with positive high-sensitivity troponin tests after 6 years will be at least  
 1703 10% in the control group, if we take into account the results of the PREDIMED trial  
 1704 after 4.8 years (which did not include high-sensitivity troponin tests). The hazard ratio  
 1705 (HR) for the combined primary endpoint is anticipated to be 0.70 (Estruch et al., 2013)  
 1706 and will probably be even lower (greater protective effect) if we consider that in the  
 1707 PREDIMED trial no energy restriction was implemented, physical activity was not

1708 encouraged, and weight loss was not a target of the intervention. Under these  
 1709 assumptions, therefore, even if the dropout rates were to reach 20%, the required  
 1710 sample size would be 2,400 per group (see Figure 3). To be conservative, however, we  
 1711 aim to recruit 6,000 participants and assign 3,000 participants to each group. The  
 1712 participants will be recruited at 20 recruiting centers, each of which will have the goal of  
 1713 recruiting, educating and following approximately 300 participants, 150 of whom will be  
 1714 in the control group and 150 in the intensive intervention group.

1715

1716 **FIGURE 3. Estimation of the sample size required per intervention group in the**  
 1717 **PREDIMED-PLUS trial**

1718

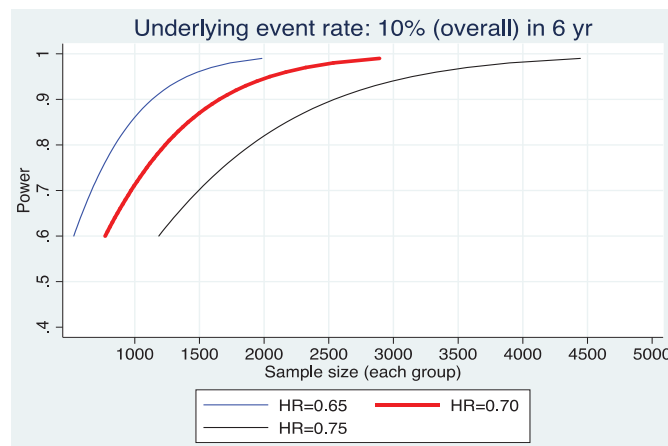

1719

1720 2. Effect of the intervention on **weight change**. Based on previous studies, we can  
 1721 expect a minimum weight change for participants in the control group and a weight loss  
 1722 of 3-4.5 kg for those in the intensive lifestyle intervention group, with a standard  
 1723 deviation of 8 kg (Shai et al., 2008; Sacks et al., 2009; Wing, 2010). If we assume our  
 1724 intervention will have only a small effect on weight change and then calculate sample  
 1725 size according to a weight change of 1 kg in the usual care group, a weight change of 3  
 1726 kg in the intensive lifestyle intervention group, and a standard deviation of 8 kg, in order  
 1727 to achieve a statistical power of 0.80 we would need a sample size of only 337 in each  
 1728 group. Since the number of participants to be recruited is much higher than this figure,  
 1729 the statistical power needed to reach this objective is largely guaranteed.

1730

1731 **STRENGTHS AND LIMITATIONS**

1732 **Strengths**

1733 A. This trial provides a multidisciplinary approach to tackling the serious problem  
1734 presented by the overweight and obesity epidemic. Our target group comprises obese  
1735 or overweight adults, who represent an increasing proportion of the general population.  
1736 For these subjects, an intervention based on a profound lifestyle change incorporating  
1737 improvements in the dietary pattern, weight loss, behavioral therapy, and increased  
1738 physical activity can be a novel and useful model for reducing the burden of obesity  
1739 and associated diseases, thus contributing to the sustainability of the healthcare  
1740 system. The trial clearly addresses priority objectives of the public healthcare system  
1741 since it tackles both the principal epidemic of our times (overweight and obesity) and  
1742 the principal cause of death around the world (CVD).

1743 B. This innovative proposal presents a novel paradigm for nutritional recommendations  
1744 aimed at achieving weight loss, i.e., a traditional dietary pattern characterized by a  
1745 moderate-to-high fat content. We believe this new approach will help improve  
1746 compliance with the intervention and overcome the main challenge of any dietary  
1747 interventions aimed at fighting overweight and obesity: long-term weight loss  
1748 maintenance (Shai et al., 2008; Beunza et al., 2010; Romaguera et al., 2010).

1749 C. The intervention is well structured and the trial is suitably designed for determining  
1750 the effect of the intervention on the main clinical outcomes. Moreover, since the trial is  
1751 conducted in the context of primary healthcare and incorporates epidemiological,  
1752 clinical and basic aspects, it has a high capacity for both transferability and  
1753 reproducibility.

1754 D. The research team includes investigators with invaluable experience in lifestyle  
1755 intervention trials (e.g., PREDIMED). As these investigators come from a wide range of  
1756 fields, their work will be complementary and the trial's chances of success will be  
1757 enhanced. All these reasons, together with the success and achievements of the  
1758 PREDIMED trial, attest to the viability of this trial proposal.

1759 E. From a strategic perspective, this is a timely proposal since it provides continuity for  
1760 the collaborative project in which most CIBEROBN centers have participated, i.e.,  
1761 PREDIMED.

1762

1763

1764

1765 **Limitations**

1766 A. Our study will enroll participants aged between 55 and 75 years old. This may  
1767 preclude generalization to younger age groups.

1768 B. In a large-scale clinical trial, one limitation to consider is participants' dropout rates.  
1769 However, we hope to ensure compliance in both groups by: a) providing free foods  
1770 (olive oil and mixed nuts); b) establishing personal relationships with each participant  
1771 via individual and group sessions; c) administering, at the start of the study, the  
1772 Prochaska and DiClemente Stages of Change Model, by which a low predicted  
1773 probability of changing dietary habits will be a criterion for exclusion; and d)  
1774 establishing, at the start of the study, a one-month run-in period in order to identify and  
1775 select participants with a greater likelihood of compliance with the protocol and  
1776 retention into the study (see section 7.2.3).

1777 C. Homogeneity of the interventions is difficult because it is based on three  
1778 components: diet, physical exercise, and behavior. For this reason we have developed  
1779 a detailed protocol for implementing the intervention and have established a committee  
1780 for each intervention component. We also conducted a staff training session at the  
1781 beginning of the study and will conduct annual follow-up sessions throughout.

1782

### 1783 **COMMITTEES AND GOVERNANCE**

1784 The PREDIMED-PLUS **Executive Committee** includes the principal investigators  
1785 from all the participating centers (see Annex 1). It will provide scientific and strategic  
1786 orientation for decision-making and will be responsible for designing, implementing and  
1787 publishing the study's protocol and guaranteeing the quality of its implementation and  
1788 management. It will determine its own guidelines and approve the criteria and  
1789 guidelines of the other committees within the study. It will convene at least twice a year  
1790 to discuss and report on the study's progress.

1791 The **Steering Committee**, made up of Jordi Salas Salvadó (Chair), Miguel Angel  
1792 Martínez-González (PI of the ERC-Advanced Research Grant), Ramón Estruch,  
1793 Montserrat Fitó, Emilio Ros, and Dolores Corella, is responsible for ensuring the quality  
1794 of the project and correcting any flaws or divergences that may be detected.

1795

### 1796 **Data Safety and Monitoring Board**

1797 To ensure the smooth running of the trial and the safety of participants, an  
1798 Independent **Data Safety and Monitoring Board** has been set up. This Board is  
1799 made up of: Chairman, Meir J. Stampfer (Harvard School of Public Health); members  
1800 Joan Sabaté (Loma Linda University), Arne Astrup (Copenhagen University), and  
1801 Francisco Fernandez-Avilés (Universidad Complutense of Madrid); and honorary



1802 member Xavier Pi-Sunyer (Columbia University). The Board will convene at least once  
1803 a year to review the implementation of the protocol and monitor the trial's progress. It  
1804 will examine the competence of each recruiting center, evaluate their compliance with  
1805 the study's objectives, and decide whether they may continue in the trial.

1806 In addition, a report will be mailed periodically by the PREDIMED-PLUS Steering  
1807 Committee to the Board members with relevant statistical analyses for judging on the  
1808 continuation of the PREDIMED-PLUS trial. Throughout the study, the Board members  
1809 can request any statistical analysis on a blinded or unblinded basis. The Board may  
1810 recommend termination of the trial at any time if an unacceptable incidence of adverse  
1811 events or significant differences in mortality between study groups are observed. The  
1812 Executive Committee of the PREDIMED-PLUS trial, however, will make the final  
1813 decision.

1814

#### 1815 **SOURCES OF FUNDING AND ADMINISTRATIVE ISSUES**

1816 This study was supported by the European Research Council (Advanced Research Grant 2013-  
1817 2018; 340918) grant to Miguel Ángel Martínez-Gonzalez and by the official funding agency for  
1818 biomedical research of the Spanish government, Instituto de Salud Carlos III (ISCIII) through the  
1819 Fondo de Investigación para la Salud (FIS) and CIBEROBN, which is co-funded by the European  
1820 Regional Development Fund.

1821

#### 1822 **Trial's website**

1823 <http://www.predimedplus.com>

1824

#### 1825 **Contact's name and address**

1826

1827 Jordi Salas-Salvadó, MD, PhD. Human Nutrition Unit. Faculty of Medicine and Health Sciences,  
1828 Universitat Rovira i Virgili, C/ Sant Llorenç, 21, 43201 Reus (Spain). Telephone number: +34  
1829 977759312; Fax number: +34 977759322. E-mail: jordi.salas@urv.cat.

1830 Prof. Miguel A. Martínez-González, MD, PhD, MPH, Department of Preventive Medicine and  
1831 Public Health, Facultad de Medicina–Clínica Universidad de Navarra, Irunlarrea 1, 31008  
1832 Pamplona, Spain. Phone: +34 636 355 333, E-mail: mamartinez@unav.es

1833

1834

#### 1835 **PREDIMED-PLUS Registration**

1836 The PREDIMED--Plus trial was registered at the International Standard Randomized  
1837 Controlled Trial (ISRCT; <http://www.isrctn.com/ISRCTN89898870>) with number  
1838 89898870 and a registration date of 24 July 2014.  
1839

1840 **REFERENCES**

1841 American Diabetes Association. Standards of medical care in diabetes-2014. *Diabetes Care*.  
 1842 2014 Jan;37 Suppl 1:S14-80.  
 1843  
 1844 Alberti KG, Eckel RH, Grundy SM, et al. Harmonizing the metabolic syndrome: a joint interim  
 1845 statement of the International Diabetes Federation Task Force on Epidemiology and Prevention;  
 1846 National Heart, Lung, and Blood Institute; American Heart Association; World Heart Federation;  
 1847 International Atherosclerosis Society; and International Association for the Study of Obesity.  
 1848 *Circulation* 2009;120:1640-5.  
 1849  
 1850 Alonso J, Prieto L, Anto JM. [The Spanish version of the SF-36 Health Survey (the SF-36 health  
 1851 questionnaire): an instrument for measuring clinical results]. *Med Clin (Barc)* 1995;104:771-6.  
 1852  
 1853 Alonso J, Regidor E, Barrio G, Prieto L, Rodriguez C, de la Fuente L. [Population reference  
 1854 values of the Spanish version of the Health Questionnaire SF-36]. *Med Clin (Barc)* 1998;111:  
 1855 410-6.  
 1856  
 1857 American Dietetic Association. Adult Weight Management Evidence-Based Nutrition Practice  
 1858 Guideline. Ver [http://www.adaevidencelibrary.com/](http://www.adaevidencelibrary.com/topic.cfm?cat=2798&auth=1) topic.cfm?cat=2798 &auth=1, consulted  
 1859 12/4/2012.  
 1860  
 1861 American Psychiatry Association. Diagnostic and Statistical Manual of Mental Disorders, Fifth  
 1862 Edition (DSM-5) Arlington, VA, American Psychiatric Association, 2013.  
 1863  
 1864 Bao Y, Han J, Hu FB, Giovannucci EL, Stampfer MJ, Willett WC, Fuchs CS. Association of nut  
 1865 consumption with total and cause-specific mortality. *N Engl J Med* 2013;369:2001-11.  
 1866  
 1867 Basterra-Gortari FJ, Beunza JJ, Bes-Rastrollo M, Toledo E, García-López M, Martínez-  
 1868 González MA. [Increasing trend in the prevalence of morbid obesity in Spain: from 1.8 to 6.1 per  
 1869 thousand in 14 years]. *Rev Esp Cardiol* 2011;64:424-6.  
 1870  
 1871 Benton AL, Hamsher, K, Sivan AB. Multilingual Aphasia Examination (3rd ed.). San Antonio,  
 1872 Texas: Psychological Corporation; 1994.  
 1873  
 1874 Berrington de Gonzalez A, Hartge P, Cerhan JR, et al. Body-mass index and mortality among  
 1875 1.46 million white adults. *N Engl J Med* 2010;363:2211-9.  
 1876

- 1877 Bes-Rastrollo M, Sabaté J, Gómez-Gracia E, Alonso A, Martínez JA, Martínez-González MA.  
 1878 Nut consumption and weight gain in a Mediterranean cohort: The SUN study. *Obesity* (Silver  
 1879 Spring). 2007 Jan;15(1):107-16.  
 1880  
 1881 Beunza JJ, Toledo E, Hu FB, Bes-Rastrollo M, Serrano-Martínez M, Sánchez-Villegas A,  
 1882 Martínez JA, Martínez-González MA. Adherence to the Mediterranean diet, long-term weight  
 1883 change, and incident overweight or obesity: the Seguimiento Universidad de Navarra (SUN)  
 1884 cohort. *Am J Clin Nutr* 2010;92:1484-93.  
 1885  
 1886 Benkhalti F, Prost J, Paz E, Perez-Jimenez F, El Modafar C & El Boustani E. Effects of feeding  
 1887 virgin olive oil or their polyphenols on lipid of rat liver. *Nutrition Research* 2002; 22:1067-1075.  
 1888  
 1889 Beck, A. T., Steer, R. A., y Brown, G. K. BDI-II. Beck Depression Inventory-Second Edition  
 1890 Manual. San Antonio, TX: The Psychological Corporation, 1996.  
 1891  
 1892 Bueno NB, de Melo IS, de Oliveira SL, da Rocha Ataíde T. Very-low-carbohydrate ketogenic  
 1893 diet v. low-fat diet for long-term weight loss: a meta-analysis of randomised controlled trials. *Br J*  
 1894 *Nutr* 2013;110:1178-87.  
 1895  
 1896 Buxton AE, Calkins H, Callans DJ, et al. ACC/AHA/HRS 2006 key data elements and definitions  
 1897 for electrophysiological studies and procedures: a report of the American College of  
 1898 Cardiology/American Heart Association Task Force on Clinical Data Standards (ACC/AHA/HRS  
 1899 Writing Committee to Develop Data Standards on Electrophysiology). *Circulation*.  
 1900 2006;114:2534-70.  
 1901  
 1902 Bliuc D, Nguyen ND, Milch VE, Nguyen TV, Eisman JA, Center JR. Mortality risk associated  
 1903 with low-trauma osteoporotic fracture and subsequent fracture in men and women. *JAMA*.  
 1904 2009;301:513-21.  
 1905  
 1906 Bray F, Znaor A, Cueva P, et al. Planning and Developing Population-Based Cancer  
 1907 Registration in Low- and Middle-Income Settings. IARC Technical Publication No. 43.  
 1908 International Agency for Research on Cancer. WHO, Geneva 2014.  
 1909  
 1910 Camargo A, Delgado-Lista J, Garcia-Rios A, et al. Expression of proinflammatory,  
 1911 proatherogenic genes is reduced by the Mediterranean diet in elderly people. *Br J Nutr*  
 1912 2012;108:500-8..  
 1913  
 1914 Camm AJ, Kirchhof P, Lip GY, Schotten U, Savelieva I, Ernst S, et al. ESC Committee for  
 1915 Practice Guidelines. Guidelines for the management of atrial fibrillation: the Task Force for the

- 1916 Management of Atrial Fibrillation of the European Society of Cardiology (ESC). European Heart  
 1917 Rhythm Association; European Association for Cardio-Thoracic Surgery, Europace.  
 1918 2010;10:1360-420.
- 1919
- 1920 Chrysohoou C, Panagiotakos DB, Pitsavos C, Das UN, Stefanadis C. Adherence to the  
 1921 Mediterranean diet attenuates inflammation and coagulation process in healthy adults: The  
 1922 ATTICA Study. J Am Coll Cardiol 2004;44:152-8.
- 1923
- 1924 Chrysohoou C, Skoumas J, Pitsavos C, et al. Long-term adherence to the Mediterranean diet  
 1925 reduces the prevalence of hyperuricaemia in elderly individuals, without known cardiovascular  
 1926 disease: the Ikaria study. Maturitas 2011;70:58-64.
- 1927
- 1928 Covas MI, Konstantinidou V, Fito M. Olive oil and cardiovascular health. J Cardiovasc  
 1929 Pharmacol 2009;54:477-482.
- 1930
- 1931 Covas MI, Nyyssonen K, Poulsen HE, et al. The effect of polyphenols in olive oil on heart  
 1932 disease risk factors: a randomized trial. Ann Intern Med 2006;145: 333-41.
- 1933
- 1934 Dai J, Jones DP, Goldberg J, et al. Association between adherence to the Mediterranean diet  
 1935 and oxidative stress. Am J Clin Nutr 2008;88:1364-70.
- 1936
- 1937 de Roos B, Zhang X, Rodriguez Gutierrez G, et al. Anti-platelet effects of olive oil extract: in  
 1938 vitro functional and proteomic studies. Eur J Nutr 2011;50: 553-62.
- 1939
- 1940 Defilippis AP, Blaha MJ, Jacobson TA. Omega-3 Fatty acids for cardiovascular disease  
 1941 prevention. Curr Treat Options Cardiovasc Med 2010;12:365-80.
- 1942
- 1943 Detopoulou P, Panagiotakos DB, Chrysohoou C, et al. Dietary antioxidant capacity and  
 1944 concentration of adiponectin in apparently healthy adults: the ATTICA study. Eur J Clin Nutr  
 1945 2010; 64:161-8.
- 1946
- 1947 DSM-IV-TR; APA, 2000. American Psychiatric Association. (2000). Diagnostic and statistical  
 1948 manual of mental disorders (4th ed., text rev.). Washington, DC.
- 1949
- 1950 Easton JD, Saver JL, Albers GW, et al. Definition and evaluation of transient ischemic attack: a  
 1951 scientific statement for healthcare professionals from the American Heart Association/American  
 1952 Stroke Association Stroke Council; Council on Cardiovascular Surgery and Anesthesia; Council  
 1953 on Cardiovascular Radiology and Intervention; Council on Cardiovascular Nursing; and the  
 1954 Interdisciplinary Council on Peripheral Vascular Disease. The American Academy of Neurology

- 1955 affirms the value of this statement as an educational tool for neurologists. *Stroke* 2009;40:2276-  
 1956 93.  
 1957  
 1958 Elosua R, Garcia M, Aguilar A, Molina L, Covas MI, Marrugat J. Validation of the Minnesota  
 1959 Leisure Time Physical Activity Questionnaire In Spanish Women. Investigators of the  
 1960 MARATDON Group. *Med Sci Sports Exerc* 2000;32:1431-7.  
 1961  
 1962 Elosua R, Marrugat J, Molina L, Pons S, Pujol E. Validation of the Minnesota Leisure Time  
 1963 Physical Activity Questionnaire in Spanish men. The MARATHOM Investigators. *Am J*  
 1964 *Epidemiol* 1994;139:1197- 209.  
 1965  
 1966 Esposito K, Marfella R, Ciotola M, et al. Effect of a Mediterranean-style diet on endothelial  
 1967 dysfunction and markers of vascular inflammation in the metabolic syndrome: a randomized  
 1968 trial. *JAMA* 2004;292:1440-6.  
 1969  
 1970 Esposito K, Kastorini CM, Panagiotakos DB, Giugliano D. Mediterranean diet and weight loss:  
 1971 metaanalysis of randomized controlled trials. *Metab Syndr Relat Disord* 2011;9:1-12.  
 1972  
 1973 Estruch R, Martínez-González MA, Corella D, et al. Effects of a Mediterranean-style diet on  
 1974 cardiovascular risk factors. A randomized trial. *Ann Intern Med* 2006;145:1-11.  
 1975  
 1976 Estruch R, Ros E, Salas-Salvado J, et al. Primary prevention of cardiovascular disease with  
 1977 Mediterranean diets: the PREDIMED trial. 2013;368:1279-90.  
 1978  
 1979 European Stroke Organisation (ESO) Executive Committee and ESO Writing Committee.  
 1980 Guidelines for management of ischaemic stroke and transient ischaemic attack 2008.  
 1981 *Cerebrovasc Dis* 2008;25:457-507.  
 1982  
 1983 Fernández JM, Rosado-Álvarez D, Da Silva Grigoletto ME, et al. Moderate-to-high-intensity  
 1984 training and a hypocaloric Mediterranean diet enhance endothelial progenitor cells and fitness in  
 1985 subjects with the metabolic syndrome. *Clin Sci (Lond)* 2012;123:361-73.  
 1986  
 1987 Fernández-Ballart JD, Piñol JL, Zazpe I, et al. Relative validity of a semi-quantitative food-  
 1988 frequency questionnaire in an elderly Mediterranean population of Spain. *Br J Nutr*  
 1989 2010;103:1808-16.  
 1990  
 1991 Fernández-Montero A, Bes-Rastrollo M, Beunza JJ, Barrio-Lopez MT, de la Fuente-Arillaga C,  
 1992 Moreno-Galarraga L, Martínez-González MA. Nut consumption and incidence of metabolic  
 1993 syndrome after 6-year follow-up: the SUN (Seguimiento Universidad de Navarra, University of  
 1994 Navarra Follow-up) cohort. *Public Health Nutr.* 2012 Oct 23:1-9.

- 1995
- 1996 Finucane MM, Stevens GA, Cowan MJ, et al. National, regional, and global trends in body-mass
- 1997 index since 1980: systematic analysis of health examination surveys and epidemiological
- 1998 studies with 960 country-years and 9.1 million participants. *Lancet* 2011;377:557-67.
- 1999
- 2000 First MB, Spitzer RL, Gibbon M, Williams J, Structured Clinical Interview for DSM-IV-TR Axis I
- 2001 Disorders, Research Version, Non-patient Edition (SCID-I/P). New York: Biometrics Research,
- 2002 New York State Psychiatric Institute. 2002.
- 2003
- 2004 Fuster V, et al. "ACC/AHA/ESC 2006 guidelines for the management of patients with atrial
- 2005 fibrillation executive summary: a report of the American College of Cardiology/American Heart
- 2006 Association Task Force on Practice Guidelines and the European Society of Cardiology
- 2007 Committee for Practice Guidelines(Writing Committee to Revise the 2001 Guidelines for the
- 2008 Management of Patients with Atrial Fibrillation)." *Eur Heart J* 2006; 27:1979-2030.
- 2009
- 2010 Fito M, Cladellas M, de la Torre R, et al. Anti-inflammatory effect of virgin olive oil in stable
- 2011 coronary disease patients: a randomized, crossover, controlled trial. *Eur J Clin Nutr*
- 2012 2008;62:570-4.
- 2013
- 2014 Fito M, Fitó M, Guxens M, et al. Effect of a traditional Mediterranean diet on lipoprotein
- 2015 oxidation: a randomized controlled trial. *Arch Intern Med* 2007;167:1195-1203.
- 2016
- 2017 Flegal KM, Kit BK, Orpana H, Graubard BI. Association of all-cause mortality with overweight
- 2018 and obesity using standard body mass index categories: a systematic review and meta-
- 2019 analysis. *JAMA* 2013;309:71-82.
- 2020
- 2021 Flint AJ, Hu FB, Glynn RJ, et al. Excess weight and the risk of incident coronary heart disease
- 2022 among men and women. *Obesity (Silver Spring)* 2010;18:377-83.
- 2023
- 2024 Folstein MF, Folstein SE, McHugh PR. Mini-mental state: A practical method for grading the
- 2025 cognitive state of patients for the clinician. *J Psychiatr Res* 1975;12:189-98.
- 2026
- 2027 Fuentes F, López-Miranda J, Pérez-Martínez P, et al. Chronic effects of a high-fat diet enriched
- 2028 with virgin olive oil and a low-fat diet enriched with alpha-linolenic acid on postprandial
- 2029 endothelial function in healthy men. *Br J Nutr* 2008;100:159-65.
- 2030
- 2031 Gea A, Bes-Rastrollo M, Toledo E, Garcia-Lopez M, Beunza JJ, Estruch R, Martinez-Gonzalez
- 2032 MA. Mediterranean alcohol-drinking pattern and mortality in the SUN (Seguimiento Universidad
- 2033 de Navarra) Project: a prospective cohort study. *Br J Nutr* 2014;111:1871-80.

- 2034  
2035 Gregg EW, Chen H, Wagenknecht LE, et al. Association of an intensive lifestyle intervention  
2036 with remission of type 2 diabetes. *JAMA* 2012;308:2489-96.  
2037  
2038 Guasch-Ferré M, Bulló M, Martínez-González MÁ, et al. Frequency of nut consumption and  
2039 mortality risk in the PREDIMED nutrition intervention trial. *BMC Med* 2013;11:164.  
2040  
2041 Gunstad J, Lhotsky A, Wendell CR, Ferrucci L, Zonderman AB. Longitudinal examination of  
2042 obesity and cognitive function: results from the Baltimore longitudinal study of aging.  
2043 *Neuroepidemiology* 2010;34:222-9.  
2044  
2045 Gutiérrez-Fisac JL, Guallar-Castillón P, León-Muñoz LM, et al. Prevalence of general and  
2046 abdominal obesity in the adult population of Spain, 2008-2010: the ENRICA study. *Obes Rev*  
2047 2012;13:388-92.  
2048  
2049 Haaf P, Drexler B, Reichlin T, , et al. High Sensitivity Cardiac Troponin in the Distinction of  
2050 Acute Myocardial Infarction from Acute Cardiac Non-Coronary Artery Disease, *Circulation*  
2051 2012;126:31-40.  
2052  
2053 Hall KD, Sacks G, Chandramohan D, Chow CC, Wang YC, Gortmaker SL, Swinburn BA.  
2054 Quantification of the effect of energy imbalance on bodyweight. *Lancet* 2011;378:826-37.  
2055  
2056 Henríquez Sánchez P, Ruano C, de Irala J, Ruiz-Canela M, Martínez-González MA, Sánchez-  
2057 Villegas A. Adherence to the Mediterranean diet and quality of life in the SUN Project. *Eur J Clin*  
2058 *Nutr.* 2012;66:360-8.  
2059  
2060 Hernán MA, Taubman SL. Does obesity shorten life? The importance of well-defined  
2061 interventions to answer causal questions. *Int J Obes (Lond)*. 2008;32 Suppl 3:S8-14.  
2062  
2063 Howard BV, Van Horn L, Hsia J, et al. Low-fat dietary pattern and risk of cardiovascular  
2064 disease: the Women's Health Initiative Randomized Controlled Dietary Modification Trial. *JAMA*.  
2065 2006;295:655-66.  
2066  
2067 Hu T, Mills KT, Yao L, et al. Effects of low-carbohydrate diets versus low-fat diets on metabolic  
2068 risk factors: a meta-analysis of randomized controlled clinical trials. *Am J Epidemiol* 2012;176  
2069 *Suppl 7*:S44-54.  
2070  
2071 Hamm CW, Bassand JP, et al. ESC Committee for Practice Guidelines. ESC Guidelines for the  
2072 management of acute coronary syndromes in patients presenting without persistent ST-  
2073 segment elevation The Task Force for the management of acute coronary syndromes (ACS) in



2074 patients presenting without persistent ST-segment elevation of the European Society of  
 2075 Cardiology (ESC). *Eur Heart J.* 2011;32:2999–3054.  
 2076  
 2077 Hughes AJ, Daniel SE, Kilford L, Lees AJ. Accuracy of clinical diagnosis of idiopathic  
 2078 Parkinson’s disease: a clinic-pathological study of 100 cases. *J Neurol Neurosurg Psych*  
 2079 1992;5:181-184.  
 2080  
 2081 Jiang R, Jacobs DR Jr, Mayer-Davis E, et al. Nut and seed consumption and inflammatory  
 2082 markers in the multi-ethnic study of atherosclerosis. *Am J Epidemiol* 2006;163:222-31.  
 2083  
 2084 Jones JL, Fernandez ML, McIntosh MS, et al. A Mediterranean-style low-glycemic-load diet  
 2085 improves variables of metabolic syndrome in women, and addition of a phytochemical-rich  
 2086 medical food enhances benefits on lipoprotein metabolism. *J Clin Lipidol* 2011;5:188-96.  
 2087  
 2088 Kastorini CM, Milionis HJ, Esposito K, Giugliano D, Goudevenos JA, Panagiotakos DB. The  
 2089 effect of Mediterranean diet on metabolic syndrome and its components: a meta-analysis of 50  
 2090 studies and 534,906 individuals. *J Am Coll Cardiol* 2011; 57:1299-313.  
 2091  
 2092 Khanna D, Fitzgerald JD, et al. 2012 American College of Rheumatology guidelines for  
 2093 management of gout. Part 1: systematic nonpharmacologic and pharmacologic therapeutic  
 2094 approaches to hyperuricemia. *Arthritis Care Res (Hoboken)*. 2012;64:1431-1446.  
 2095  
 2096 Larsen TM, Dalskov SM, van Baak M, et al. Diets with high or low protein content and glycemic  
 2097 index for weight-loss maintenance. *N Engl J Med* 2010;363:2102-13.  
 2098  
 2099 Li TY, Brennan AM, Wedick NM, Mantzoros C, Rifai N, Hu FB. Regular consumption of nuts is  
 2100 associated with a lower risk of cardiovascular disease in women with type 2 diabetes. *J Nutr*  
 2101 2009;139:1333-8.  
 2102  
 2103 Look AHEAD Research Group. Cardiovascular effects of intensive lifestyle intervention in type 2  
 2104 diabetes. *N Engl J Med* 2013;369:145-54.  
 2105  
 2106 López-Miranda J, Pérez-Jiménez F, Ros E, et al. Olive oil and health: Summary of the II  
 2107 International Conference on Olive Oil and Health consensus report, Jaén and Córdoba (Spain)  
 2108 2008. *Nutr Metab Cardiovasc Dis* 2010;20:284-94.  
 2109  
 2110 Lozano R, Naghavi M, Foreman K, et al. Global and regional mortality from 235 causes of death  
 2111 for 20 age groups in 1990 and 2010: a systematic analysis for the Global Burden of Disease  
 2112 Study 2010. *Lancet.* 2012;380:2095-128.  
 2113

2114 Ludwig DS. Weight loss strategies for adolescents: a 14-year-old struggling to lose weight.  
 2115 JAMA 2012;307:498-508.  
 2116

2117 Luppino FS, de Wit LM, Bouvy PF, et al. Overweight, obesity, and depression: a systematic  
 2118 review and meta-analysis of longitudinal studies. Arch Gen Psychiatry 2010;67:220-9.  
 2119

2120 Malik VS, Hu FB. Popular weight-loss diets: from evidence to practice. Nat Clin Pract  
 2121 Cardiovasc Med 2007;4:34-41.  
 2122

2123 Malik VS, Willett WC, Hu FB. Global obesity: trends, risk factors and policy implications. Nat  
 2124 Rev Endocrinol 2013;9:13-27.  
 2125

2126 Martínez-González MÁ, Bes-Rastrollo M. Nut consumption, weight gain and obesity:  
 2127 Epidemiological evidence. Nutr Metab Cardiovasc Dis 2011;21(Suppl 1): S40-45.  
 2128

2129 Martínez-Gonzalez MA, Bes-Rastrollo M. Dietary patterns, Mediterranean diet, and  
 2130 cardiovascular disease. Curr Opin Lipidol 2014;25:20-6.  
 2131

2132 Martínez-González MÁ, Corella D, Salas-Salvadó J, et al. Cohort profile: design and methods of  
 2133 the PREDIMED study. Int J Epidemiol 2012;41:377-85.  
 2134

2135 Martínez-González MÁ, Fernández-Jarne E, Serrano-Martínez M, Wright M, Gomez-Gracia E.  
 2136 Development of a short dietary intake questionnaire for the quantitative estimation of adherence  
 2137 to a cardioprotective Mediterranean diet. Eur J Clin Nutr 2004;58:1550-2.  
 2138

2139 Masters RK, Powers DA, Link BG. Obesity and US Mortality Risk Over the Adult Life Course.  
 2140 Am J Epidemiol 2013;177:431-42.  
 2141

2142 McKhann GM, Knopman DS, Chertkow H, et al. The diagnosis of dementia due to Alzheimer's  
 2143 disease: recommendations from the National Institute on Aging-Alzheimer's Association  
 2144 workgroups on diagnostic guidelines for Alzheimer's disease. Alzheimers Dement 2011;7:263-9.  
 2145

2146 McMurray JJ, Adamopoulos S, Anker SD, Auricchio A, Böhm M, Dickstein K, et Al; ESC  
 2147 Committee for Practice Guidelines. ESC Guidelines for the diagnosis and treatment of acute  
 2148 and chronic heart failure 2012. The Task Force for the Diagnosis and Treatment of Acute and  
 2149 Chronic Heart Failure 2012 of the European Society of Cardiology. Developed in collaboration  
 2150 with the Heart Failure Association (HFA) of the ESC. Eur Heart J. 2012;33:1787–1847.  
 2151

- 2152 McManus K, Antinoro L, Sacks F. A randomized controlled trial of a moderate-fat, low-energy  
 2153 diet compared with a low fat, low-energy diet for weight loss in overweight adults. *Int J Obes*  
 2154 *Relat Metab Disord*. 2001Oct;25(10):1503-11.  
 2155
- 2156 Mena MP, Sacanella E, Vazquez-Agell M, et al. Inhibition of circulating immune cell activation: a  
 2157 molecular antiinflammatory effect of the Mediterranean diet. *Am J Clin Nutr* 2009;89:248-56.  
 2158
- 2159 Meneses ME, Camargo A, Perez-Martinez P, et al. Postprandial inflammatory response in  
 2160 adipose tissue of patients with metabolic syndrome after the intake of different dietary models.  
 2161 *Mol Nutr Food Res* 2011;55:1759-70.  
 2162
- 2163 Moher D, Schulz KF, Altman DG. The CONSORT statement: revised recommendations for  
 2164 improving the quality of reports of parallel-group randomised trials. *Lancet* 2001;357:1191-4.  
 2165
- 2166 Moreno JA, López-Miranda J, Pérez-Martínez P, et al. A monounsaturated fatty acid-rich diet  
 2167 reduces macrophage uptake of plasma oxidised low-density lipoprotein in healthy young men.  
 2168 *Br J Nutr* 2008;100:569-75.  
 2169
- 2170 Mozaffarian D, Hao T, Rimm EB, Willett WC, Hu FB. Changes in diet and lifestyle and long-term  
 2171 weight gain in women and men. *N Engl J Med* 2011;364:2392-404.  
 2172
- 2173 National Institute of Diabetes and Digestive and Kidney Diseases. Body weight simulator. See:  
 2174 <http://bwsimulator.niddk.nih.gov/>, consulted 05/01/2012.  
 2175
- 2176 National Institute of Health. ClinicalTrials.gov. A service of the U.S. National Institutes of Health.  
 2177 See: <http://clinicaltrials.gov/ct2/home>, consulted 05/01/2012.  
 2178
- 2179 National Institute of Health. Clinical Guidelines on the Identification, Evaluation, and Treatment  
 2180 of Overweight and Obesity in Adults--The Evidence Report. National Institutes of Health. *Obes*  
 2181 *Res* 1998;2(6Suppl):51S-209S.  
 2182
- 2183 National Institute of Health, National Heart Lung and Blood Institute and North American  
 2184 Association for the Study of Obesity. The practical guide: Identification, evaluation, and  
 2185 treatment of overweight and obesity in adults. 2000.  
 2186
- 2187 Ni Mhurchu C, Rodgers A, Pan WH, Gu DF, Woodward M. Body mass index and cardiovascular  
 2188 disease in the Asia-Pacific Region: an overview of 33 cohorts involving 310 000 participants. *Int*  
 2189 *J Epidemiol* 2004;33:751-8.  
 2190

- 2191 Nigg CR, Burbank PM, Padula C, et al. Stages of change across ten health risk behaviors for  
2192 older adults. *Gerontologist* 1999;39: 473-82.  
2193
- 2194 Nordmann AJ, Nordmann A, Briel M, Keller U, Yancy WS Jr, Brehm BJ, Bucher HC. Effects of  
2195 low-carbohydrate vs low-fat diets on weight loss and cardiovascular risk factors: a meta-analysis  
2196 of randomized controlled trials. *Arch Intern Med* 2006;166:285-93.  
2197
- 2198 Norgren L, Hiatt WR, Dormandy JA, Nehler MR, Harris KA, Fowkes FG. Inter-Society  
2199 Consensus for the Management of Peripheral Arterial Disease (TASC II). *J Vasc Surg* 2007;45  
2200 Suppl S:S5-67.  
2201
- 2202 O'Brien PC, Fleming TR. A multiple testing procedure for clinical trials. *Biometrics* 1979;35:549-  
2203 56.  
2204
- 2205 Pedrero-Perez EJ, Ruiz-Sanchez de Leon JM, Lozoya-Delgado P, Llanero-Luque M, Rojo-Mota  
2206 G, Puerta-García C. Evaluación de los síntomas prefrontales: propiedades psicométricas y  
2207 datos normativos del cuestionario disejecutivo (DEX) en una muestra de población española.  
2208 *Rev Neurol* 2011; 52: 394-404.  
2209
- 2210 Peña-Casanova J, Quiñones-Ubeda S, Gramunt-Fombuena N, et al. Spanish Multicenter  
2211 Normative Studies (NEURONORMA Project): norms for verbal fluency tests. *Arch Clin*  
2212 *Neuropsychol.* 2009a;24:395-411.  
2213
- 2214 Peña-Casanova J, Quiñones-Ubeda S, Quintana-Aparicio M, et al. Spanish Multicenter  
2215 Normative Studies (NEURONORMA Project): norms for verbal span, visuospatial span, letter  
2216 and number sequencing, trail making test, and symbol digit modalities test. *Arch Clin*  
2217 *Neuropsychol.* 2009b;24:321-41.  
2218
- 2219 Pérez-Jiménez F, Lista JD, Pérez-Martínez P, et al. Olive oil and haemostasis: a review on its  
2220 healthy effects. *Public Health Nutr* 2006;9:1083-8.  
2221
- 2222 Ramier AM, Hécaen H. Role Respectif des atteintes frontales et de la latéralisation lésionelle  
2223 dans les déficits de la fluence verbale. *Rev Neurol (Paris)* 1970;123:17-22.  
2224
- 2225 Ramier AM, Hécaen H. Les déficits au test de "fluence verbale" chez les sujets gauchers avec  
2226 lésions hemispheriques unilaterales. *Rev Neurol (Paris)* 1977;133: 571-4.  
2227
- 2228 Razquin C, Martinez JA, Martinez-Gonzalez MA, Mitjavila MT, Estruch R, Marti A. A 3 years  
2229 follow-up of a Mediterranean diet rich in virgin olive oil is associated with high plasma  
2230 antioxidant capacity and reduced body weight gain. *Eur J Clin Nutr* 2009;63:1387-93.

- 2231  
2232 Razquin C, Martínez JA, Martínez-González MA, Salas-Salvadó J, Estruch R, Martí A. A 3-year  
2233 Mediterranean-style dietary intervention may modulate the association between adiponectin  
2234 gene variants and body weight change. *Eur J Nutr* 2010;49:311-9.  
2235  
2236 Reitan RM. *Trail Making Test: Manual for administration and scoring*. Tucson: Reitan  
2237 Neuropsychology Laboratory; 1992.  
2238  
2239 Rejeski WJ, Ip EH, Bertoni AG, et al. Lifestyle Change and Mobility in Obese Adults with Type 2  
2240 Diabetes. *N Engl J Med* 2012;366:1209-17.  
2241  
2242 Romaguera D, Norat T, Vergnaud AC, et al. Mediterranean dietary patterns and prospective  
2243 weight change in participants of the EPIC-PANACEA project. *Am J Clin Nutr* 2010;92:912-21.  
2244  
2245 Ros E. Nuts and novel biomarkers of cardiovascular disease. *Am J Clin Nutr* 2009; 89:1649S-  
2246 56S.  
2247  
2248 Ruano J, Lopez-Miranda J, Fuentes F, et al. Phenolic content of virgin olive oil improves  
2249 ischemic reactive hyperemia in hypercholesterolemic patients. *J Am Coll Cardiol*. 2005;  
2250 46:1864-8.  
2251  
2252 Ruiz-Canela M, Estruch R, Corella D, Salas-Salvadó J, Martínez-González MA. Association of  
2253 Mediterranean diet with peripheral artery disease: the PREDIMED randomized trial. *JAMA*.  
2254 2014;311:415-7.  
2255  
2256 Ryan DH, Espeland MA, Foster GD, et al. Look AHEAD (Action for Health in Diabetes): design  
2257 and methods for a clinical trial of weight loss for the prevention of cardiovascular disease in type  
2258 2 diabetes. *Control Clin Trials* 2003;24:610-28.  
2259  
2260 Sabaté J, Oda K, Ros E. Nut consumption and blood lipid levels: a pooled analysis of 25  
2261 intervention trials. *Arch Intern Med* 2010;170:821-7.  
2262  
2263 Sacco RL, Kasner SE, Broderick JP, et al. An Updated Definition of Stroke for the 21st  
2264 Century: A Statement for Healthcare Professionals from the American Heart  
2265 Association/American Stroke Association. *Stroke*.2013;44:2064-2089.  
2266  
2267 Sacks FM, Bray GA, Carey VJ, et al. Comparison of weight-loss diets with different  
2268 compositions of fat, protein, and carbohydrates. *N Engl J Med* 2009;360:859-73  
2269

- 2270 Salas-Salvadó J, Fernández-Ballart J, Ros E, et al. Effect of a Mediterranean diet supplemented  
 2271 with nuts on metabolic syndrome status: one-year results of the PREDIMED randomized trial.  
 2272 Arch Intern Med 2008;168:2449-58.  
 2273
- 2274 Salas-Salvadó J, Bulló M, Babio N, et al. Reduction in the incidence of type 2 diabetes with the  
 2275 Mediterranean diet: results of the PREDIMED-Reus nutrition intervention randomized trial.  
 2276 Diabetes Care 2011;34:14-9.  
 2277
- 2278 Salas-Salvadó J, Bulló M, Estruch R, et al. Prevention of diabetes with Mediterranean diets: a  
 2279 subgroup analysis of a randomized trial. Ann Intern Med 2014;160:1-10.  
 2280
- 2281 Sanchez-Villegas A, Ara I, Dierssen T, de la Fuente C, Ruano C, Martínez-González MA.  
 2282 Physical activity during leisure time and quality of life in a Spanish cohort: SUN (Seguimiento  
 2283 Universidad de Navarra) project. Br J Sports Med. 2012;46:443-8.  
 2284
- 2285 Sanz, Navarro y Vázquez, Adaptación española para el Inventario de Depresión de Beck-II  
 2286 (BDI-II). 1. Propiedades psicométricas en estudiantes universitarios. Análisis y modificación de  
 2287 conducta 2003;29: 239-288.  
 2288
- 2289 Schröder H, Fitó M, Estruch R, et al. A short screener is valid for assessing Mediterranean diet  
 2290 adherence among older Spanish men and women. J Nutr 2011;141:1140-5.  
 2291
- 2292 Schulz KF, Grimes DA. Multiplicity in randomised trials II: subgroup and interim analyses.  
 2293 Lancet 2005;365:1657-61.  
 2294
- 2295 Schulze MB, Fung TT, Manson JE, Willett WC, Hu FB. Dietary patterns and changes in body  
 2296 weight in women. Obesity (Silver Spring) 2006;14:1444-53.  
 2297
- 2298 Shai I, Schwarzfuchs D, Henkin Y, et al. Weight loss with a low-carbohydrate, Mediterranean, or  
 2299 low-fat diet. N Engl J Med 2008;359:229-41.  
 2300
- 2301 Smith, A. Symbol Digit Modalities Test. Manual. Los Angeles: Western Psychological Services;  
 2302 1973.  
 2303
- 2304 Sofi F, Abbate R, Gensini GF, Casini A. Accruing evidence on benefits of adherence to the  
 2305 Mediterranean diet on health: an updated systematic review and meta-analysis. Am J Clin Nutr  
 2306 2010;92:1189-96.  
 2307
- 2308 Song YM, Sung J, Davey Smith G, Ebrahim S. Body mass index and ischemic and hemorrhagic  
 2309 stroke: a prospective study in Korean men. Stroke 2004;35:831-6.

- 2310  
2311 Tendra M, Aboyans V, Bartelink ML, et al. ESC Guidelines on the diagnosis and treatment of  
2312 peripheral artery diseases. *Eur Heart J*. 2011;32: 2851–2906.  
2313  
2314 Tobias DK, Hu FB. Does being overweight really reduce mortality? *Obesity* (Silver Spring).  
2315 2013;21:1746-9.  
2316  
2317 Thygesen K, Alpert JS, Jaffe L, et al. Third universal definition of myocardial infarction. *Eur*  
2318 *Heart J* 2012;33:2551–2567.  
2319  
2320 Urpi-Sarda M, Casas R, Chiva-Blanch G, et al. Virgin olive oil and nuts as key foods of the  
2321 Mediterranean diet effects on inflammatory biomarkers related to atherosclerosis. *Pharmacol*  
2322 *Res* 2012; 65:577-83.  
2323  
2324 Wallston KA, Stein MJ, Smith CA. Form C of the MHLC scales: a condition-specific measure of  
2325 locus of control. *J Pers Assess*. 1994 Dec;63(3):534-53.  
2326  
2327 Wallston, Wallston, & DeVellis, 1978, *Health Education Monographs*, 6, 160-170.  
2328  
2329 Ware JE, Gandek B, Gandek B Jr. Overview of the SF-36 Health Survey and the International  
2330 Quality of Life Assessment (IQOLA) Project. *J Clin Epidemiol* 1998;51:903-12.  
2331  
2332 Wechsler, D. Wechsler Adult Intelligence Scale-III. San Antonio, Texas: Psychological  
2333 Corporation; 1997a.  
2334  
2335 Wechsler, D. Wechsler Memory Scale. San Antonio, Texas: Psychological Corporation; 1997b.  
2336 Wechsler, D. WAIS III. Escala de inteligencia de Wechsler para adultos-III. Manual técnico.  
2337 Madrid: TEA Ediciones; 1999.  
2338  
2339 Wechsler D. Escala de memoria Wechsler.-III. Manual técnico: TEA Ediciones. S. A; 2004.  
2340  
2341 Willett WC. Dietary fat plays a major role in obesity: no. *Obes* 2002;Rev 3:59-68.  
2342  
2343 Willett WC. *Eat, drink, and be healthy: the Harvard Medical School guide to healthy eating*. New  
2344 York: Free Press, 2001  
2345  
2346 Wilson BA, Alderman N, Burgess PW, Emslie H, Evans JJ. *Behavioural assessment of the*  
2347 *dysexecutive syndrome*. Bury St. Edmunds, UK: Thames Valley Test; 1996.  
2348

- 2349 Wing RR. Long-term effects of a lifestyle intervention on weight and cardiovascular risk factors  
2350 in individuals with type 2 diabetes mellitus: four-year results of the Look AHEAD trial. Arch  
2351 Intern Med 2010;170:1566-75.  
2352  
2353 World Health Organization. Obesity: Preventing and managing the global epidemic. Geneva:  
2354 World Health Organization, 1998. World Health Organization. International Classification of  
2355 Diseases for Oncology, 3rd Edition (ICD-O-3).  
2356 <http://www.who.int/classifications/icd/adaptations/oncology/en/index.html>, consulted 24/04/2012.  
2357  
2358 Yesavage JA. Geriatric Depression Scale. Psychopharmacol Bull 1988;24:709-11.  
2359  
2360 Yancy CW, Jessup M, Bozkurt B, et al. 2013 ACCF/AHA guideline for the management of heart  
2361 failure: a report of the American College of Cardiology Foundation/American Heart Association  
2362 Task Force on Practice Guidelines. J Am Coll Cardiol. 2013; 62: e147- e239.  
2363  
2364 Zazpe I, Sanchez-Tainta A, Estruch R, et al. A large randomized individual and group  
2365 intervention conducted by registered dietitians increased adherence to Mediterranean-type  
2366 diets: the PREDIMED study. J Am Diet Assoc 2008;108:1134-44  
2367  
2368 Zhu L, Liu Z, Feng Z, et al. Hydroxytyrosol protects against oxidative damage by simultaneous  
2369 activation of mitochondrial biogenesis and phase II detoxifying enzyme systems in retinal  
2370 pigment epithelial cells. J Nutr Biochem 2010;21:1089-98.



2371 **ANNEX 1. SUB-STUDIES**

2372

2373 Body composition

2374 DEXA or computed tomography will be used to measure body composition at recruiting  
2375 centers wherein the necessary equipment and technology are available. Body  
2376 composition will be analyzed by General Electric Lunar DEXA scanner at the Rovira i  
2377 Virgili University, Universitat de les Illes Balears, Hospital Clinico de Barcelona, and the  
2378 Departments of Preventive Medicine and Nutrition in Navarra.

2379

2380 Other sub-studies

2381 Depending on available funds, sub-studies will be conducted to evaluate gene  
2382 environment interactions, epigenetic factors such as DNA methylation, histone  
2383 modification and microRNA alterations, the composition and function of intestinal  
2384 microbiota by pyrosequencing, and the effect of the intervention on metabolomics,  
2385 transcriptomics and proteomics.

2386

2387

2388

2389  
2390  
2391  
2392

## ANNEX 2. PARTICIPATING CENTERS

### Recruitment centers

| ID | PI                                     | Email address                                         | Center                                                         |
|----|----------------------------------------|-------------------------------------------------------|----------------------------------------------------------------|
| 01 | Enrique Gómez-Gracia                   | egomezgracia@gmail.com                                | Universidad de Málaga, Málaga                                  |
| 02 | José Lapetra                           | jlapetra@ono.com                                      | Distrito Sanitario de Atención Primaria de Sevilla, Sevilla    |
| 03 | J. Alfredo Martínez                    | jalfmtz@unav.es                                       | Universidad de Navarra - Nutrition, Pamplona                   |
| 04 | María Adoración Romaguera; Miquel Fiol | mariaadoracion.romaguera@ssib.es; miquelfiol@yahoo.es | Hospital Son Espases, Palma                                    |
| 05 | Ramon Estruch                          | restruch@clinic.ub.es                                 | Hospital Clínic-Medicina Interna, Barcelona                    |
| 06 | Montserrat Fitó                        | mfito@imim.es                                         | Institut Hospital del Mar d'Investigacions Mèdiques, Barcelona |
| 07 | Jordi Salas-Salvadó                    | jordi.salas@urv.cat                                   | Universitat Rovira i Virgili, Reus                             |
| 08 | Aurora Bueno                           | abueno@ugr.es                                         | Universidad de Granada, Granada                                |
| 09 | Clotilde Vázquez                       | cvazquezma@gmail.com                                  | Hospital Ramón y Cajal, Madrid                                 |
| 10 | Miguel Ángel Martínez-González         | mamartinez@unav.es                                    | Universidad de Navarra - Epidemiology, Pamplona                |
| 11 | Fernando Aròs                          | aborau@htxa.osakidetza.net                            | Hospital Universitario Araba, Vitoria                          |
| 12 | Dolores Corella                        | dolores.corella@uv.es                                 | Universidad de Valencia, Valencia                              |
| 13 | Lluis Serra-Majem                      | lserra@dcc.ulpgc.es                                   | Universidad de las Palmas de Gran Canaria, Las Palmas          |
| 14 | Xavier Pintó                           | xpinto@csub.scs.es                                    | Hospital de Bellvitge, L'Hospitalet de Llobregat, Barcelona    |
| 15 | José López Miranda                     | jlopezmir@gmail.com                                   | Universidad de Córdoba, Córdoba                                |
| 16 | José Maria Ordovás                     | Jose.Ordovas@tufts.edu                                | IMDEA, Madrid                                                  |
| 17 | Pilar Matía Martín                     | pilar.matia@gmail.com                                 | Hospital Clínic, Madrid                                        |
| 18 | Francisco Tinahones                    | fjtinahones@hotmail.com                               | Hospital de Málaga, Málaga                                     |
| 19 | Josep Tur                              | pep.tur@uib.es                                        | Universitat de les Illes Balears, Palma                        |
| 20 | Josep Vidal                            | JOVIDAL@clinic.ub.es                                  | Hospital Clínic – Endocrinología, Barcelona                    |

2393  
2394

2395 **Support centers**

2396

| ID | PI                        | Email address                        | Center                             |
|----|---------------------------|--------------------------------------|------------------------------------|
| A1 | Emilio Ros                | eros@clinic.ub.es                    | Hospital Clínic, Barcelona         |
| A2 | Rosa M. Lamuela-Raventós  | lamuela@ub.edu                       | Universitat de Barcelona           |
| A3 | Guillermo Sáez            | guillermo.Saez@uv.es                 | Universitat de Valencia            |
| A4 | María del Puy Portillo    | mariapuy.portillo@ehu.es             | Universidad del País Vasco         |
| A5 | Ascensión Marcos          | amarcos@ictan.csic.es                | CSIC, Madrid                       |
| A6 | Cristina Botella          | botella@uji.es                       | Universitat Jaume I de Castellón   |
| A7 | Fernando Fernández-Aranda | ffernandez@bellvitgehospita<br>l.cat | Hospital Universitari de Bellvitge |

2397

2398

2399
