# Supplementary material
Source: PubMed Central journal article supplement (PMC6802271)
Supplement: jama-322-1486-s002.pdf [file jama-322-1486-s002.pdf]

## Supplementary Online Content

Sayón-Orea C, Razquin C, Bulló M, et al. Effect of a nutritional and behavioral intervention on energy-reduced Mediterranean diet adherence among patients with metabolic syndrome [published October 15, 2019]. *JAMA*. doi:10.1001/jama.2019.14630

### **Supplement 2.** Statistical analysis plan

This supplementary material has been provided by the authors to give readers additional information about their work.

1 **SECTION 1: ADMINISTRATIVE INFORMATION**

---

2

3 **Title and trial registration**

---

4

5 **Effect of an energy-reduced Mediterranean diet, physical activity and behavioral**  
6 **intervention on the primary prevention of cardiovascular disease – Statistical analysis plan**

7

8 Trial registered at the International Standard Randomized Controlled Trial (ISRCT;  
9 <http://www.isrctn.com/ISRCTN89898870>) with number 89898870 and a registration date of 24  
10 July 2014.

11 **SAP version: 2**

---

12

13 SAP version 1- date November 2018

14 SAP version 2- date: July 2019

15 **Protocol version**

---

16 April 3<sup>rd</sup>, 2018

17

18 Available at: [https://www.predimedplus.com/wp-content/uploads/2016/07/Protocolo-](https://www.predimedplus.com/wp-content/uploads/2016/07/Protocolo-PREDIMED_PLUS_eng_Jan2014_12-03-2018-y-April_2018_03-04-2018.pdf)  
19 [PREDIMED\\_PLUS\\_eng\\_Jan2014\\_12-03-2018-y-April\\_2018\\_03-04-2018.pdf](https://www.predimedplus.com/wp-content/uploads/2016/07/Protocolo-PREDIMED_PLUS_eng_Jan2014_12-03-2018-y-April_2018_03-04-2018.pdf)

20

21 Accessed: July 2<sup>nd</sup>, 2019

22

23 **SAP revisions**

---

24

25 July 2019

26

27

28

---

29 Roles and responsibility

---

30 SAP contributors:

31 1. Person writing the SAP

32 Estefanía Toledo, MD, MHP, PhD and Alfredo Gea, DPharm, PhD

33 Department of Preventive Medicine and Public Health, University of Navarra

34 CIBER Fisiopatología de la Obesidad y Nutrición

35

36 2. Senior statistician responsible

37 Miguel A. Martínez-González, MD, PhD, MPH, Professor of Epidemiology

38 Jesus López-Fidalgo, PhD, Professor of Statistics

39

40 3. Chief investigator/clinical lead: Jordi Salas-Salvadó, Miguel A. Martínez-González

41

42 Signatures

---

43

44 \_\_\_\_\_

45 Estefanía Toledo

46

47 \_\_\_\_\_

48 Alfredo Gea

49

50 \_\_\_\_\_

51 Miguel A Martínez-González

52

53 \_\_\_\_\_

54 Jesús López Fidalgo

55

56 \_\_\_\_\_

57 Jordi Salas-Salvadó

## 58 SECTION 2: INTRODUCTION

---

### 59 Background and rationale

---

60 The completed PREDIMED (in Spanish: PREvención con Dieta MEDiterránea) cardiovascular  
61 primary prevention trial (Martinez-González et al, 2012) successfully demonstrated that long-  
62 term adherence to an unrestricted-energy Mediterranean diet (MedDiet) supplemented with  
63 extra-virgin olive oil (EVOO) or mixed nuts reduced the incidence of major clinical events of  
64 cardiovascular disease (CVD) in older individuals at high risk. Final results were republished in  
65 2018 showing an approximately 30% relative reduction in the risk for the composite primary  
66 end-point of stroke, myocardial infarction and cardiovascular death (Estruch et al, 2018).  
67 However, the PREDIMED trial only tested changes in the composition of the overall diet, not in  
68 other lifestyle aspects such as total energy intake (as it was *ad libitum*), physical activity, or  
69 weight loss.

70 The rationale for the new PREDIMED-Plus randomized controlled trial (RCT) is to go  
71 beyond the intervention delivered in PREDIMED and to answer one of the most important  
72 questions for clinical practice in the context of the current unprecedented obesity pandemic  
73 (The GBD 2015 Obesity Collaborators, 2017; González-Muniesa et al, 2017): is intentional  
74 weight loss (using diet and physical activity) able to bring about a substantial reduction in  
75 clinical CVD events in the long-term? Our main hypothesis is that by addressing 3 new lifestyle  
76 factors (energy reduction with a high-quality dietary pattern, increased physical activity (PA)  
77 and weight loss) an even stronger reduction in the risk of hard CVD end-points will be attained  
78 (Martinez-González et al, 2018).

79 PREDIMED-Plus is expected to obtain synergy from the beneficial effects of a high-quality  
80 diet (a MedDiet) plus an intensive weight-loss intervention (using energy reduction and  
81 physical activity) on CVD incidence. This strategy should have positive effects on weight loss  
82 (focused on loss of fat mass) and long-term weight-loss maintenance, as shown in a 2-year  
83 randomized trial comparing an energy-reduced MedDiet versus low-fat versus low-  
84 carbohydrate diets (Shai et al, 2008; Schwarzfuchs et al, 2012).

85

### 86 Objectives

---

87 Our long-term objective is to provide effective treatment for reducing excessive CVD  
88 morbidity and mortality in overweight and obese adults, irrespective of whether the  
89 participants are diabetic at the beginning of the study. To achieve this goal, we will compare  
90 the effects on CVD rates of an intensive lifestyle and weight loss intervention program based  
91 on the traditional Mediterranean diet and including increased physical activity, energy  
92 reduction and behavioral support (intervention group) with those of a non-intensive  
93 intervention program that provides both education on the traditional Mediterranean diet for  
94 the prevention of CVD in accordance with the principles outlined in the PREDIMED trial and  
95 usual care by primary healthcare professionals (control group). The importance of attending  
96 visits to healthcare professionals will be stressed and general recommendations on  
97 management of the metabolic syndrome will be provided to the control group.

98

99

100 **Main specific objectives**

101 To evaluate the effect of an intensive weight-loss-oriented lifestyle intervention program  
102 based on a traditional Mediterranean diet with energy reduction, increased physical activity  
103 and behavioral therapy on 2 primary end-points:

104 1. The incidence of CVD (a composite of non-fatal myocardial infarction, non-fatal stroke  
105 and cardiovascular death)

106 2. Weight loss and long-term maintenance of weight-loss

107 Importantly, the 3 different components of the primary CVD end-point, namely stroke,  
108 myocardial infarction and cardiovascular death, will not be analyzed separately.

109

110 **Specific secondary objectives**

111 This intensive intervention program is likely to result in reductions of:

- 112 - waist circumference
- 113 - acute coronary syndromes
- 114 - coronary revascularization
- 115 - transient ischemic attack
- 116 - total mortality
- 117 - heart failure
- 118 - peripheral artery disease
- 119 - venous thrombosis
- 120 - atrial fibrillation
- 121 - type-2 diabetes
- 122 - complications of type-2 diabetes (diabetic nephropathy, diabetic retinopathy and  
123 diabetic polyneuropathy)
- 124 - total cancer
- 125 - cancer in main sites (breast, prostate, colorectal, lung and stomach)
- 126 - gallstone disease
- 127 - symptomatic gout
- 128 - neurodegenerative disorders (dementia and Parkinson's disease)
- 129 - unipolar depression
- 130 - osteoporotic fractures
- 131 - cataract surgery
- 132 - surgery for obesity
- 133 - eating behavior disorders

134 We will also address the effect of the intervention on the following intermediate outcomes:  
135 nutrient intake and adherence to an overall healthy dietary pattern, systolic and diastolic  
136 blood pressure, serum lipid concentrations, fasting glucose, glycated hemoglobin and uric acid,  
137 kidney function, liver function, C-reactive protein, anti-hypertensive, anti-diabetic and lipid-  
138 lowering medication needs, ECG traits, cognitive function, quality of life, and  
139 psychopathological scales.

140 We will also store plasma, serum, peripheral cells and urine samples to evaluate other  
141 hypotheses in the future, depending on availability of additional funding.

142 SECTION 3: STUDY METHODS

---

143 Trial design

---

144 The PREDIMED-Plus trial is a 6-year parallel-group, multicenter RCT involving 6,874  
145 participants recruited in 23 Spanish recruiting centers. The main aim is to assess the effect of  
146 an intensive weight-loss intervention based on an energy-reduced Mediterranean diet  
147 (erMedDiet), PA promotion, and behavioral support on CVD events in comparison with a  
148 control group receiving usual care, including the recommendation to follow an unrestricted-  
149 energy MedDiet without advice to increase PA. The primary end point is a combination of CVD  
150 events (non-fatal myocardial infarction, non-fatal stroke and cardiovascular death).

151 A detailed description of the intervention can be found in the trial protocol  
152 (<https://bit.ly/2OZsv3n>).

153

154 Randomization

---

155 For the baseline visit, each recruiting center randomly assigned eligible candidates to one  
156 of two groups, intensive intervention group or usual care (control) group, using a centrally-  
157 controlled, computer-generated random-number system (available at:  
158 [www.predimedplus.com](http://www.predimedplus.com)). The University of Navarra, Department of Preventive Medicine and  
159 Public Health was responsible for the randomization procedure by which participants were  
160 randomly assigned with stratification by center, sex, and age group (<65, 65-70, >70 years) in  
161 blocks of 6. However, during the randomization stage, centers and staff were blinded to this  
162 block size in order to ensure absolutely blinded randomization. Members of the same  
163 household were randomized together. The recruiting centers entered the participants'  
164 identification criteria into the internet-based system in a blind manner, without any possible  
165 foretelling of the group that the participant will be allocated. Therefore, a completely blinded  
166 randomization procedure was used. The system automatically assigned each participant or  
167 members of the same household to their allocated groups according to a random and  
168 unpredictable algorithm, out of the control of any staff involved in the trial.

169 Once this occurred, the assigned group could not be changed. In the specific cases of other  
170 members of the same household who were recruited at a different time than the first  
171 recruited member of the same household, the last member of the same household entering  
172 the study was assigned (not randomized) to the same study arm as the first member of that  
173 household in order to ensure high compliance with the intervention, peer support, and also to  
174 avoid contamination and potential conflicts between members of the same household.

175

176 Sample size

---

177 We will determine the effect of the intensive weight-loss lifestyle intervention with an  
178 energy-reduced Mediterranean diet on the two primary outcomes below, assuming a two-  
179 tailed alpha error of 0.05.

180 1. Effect of the intervention on incident CVD (exclusively, a composite non-fatal myocardial  
181 infarction, non-fatal stroke, and cardiovascular death). The cumulative projected incidence  
182 after including as primary events the cardiovascular composite of stroke, cardiovascular deaths

183 and all non-fatal acute myocardial infarctions with positive high-sensitivity troponin tests after  
 184 6 years will be at least 10% in the control group, based on the observed results in the  
 185 PREDIMED trial after 4.8 years (which did not include high-sensitivity troponin tests). The  
 186 hazard ratio (HR) for the combined primary endpoint is anticipated to be 0.70<sup>2</sup> and will  
 187 probably be even lower (greater protective effect) after considering that in the PREDIMED trial  
 188 no energy reduction was implemented, physical activity was not encouraged, and weight loss  
 189 was not a target of the intervention. Under these assumptions, therefore, even if the dropout  
 190 rates were to reach 20%, the required sample size would be 2,400 per group (see Figure 1). To  
 191 be conservative, however, we planned to recruit 6,000 participants and assign 3,000  
 192 participants to each group. The participants were recruited at 23 recruiting centers, each of  
 193 which had the goal of recruiting, educating and following approximately 300 participants, 150  
 194 in the control group and 150 in the intensive intervention group.

195

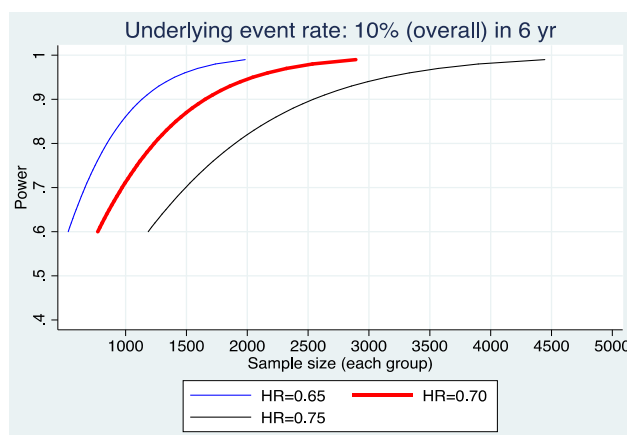

196

197 Figure 1. Estimation of the sample size required per intervention group in the PREDIMED-  
 198 PLUS trial

199

200 2. Effect of the intervention on weight change. Based on previous studies, we can expect a  
 201 minimum weight change for participants in the control group and a weight loss of 3-4.5 kg for  
 202 those in the intensive lifestyle intervention group, with a standard deviation of 8 kg (Shai et al,  
 203 2008; Sacks et al, 2009; Look AHEAD Research Group, 2010). Assuming that our intervention  
 204 will have only a small effect on weight change and calculating the sample size according to a  
 205 weight change of 1 kg in the usual care group, a weight change of 3 kg in the intensive lifestyle  
 206 intervention group (net difference = 2 kg), and a standard deviation of 8 kg, in order to achieve  
 207 a statistical power of 0.80 we would need a sample size of only 337 in each group. Since the  
 208 number of participants to be recruited is much higher than this figure, the statistical power  
 209 needed to reach this objective is largely guaranteed.

210

211 Framework

212 Framework: superiority hypothesis testing.

213 Assessment of primary, secondary and intermediate outcomes will be based on this  
 214 framework.

215

216 Statistical interim analyses and stopping guidance

---

217 Data from the PREDIMED-PLUS trial will be analyzed after 3 years of median follow-up,  
218 after 5 years of median follow-up, and at the end of the trial. For methodological reasons but  
219 especially for ethical motives, suitable follow-up for a trial must include at least one interim  
220 analysis (Schulz and Grimes, 2005). However, to preserve an overall alpha error of 0.05,  
221 interim analyses have to be penalized. We will use the O'Brien and Fleming boundaries  
222 (O'Brien and Fleming, 1979). With this method, the boundaries are stricter at the earlier stages  
223 of the study than at the later ones. Applying this rule leads to the following p values for  
224 stopping the trial (Schulz and Grimes, 2005):

- 225 • First interim analysis (median follow-up: 3 years); threshold p value: 0.0005.
- 226 • Second interim analysis (median follow-up: 5 years); p value: 0.014.
- 227 • Final analysis (median follow-up: 8 years); p value: 0.045

228

229 Timing of final analysis

---

230 Active intervention will be implemented during the first 6 years of trial duration (this 6-  
231 year period does not correspond to the median follow-up time, because all participants will  
232 homogeneously complete 6 years of intervention) and they will be followed-up for two further  
233 years to assess incident outcomes (Table 1). Thus, the total duration of the trial will be 8 years  
234 for each participant.

235 Information will be collected for 8 years after the baseline visit date for each participant.

236 Overall, hard clinical end-points will be assessed only after completion of the 8-year  
237 follow-up period. The only exceptions will be:

- 238 a) Type 2 diabetes—follow-up 7 years: according to the Diabetes Prevention Impact  
239 Toolkit (<https://nccd.cdc.gov/Toolkit/DiabetesImpact/>), the expected number of  
240 incident type 2 diabetes cases among participants initially free of diabetes during the  
241 first 7 years is high (620), so that we expect to have sufficient statistical power after 7  
242 years of follow-up.
- 243 b) Parkinson's disease—follow-up 10 years: the incidence of Parkinson's disease is lower  
244 than for other reported outcomes so that participants will be followed for 10 years to  
245 ensure a high-enough statistical power
- 246 c) Cancer: we will consider not only overall cancer but also specific cancers as outcomes.  
247 In order to have a sufficient number of cases after breaking down by cancer location  
248 and to allow for a long-enough induction time, participants will be followed-up for 10  
249 years.

250

251



**Table 1.** Timeline for reported outcomes

| Outcomes                                                                                                                       | Follow-up |     |     |     |     |     |      |
|--------------------------------------------------------------------------------------------------------------------------------|-----------|-----|-----|-----|-----|-----|------|
|                                                                                                                                | M-6       | Y-1 | Y-6 | Y-7 | Y-8 | Y-9 | Y-10 |
| <b>Primary</b>                                                                                                                 |           |     |     |     |     |     |      |
| 1. Composite endpoint of cardiovascular death, non-fatal myocardial infarction or stroke                                       |           |     |     |     | X   |     |      |
| 2. Body weight change                                                                                                          | X         | X   | X   |     |     |     |      |
| <b>Secondary</b>                                                                                                               |           |     |     |     |     |     |      |
| 3. Death from any cause                                                                                                        |           |     |     |     | X   |     |      |
| 4. Waist circumference change                                                                                                  | X         | X   | X   |     |     |     |      |
| 5. Incidence of acute coronary syndrome (unstable angina)                                                                      |           |     |     |     | X   |     |      |
| 6. Incidence of coronary revascularization (percutaneous or surgical)                                                          |           |     |     |     | X   |     |      |
| 7. Incidence of atrial fibrillation                                                                                            |           |     |     |     | X   |     |      |
| 8. Incidence of peripheral artery disease                                                                                      |           |     |     |     | X   |     |      |
| 9. Incidence of heart failure                                                                                                  |           |     |     |     | X   |     |      |
| 10. Incidence of type-2 diabetes                                                                                               |           |     |     | X   |     |     |      |
| 11. Incidence of type-2 diabetes complications (diabetic nephropathy, diabetic retinopathy and diabetic polyneuropathy)        |           |     |     |     | X   |     |      |
| 12. Incidence of dementia/Alzheimer's disease                                                                                  |           |     |     |     | X   |     |      |
| 14. Incidence of other dementias, diagnosed when there are cognitive or behavioral (neuropsychiatric) symptoms (see protocols) |           |     |     |     | X   |     |      |
| 15. Incidence of Parkinson's disease                                                                                           |           |     |     |     |     |     | X    |
| 16. Incidence of major unipolar depression                                                                                     |           |     |     |     | X   |     |      |
| 17. Incidence of osteoporotic fractures                                                                                        |           |     |     |     | X   |     |      |
| 18. Incidence of gallstone disease or cholecystectomy                                                                          |           |     |     |     | X   |     |      |
| 19. Incidence of symptomatic gout                                                                                              |           |     |     |     | X   |     |      |
| 20. Incidence of transient ischemic attack                                                                                     |           |     |     |     | X   |     |      |
| 21. Incidence of cataract surgery                                                                                              |           |     |     |     | X   |     |      |
| 22. Incidence of venous thromboembolism                                                                                        |           |     |     |     | X   |     |      |
| 23. Incidence of total cancer and specific cancers in main cancer sites (breast, prostate, lung, colorectal, or stomach)       |           |     |     |     |     |     | X    |

| <b>Secondary (continued):</b>                                                                                                                                                                                                                                                           | <b>M-6</b> | <b>Y-1</b> | <b>Y-6</b>     | <b>Y-7</b> | <b>Y-8</b> | <b>Y-9</b> | <b>Y-10</b> |
|-----------------------------------------------------------------------------------------------------------------------------------------------------------------------------------------------------------------------------------------------------------------------------------------|------------|------------|----------------|------------|------------|------------|-------------|
| 24. Eating behavior disorders                                                                                                                                                                                                                                                           |            |            |                |            | X          |            |             |
| 25. Surgery for obesity                                                                                                                                                                                                                                                                 |            |            |                |            | X          |            |             |
| <b>Other intermediate outcomes are changes in:</b>                                                                                                                                                                                                                                      |            |            |                |            |            |            |             |
| 27. Overall diet (17-item score of adherence to the energy-reduced Mediterranean diet and 14-item score of Mediterranean diet) and nutrient intake                                                                                                                                      | X          | X          | X              |            |            |            |             |
| 28. Blood pressure (Systolic <sup>1</sup> and Diastolic blood pressure)                                                                                                                                                                                                                 | X          | X          | X              |            |            |            |             |
| 28. Fasting blood glucose and hemoglobin A1C levels                                                                                                                                                                                                                                     | X          | X          |                |            | X          |            |             |
| 29. Serum lipid concentrations (triglycerides <sup>2</sup> , cholesterol, and HDL <sup>3</sup> and LDL <sup>4</sup> cholesterol)                                                                                                                                                        | X          | X          |                |            | X          |            |             |
| 30. Renal function (changes in estimated glomerular filtration rate (eGFR) and urine microalbumin-to-creatinine ratio (UACR), incidence and reversion of chronic kidney disease (CKD, eGFR<60 ml/min/1.73m <sup>2</sup> ) and microalbuminuria (UACR≥30 mg/g))                          |            | X          | X <sup>#</sup> |            | X          |            |             |
| 31. Uric acid levels                                                                                                                                                                                                                                                                    |            |            |                |            | X          |            |             |
| 32. Liver function (liver fat content and non-invasive markers of liver status such as aspartate aminotransferase, alanine aminotransferase, gamma-glutamyltransferase)                                                                                                                 |            |            |                |            | X          |            |             |
| 33. Inflammation markers (C-reactive protein and white blood cell counts and its subtypes (neutrophil, lymphocyte, monocyte, basophils, and eosinophil))                                                                                                                                |            |            |                |            | X          |            |             |
| 34. Other intermediate markers of cardiovascular risk (circulating levels of fasting serum insulin, leptin, C-peptide, hs-CRP, interleukin-6 (IL-6), IL-8, IL-18, tumor necrosis factor- $\alpha$ , MCP-1, and regulated on activation, normal T-cell expressed and secreted cytokines) |            | X          |                |            |            |            |             |
| 35. Results of ECGs and alterations of the cardiac rhythm                                                                                                                                                                                                                               |            |            |                |            | X          |            |             |
| 36. Quality of life (Short -Form 36 quality of life scale)                                                                                                                                                                                                                              |            |            |                | X          |            |            |             |
| 37. Cognitive function (including 6 tests: Mini-Mental State Examination, clock drawing test, semantic and phonemic verbal fluency test, the reverse series of digits test (WAIS-III) and trail making test)                                                                            |            |            | X              |            |            |            |             |
| 38. Psychological and neuropsychological scores (including 3 tests: Beck Depression Inventory (BDI-II), multidimensional scale of weight locus control and screening for comorbid eating disorders with diagnostic criteria)                                                            |            |            | X              |            |            |            |             |
| 39. Medication use (anti-hypertensive, anti-diabetic and lipid-lowering medication)                                                                                                                                                                                                     |            |            | X              |            |            |            |             |

| <b>Other intermediate outcomes are changes in (continued):</b>                                                                                                                                                                    | <b>M-6</b> | <b>Y-1</b> | <b>Y-6</b> | <b>Y-7</b> | <b>Y-8</b> | <b>Y-9</b> | <b>Y-10</b> |
|-----------------------------------------------------------------------------------------------------------------------------------------------------------------------------------------------------------------------------------|------------|------------|------------|------------|------------|------------|-------------|
| 40. Total physical activity (PA), light-PA, and moderate-to-vigorous PA measured by periodically administered REGICOR Short Physical Questionnaire (self-reported data)                                                           | X          | X          | X          |            |            |            |             |
| 41. Reversal of obesity, metabolic syndrome (MetS) and specific criteria for the MetS (abdominal obesity, hypertriglyceridemia, low HDL-cholesterol levels, high blood pressure, and high fasting plasma glucose concentrations). |            |            |            | X          |            |            |             |
| 42. Total physical activity (PA), light-PA, and moderate-to-vigorous PA measured using objective methods, such as accelerometry                                                                                                   |            |            | X          |            |            |            |             |
| 43. Bone density and body composition measured with DXA                                                                                                                                                                           |            |            | X          |            |            |            |             |
| 44. Ambulatory blood pressure, obtained by 24-hour ABPM                                                                                                                                                                           |            |            | X          |            |            |            |             |
| <b>Other sub-studies</b>                                                                                                                                                                                                          |            |            |            |            |            |            |             |
| 45. Analysis of the results in relation to genetic studies (DNA and mRNA)                                                                                                                                                         |            |            |            | X?         |            |            |             |
| 46. Epigenetic studies and overexpression of microRNAs                                                                                                                                                                            |            |            |            | X?         |            |            |             |
| 47. Composition and function of intestinal microbiota by pyrosequencing                                                                                                                                                           |            | X*         |            |            |            |            |             |
| 48. Metabolomics, transcriptomics and proteomics                                                                                                                                                                                  |            |            |            | X?         |            |            |             |

255 \*At 1 year and 3 years of follow-up. #At 5 years of follow-up.

256 1: Besides assessing systolic blood pressure as a continuous trait, we will also assess a 5 mm Hg systolic blood pressure reduction as a clinically  
257 meaningful change (Stamler et al, 1991).

258 2: Besides assessing triglycerides as a continuous trait, we will also assess a 10% triglyceride reduction as a clinically meaningful change. The  
259 reduction of serum triglycerides has been associated with reduced coronary heart disease rates in clinical trials of hypotriglyceridemic agents (Miller, 2011),  
260 but no algorithm relating percent triglyceride decrease to percent risk reduction has been developed. In the general population, there is a graded increase in  
261 risk with increasing fasting or nonfasting triglycerides (Nordestgaard, 2014), hence a 10% reduction can be considered clinically meaningful.

262 3: Besides assessing HDL-cholesterol as a continuous trait, we will also assess a 5% HDL-cholesterol increase as a clinically meaningful change  
263 (Gordon, 1989)

264 4: Besides assessing LDL-cholesterol as a continuous trait, we will also assess a 5% LDL-cholesterol reduction as a clinically meaningful change  
265 (Cholesterol Treatment Trialists' Collaboration, 2010)

## 266 Timing of outcome assessments

267 Weight and waist circumference are measured in duplicate by trained study personnel at  
268 the yearly follow-up visits.

269 Other primary and secondary outcomes will be ascertained yearly by systematic review of  
270 the participants' medical charts by medical doctors who are blinded to the intervention group.  
271 Codified copies of the medical reports in which the outcome is described will be sent to the  
272 Event Ascertainment Committee whose members will confirm the outcome.

273 Blood specimens are collected at odd-year visits and after 8 years of follow-up.

## 274 SECTION 4: STATISTICAL PRINCIPLES

### 275 Confidence intervals and p values

#### 276 Primary outcomes:

277 Given that the list of primary outcomes has been defined *a priori* and that there is  
278 substantial evidence that suggests a potential beneficial effect of the intervention on the  
279 considered outcomes, we understand that no adjustment for multiplicity will be necessary. We  
280 will present point estimates together with 95% confidence intervals. P-values below 0.05 will  
281 be deemed as statistically significant.

#### 282 Secondary outcomes:

283 We will present two forms of confidence intervals for the secondary outcomes: nominal  
284 confidence intervals and, only as ancillary analyses, multiple-testing-adjusted confidence  
285 intervals. Nominal 95% confidence intervals will describe results from a single outcome  
286 assessment. We will also estimate multiple-testing-adjusted confidence intervals based on the  
287 Bonferroni procedure ( $1-\alpha/m$  confidence intervals, where  $m$  is the number of comparisons<sup>1</sup>)  
288 for secondary outcomes, where  $m$  is the total number of secondary outcomes, namely  $m=27$ .  
289 Our reports will primarily focus on nominal confidence intervals based on coherence and  
290 biological plausibility for interpretation of our findings, but we will also add multiple-testing-  
291 adjusted confidence intervals for secondary outcomes, only as ancillary analyses.

292

### 293 Adherence

294 Adherence in the control group will be defined as achieving a score of at least 10 points in  
295 the 14-item screener of adherence to the traditional Mediterranean diet (Schröder et al, 2011).

---

<sup>1</sup>The total number of comparisons will be 27: 1) death from any cause, 2) change in waist circumference, 3) acute coronary syndrome (unstable angina) or coronary revascularization (percutaneous or surgical), 4) atrial fibrillation, 5) peripheral artery disease, 6) heart failure, 7) type-2 diabetes, 8) diabetic nephropathy, 9) diabetic retinopathy, 10) diabetic polyneuropathy, 11) overall dementia and Alzheimer's disease 12) Parkinson's disease, 13) Major unipolar depression, 14) osteoporotic fractures, 15) gallstone disease or cholecystectomy, 16) symptomatic gout, 17) transient ischemic attack, 18) cataract surgery, 19) venous thromboembolism, 20) total cancer, 21) breast cancer, 22) prostate cancer, 23) lung cancer, 24) colorectal cancer, 25) stomach cancer, 26) eating behavior disorder, and 27) surgery for obesity.

296 Adherence in the intervention group will be defined as:  
297 1) weight loss in comparison with baseline weight,  
298 2) increased physical activity according to self-reported leisure-time physical activity  
299 (Minnesota questionnaire assessing METS-min/wk) or improvement in physical fitness  
300 according to the chair-test, and  
301 3) achieving a score of at least 12 points in the 17-item screener of adherence to an  
302 energy-reduced Mediterranean diet.

303

#### 304 Analysis populations

---

305 Main analyses will be conducted based on an intention-to-treat approach (each participant  
306 will remain in the randomly allocated group). Intention-to-treat analyses will be conducted  
307 based on a) participants with full data only and b) analysis with multiple imputation for missing  
308 data.

309 For the per-protocol analysis for weight change, participants in the intervention group will  
310 be censored if:

- 311 a) they show a persistent score of adherence to the energy-reduced Mediterranean diet  
312 below 12 points in two consecutive yearly assessments, or
- 313 b) they show a persistent decrease in physical activity (self-reported information) and  
314 physical fitness (chair test) compared with the baseline information in two consecutive  
315 yearly assessments.

316

317 and participants in the control group will be censored if they show a persistent score  
318 of adherence to the Mediterranean diet (14-item score, based on *ad libitum* energy intake)  
319 below 10 points in two consecutive yearly assessments.

320 In the per-protocol analysis for other outcomes, participants in the intervention group will  
321 be censored if:

- 322 c) they show a persistent score of adherence to the energy-reduced Mediterranean diet  
323 below 12 points in two consecutive yearly assessments, or
- 324 d) they show a persistent decrease in physical activity (self-reported information) and  
325 physical fitness (chair test) compared with the baseline information in two consecutive  
326 yearly assessments, or
- 327 e) they show a persistent weight gain compared with the baseline weight in two  
328 consecutive yearly assessments

329

330 and participants in the control group will be censored if they show a persistent score  
331 of adherence to the Mediterranean diet (14-item score, based on *ad libitum* energy intake)  
332 below 10 points in two consecutive yearly assessments.

333

334 We will also perform analysis on an as-treated basis, classifying participants according to  
335 their adherence to Mediterranean diet, weight loss and physical activity level, independently  
336 of their assigned intervention. This analysis will be complemented with formal analyses of  
337 mediation for the primary outcome (CVD). We will adapt the approaches proposed by Lange  
338 (Lange *et al*, 2011) and Lin (Lin *et al*, 2017), including time-varying mediators and confounders.  
339 These approaches model the mediation effect in a counterfactual framework and can estimate  
340 the direct effect and indirect effects of the lifestyle intervention on CVD risk. Thus, we can  
341 evaluate the mediation effects of both weight loss and through improvement in diet quality  
342 and physical fitness beyond the effects of weight loss.

343 **SECTION 5: TRIAL POPULATION**

344 **Screening data**

345 Table 2 shows the characteristics of the participants who attended the first screening visit  
 346 but were not finally included in the trial and the participants who were finally randomized.

347 **Table 2.** Description of participants who attended the first screening visit but were not finally  
 348 included in the trial and participants who were randomized.

| Characteristics at baseline                 | Non-randomized | Randomized   | p value |
|---------------------------------------------|----------------|--------------|---------|
| N                                           | 2803           | 6874         | -       |
| Age (mean years, SD)                        | 65.9 (5.1)     | 64.9 (4.9)   | <0.001  |
| Female sex (%)                              | 53.8           | 48.5         | <0.001  |
| Baseline weight (mean kg, SD)               | 84.4 (14.0)    | 87.0 (13.0)  | <0.001  |
| Baseline waist (mean cm, SD)                | 109.9 (9.8)    | 110.4 (8.6)  | 0.005   |
| Waist-to-height ratio                       | 66.2 (6.5)     | 66.4 (5.5)   | 0.090   |
| Baseline BMI (kg/m <sup>2</sup> ; mean, SD) | 32.4 (4.3)     | 32.7 (3.4)   | <0.001  |
| Obesity (%)                                 | 66.4           | 75.1         | <0.001  |
| Smoking                                     |                |              |         |
| Current smoker (%)                          | 13.3           | 12.5         | 0.261   |
| Former smoker (%)                           | 35.6           | 43.4         | <0.001  |
| Self-reported diabetes (%)                  | 29.0           | 27.2         | 0.074   |
| Family history of premature CHD (%)         | 14.4           | 16.8         | 0.004   |
| High blood cholesterol (%)                  | 67.9           | 69.3         | 0.178   |
| Total cholesterol (mean mg/dl, SD)          | 201.8 (43.6)   | 202.6 (40.0) | 0.375   |
| LDL cholesterol (mean mg/dl, SD)            | 122.7 (34.4)   | 123.9 (34.1) | 0.163   |
| HDL cholesterol (mean mg/dl, SD)            | 49.8 (13.3)    | 47.8 (11.8)  | <0.001  |
| Triglycerides (mean mg/dl, SD)              | 161.7 (84.8)   | 170.3 (91.3) | <0.001  |
| Glucose (mean mg/dl, SD)                    | 114.6 (32.7)   | 114.8 (30.7) | 0.794   |
| Hypertension (%)                            | 77.8           | 83.1         | <0.001  |
| Non-European origin (%)                     | 2.9            | 2.5          | 0.318   |
| Willingness to change diet (mean, SD)       | 2.5 (0.7)      | 2.7 (0.5)    | <0.001  |

349 **Eligibility**

350 Candidates for the PREDIMED-PLUS trial (Martínez-González et al, 2018) were adults aged  
 351 55-75 years for men and 60-75 years for women with a body mass index  $\geq 27$  and  $< 40$  kg/m<sup>2</sup>  
 352 who met at least three criteria for the metabolic syndrome (Alberti et al, 2009). These criteria  
 353 must be taken into consideration in view of evidence of the beneficial role of the  
 354 Mediterranean diet on metabolic syndrome (Kastorini et al, 2011, Babio et al, 2014), insulin

355 resistance and diabetes (Salas-Salvadó et al, 2014), especially when accompanied by a program  
 356 of physical activity for endurance (Fernández et al, 2012). Approximately, 50% of the study  
 357 population is made of women and diabetic participants do not exceed 27% of the total cohort.  
 358 Individuals who participated in the PREDIMED trial were not eligible to participate in  
 359 PREDIMED-PLUS.

360 **Recruitment**

361 Figure 2 shows the flow-chart of participants in the PREDIMED-Plus trial.

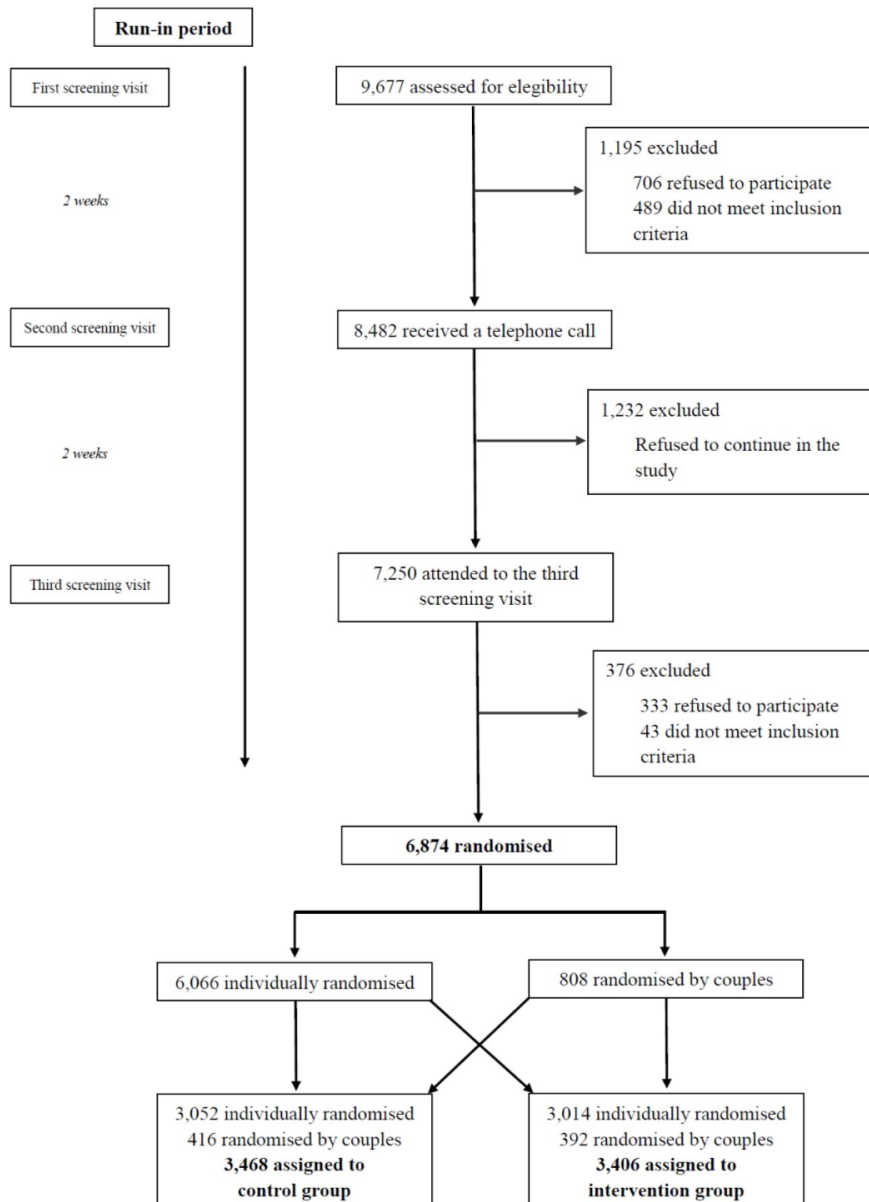

362

363 **Figure 2. Flow-chart of participant recruitment and randomization in the PREDIMED-Plus**  
 364 **trial.**

365

366 Information on follow-up will be added to this flow-chart for final analyses.

367

368 Withdrawal/follow-up

---

369 Follow-up will be based on:

- 370 - yearly follow-up visits
- 371 - yearly systematic review of medical charts
- 372 - consultation of the National Death Index for participants with no information on
- 373 follow-up for 1 year

374 Participants will be considered to be lost-to-follow-up if there is no available information in  
375 the above-mentioned sources of information for at least 2 years.

376 Participants who withdraw have several alternatives such as:

- 377 - no longer willing to be contacted but not reluctant to have their medical charts
- 378 reviewed. In this case, participants will be follow-up based on the available
- 379 information in their medical records
- 380 - explicitly asking to cancel their participation or withdraw their consent: they will be
- 381 considered withdrawals and their future information will no longer be accessed.

382 The number of participants in each of these categories will be included in the study flow-  
383 chart. Information on losses-to-follow-up and withdrawals according to allocation group  
384 will be summarized as:

- 385 - number of participants who were lost-to-follow-up for at least 2 years
- 386 - participants who asked to cancel their participation or withdrew their consent.

387

388 Baseline participants' characteristics

---

389 Description of participants' baseline characteristics will include:

- 390 - Number of participants in each intervention group
- 391 - Number of participants individually randomized and number of participants
- 392 randomized together with another person from the same household

393

394 A. Qualitative traits: summarized with number and percentages:

- 395 - Female sex
- 396 - Obesity
- 397 - Smoking status: never, former, current
- 398 - Self-reported baseline diabetes
- 399 - Self-reported family history of coronary heart disease
- 400 - Self-reported baseline high blood cholesterol
- 401 - Self-reported baseline hypertension
- 402 - Self-reported previous depression
- 403 - Educational level
- 404 - Origin: European vs. non-European
- 405 - Marital status
- 406 - Living alone
- 407 - Being retired
- 408 - Previous weight-loss dieting

409



- 410 B. Quantitative traits: summarized with means and standard deviations:
- 411 - Age
  - 412 - Baseline weight
  - 413 - Baseline waist circumference
  - 414 - Baseline waist-to-height ratio
  - 415 - Baseline body weight
  - 416 - Total cholesterol
  - 417 - LDL cholesterol
  - 418 - HDL cholesterol
  - 419 - Triglycerides
  - 420 - Glucose
  - 421 - Systolic blood pressure
  - 422 - Diastolic blood pressure
  - 423 - Leisure-time physical activity
  - 424 - Chair test
  - 425 - Adherence to the energy-restricted Mediterranean diet
  - 426 - Adherence to the traditional Mediterranean diet
  - 427 - Total energy intake
  - 428 - Total fat intake
  - 429 - Carbohydrate intake
  - 430 - Protein intake
  - 431 - Alcohol intake
  - 432 - Dietary fiber intake
  - 433 - Willingness to change diet

## 434 SECTION 6: ANALYSIS

---

### 435 Outcome definitions

---

#### 436 A. Primary outcomes

#### 437 1. Non-fatal acute coronary syndrome (acute myocardial infarction), non-fatal stroke or 438 cardiovascular mortality.

439 1.a. Acute myocardial infarction (MI) are defined according to the third universal definition of  
440 MI on behalf of the Joint ESC/ACCF/AHA/WHF Task Force as evidence of myocardial  
441 necrosis in a clinical setting consistent with acute myocardial ischemia.

442 Any one of the following criteria meets the diagnosis for MI:

- 443 • Detection of a rise and/or fall of cardiac biomarker values [preferably cardiac troponin  
444 (cTn)] with at least one value above the 99th percentile upper reference limit (URL)

445 AND

- 446 • At least one of the following:

447 (i) Symptoms of ischemia.

448 (ii) New or presumed new significant ST-segment–T wave (ST–T) changes  
449 or new left bundle branch block.

- 450 (iii) Development of pathological Q waves in the ECG.
- 451 (iv) Imaging evidence of new loss of viable myocardium or new regional  
452 wall motion abnormality.
- 453 (v) Identification of an intracoronary thrombus by angiography.

454 Prior MI

455 Any one of the following criteria meets the diagnosis for prior MI:

456 • Pathological Q waves with or without symptoms in the absence of non-ischemic  
457 causes.

458 • Imaging evidence of a region of loss of viable myocardium that is thinned and fails  
459 to contract, in the absence of a non-ischemic cause.

460 • Pathological findings of a prior MI

461 1.b. Stroke is defined as an acute neurological deficit lasting more than 24 hours caused by an  
462 abrupt impairment of brain function due to blockage of blood flow in a particular artery  
463 supplying the brain (thrombosis or arterial embolism) or a cerebral haemorrhage.

464 Ischemic Stroke is defined following the updated definition of stroke for the 21<sup>st</sup>  
465 Century: A Statement for Healthcare Professionals from the American Heart  
466 Association/American Stroke Association as an episode of neurological dysfunction  
467 caused by focal cerebral, spinal, or retinal infarction. Central nervous system (CNS)  
468 infarction is brain, spinal cord, or retinal cell death attributable to ischemia, based on:

469 1. Pathological, imaging, or other objective evidence of cerebral, spinal cord, or  
470 retinal focal ischemic injury in a defined vascular distribution;

471 2. Clinical evidence of cerebral, spinal cord, or retinal focal ischemic injury based on  
472 symptoms persisting  $\geq 24$  hours or until death, and exclusion of other potential  
473 causes such as hypoglycaemia or seizures.

474 Silent CNS infarction are not considered as a primary end-point if defined as imaging  
475 or neuropathological evidence of CNS infarction without a history of acute neurological  
476 dysfunction attributable to the lesion.

477 Hemorrhagic Stroke. Stroke caused by intracerebral hemorrhage is defined as rapidly  
478 developing clinical signs of neurological dysfunction attributable to an intracerebral  
479 hemorrhage, defined as a focal collection of blood within the brain parenchyma or  
480 ventricular system that is not caused by trauma. Stroke caused by subarachnoid  
481 hemorrhage is defined as a rapidly developing signs of neurological dysfunction and/or  
482 headache because of bleeding into the subarachnoid space, which is not caused by  
483 trauma.

484 Silent cerebral hemorrhage is not considered as primary end-point. It is defined as a  
485 focal collection of chronic blood products within the brain parenchyma, subarachnoid  
486 space, or ventricular system detected at neuroimaging or neuropathological examination  
487 that is not caused by trauma and without a history of acute neurological dysfunction  
488 attributable to the lesion.

489 1.c. Cardiovascular mortality: Includes sudden death and non-sudden cardiovascular death.

490 Sudden (cardiac) death is due to cessation of cardiac activity with hemodynamic  
491 collapse, typically due to sustained ventricular tachycardia/ventricular fibrillation. It may  
492 be:

493 — Witnessed instantaneously in a previously stable patient. This may occur with or  
494 without preceding signs or symptoms, or may occur immediately following sudden  
495 dyspnea, light-headedness, or palpitations.

496 — Unwitnessed. Patient found dead who at the time of last witnessed contact was in  
497 his/her usual state of health without medical complaints or obvious difficulty. This  
498 applies to patients dying during sleep.

499 Non-sudden cardiac death: Includes deaths of patients from acute pulmonary edema  
500 with severe, progressive heart failure, cardiogenic shock, or after a recent cardiac surgical  
501 procedure.

502 Non-cardiac vascular death: Includes deaths due to thromboembolic events, stroke,  
503 dissecting aneurysm and peripheral artery disease.

504 2. Weight change. The study nurse records weight in duplicate at each follow-up visit. The  
505 measurements are made according to the study manual of operations and with participants  
506 dressed in light clothing and no shoes and accessories. The mean of the two measurements  
507 will be used.

508

#### 509 B. Secondary outcomes

510 1. Total mortality. This endpoint comprises all causes of death, including those from CVD (see  
511 point 1c of primary end-point), as well as trauma, renal failure, neoplasia, sepsis, suicide  
512 and death of undetermined cause. All deaths will be confirmed by reviewing the National  
513 Death Index.

514 2. Changes in waist circumference. The study nurse measures waist circumference at each  
515 follow-up visit according to the manual of operations.

516 3. Non-ST-segment elevation acute coronary syndrome (unstable angina): The diagnosis of  
517 unstable angina is made following the definition of the ESC Guidelines for the management  
518 of acute coronary syndromes in patients presenting without persistent ST-segment  
519 elevation; It requires the presence of at least one of the following clinical characteristics:

520 a. Prolonged (>20 min) anginal pain at rest.

521 b. New onset (de novo) angina (Class II or III of the Classification of the Canadian  
522 Cardiovascular Society).

523 c. Recent destabilization of previously stable angina with at least Canadian  
524 Cardiovascular Society Class III angina characteristics (crescendo angina).

525 4. Coronary revascularization (percutaneous or surgical): The two main indications for  
526 percutaneous or surgical revascularization are:

- 527 1) Patients with unstable angina or non-ST-segment elevation acute coronary syndrome.
- 528 2) Patients considered likely to benefit from such surgery on the basis of the location and  
529 severity of chest pain, the number of vessels affected, and the presence of left  
530 ventricular dysfunction.
- 531 5. Heart failure. Acute and chronic heart failure (HF) is a syndrome in which patients have  
532 typical symptoms and signs resulting from an abnormality of cardiac structure or function.  
533 The cardinal manifestations of HF are dyspnea and fatigue, which may limit exercise  
534 tolerance, and fluid retention, which may lead to pulmonary and/or splanchnic congestion  
535 and/or peripheral edema.
- 536 5.a. The diagnosis of HF with Reduced Ejection Fraction requires three conditions to be  
537 satisfied: 1. Symptoms typical of HF; 2. Signs typical of HF and 3. Reduced ejection  
538 fraction (< 40%)
- 539 5.b. The diagnosis of HF with Preserved Ejection Fraction requires four conditions to be  
540 satisfied: 1. Symptoms typical of HF; 2. Signs typical of HF; 3. Normal or only mildly  
541 reduced left ventricular ejection fraction and non-dilated left ventricle; and 4. Relevant  
542 structural heart disease (left ventricular hypertrophy/left atrium enlargement) and/or  
543 diastolic dysfunction
- 544 5.c. A Heart Failure event may include hospitalization or an urgent outpatient visit. In this  
545 setting the event needs to meet ALL of the following criteria:
- 546 - The patient exhibits documented new or worsening symptoms of HF on presentation,  
547 including at least ONE of the following: Dyspnea, decreased exercise tolerance, fatigue  
548 or other symptoms of worsened end-organ perfusion or volume overload.
- 549 - The patient has objective evidence of new or worsening HF, consisting of at least TWO  
550 physical examination findings OR one physical examination finding and at least ONE  
551 laboratory criterion), including: Physical examination findings considered to be due to  
552 heart failure, including new or worsened peripheral edema, increasing abdominal  
553 distention or ascites (in the absence of primary hepatic disease),  
554 rales/crackles/crepitations at pulmonary auscultation, increased jugular venous  
555 pressure and/or hepatojugular reflux, S3 gallop, and clinically significant or rapid  
556 weight gain thought to be related to fluid retention
- 557 - Laboratory evidence of new or worsening HF, if obtained within 24 hours of  
558 presentation, including: Increased B-type natriuretic peptide (BNP)/ N-terminal pro-  
559 BNP (NT-proBNP) concentrations OR cardiological evidence of pulmonary congestion  
560 OR echocardiographic data of congestion or decreased cardiac output.
- 561 - The patient receives initiation or intensification of specific treatment for HF.
- 562 6. Peripheral artery disease. Ascertainment is made according to the Inter-Society  
563 Consensus for the Management of Peripheral Arterial Disease (TASC II) and ESC Guidelines  
564 for the diagnosis of peripheral artery disease. For participants with intermittent  
565 claudication, aged 60-69 with one cardiovascular risk factor, or aged  $\geq 70$  years and a  
566 resting ankle-brachial systolic pressure index  $\leq 0.90$ , or an abnormal echo-Doppler  
567 examination, magnetic resonance imaging, or arteriography are considered as diagnostic  
568 (confirmed case).

569 7. Venous thromboembolism (VTE): all VTE need to satisfy the standard diagnosis criteria for  
570 venous thrombosis or Pulmonary (thromb-) Embolism (PE) in the general population (see  
571 below 1-3). The diagnosis should be confirmed by objective imaging techniques (including  
572 echography, phlebography, pulmonary computed tomography angiography (angioCTA),  
573 NMR, etc.) and not only be based on the clinical suspicion.

574 Standard diagnosis criteria for VTE in clinical studies:

575 1. Deep venous thrombosis, defined as the loss of venous compressibility or the inability of  
576 filling the deep vein intraluminal segment at the lower/upper limbs, as detected by  
577 echography with venous compression or phlebography, respectively.

578 • The presence of thrombus at the distal lower limb (distal from the popliteal vein) qualifies  
579 for primary VTE only if it is asymptomatic.

580 • All proximal thrombus qualify for final primary end-point if detected by imaging techniques  
581 (echography or radiology), regardless of whether it is or not asymptomatic.

582 2. Pulmonary Embolism (PE) is defined as:

583 Contrast pulmonary arteriography:

584 • Defects in intraluminal filling, as contrasted with two projections.

585 • Sudden stoppage of the contrast in one or several vessels with a diameter greater than 2.5  
586 mm

587 • Pulmonary scintigraphy based on ventilation/perfusion (V/Q):

588 o A V/Q-pulmonary scintigraphy with high probability of PE in patients with no low clinical  
589 probability of PE.

590 • Pulmonary angiography using computed tomography:

591 o Defects in filling sub-segmental or more proximal vessels

592 3. Fatal PE is defined as:

593 • Death exclusively caused by PE and/or its confirmation at autopsy or using radiology  
594 techniques

595 Important considerations:

596 a) Superficial venous thrombophlebitis should not be described as VTE.

597 b) It is highly recommended to describe VTE according to the anatomic position:

598 • Lower limbs

599 • Upper limbs

600 • Pulmonary embolism

601 • Others: vessels at the splanchnic level, cerebral veins, etc.

602 c) The description of the VTE is highly convenient (for instance, distal to popliteal vein vs.  
603 proximal VTE; sub-segmental level vs. central PE)

604 d) VTE associated with a central catheter (for instance, deep venous thrombosis at the upper  
605 limbs) should be reported separately.

606 e) Incidental VTE should be differentiated from any other symptomatic events.

607 8. Atrial fibrillation (AF): AF is defined following the Guidelines of the American College of  
608 Cardiology Foundation/American Heart Association Task Force on Practice Guidelines  
609 together with the European Society of Cardiology, the European Heart Rhythm Association,  
610 and the Heart Rhythm Society, as a cardiac arrhythmia with the following characteristics:

611 (1) The surface ECG shows 'absolutely' irregular RR intervals, i.e., RR intervals that do  
612 not follow a repetitive pattern.

613 (2) There are no distinct P waves on the surface ECG. Some apparently regular atrial  
614 electrical activity may be seen in some EKG leads, most often in lead V1.

615 (3) The atrial cycle length (when visible), i.e., the interval between two atrial  
616 activations, is usually variable and <200 ms (>300 bpm).

617

618 9. Type 2-diabetes. New-Onset Type 2 Diabetes cases are diagnosed following the  
619 recommendations of the American Diabetes Association:

620 1. HbA1C  $\geq 6.5\%$ . This test should be performed in a laboratory using a method that is  
621 National Glycohemoglobin Standardization Program (NGSP) certified and standardized  
622 to the DCCT assay. OR

623 2. Fasting plasma glucose (FPG)  $\geq 126$  mg/dL (7.0 mmol/L). Fasting is defined as no caloric  
624 intake for at least 8 hours OR

625 3. Two-hour plasma glucose (PG)  $\geq 200$  mg/dL (11.1 mmol/L) during an oral glucose  
626 tolerance test (OGTT). This test should be performed as described by the WHO, using a  
627 glucose load containing the equivalent of 75 g anhydrous glucose dissolved in water OR

628 4. In a patient with classic symptoms of hyperglycemia or hyperglycemic crisis, a random  
629 plasma glucose  $\geq 200$  mg/dL (11.1 mmol/L).

630 In the absence of unequivocal hyperglycemia, results should be confirmed by repeat  
631 testing according to the guidelines of the American Diabetes Association.

632 10. Type-2 diabetes complications. Participants are assessed yearly for microvascular  
633 complications of diabetes:

634 1. Diabetic nephropathy: Kidney disease in diabetes is defined based on the alteration of  
635 glomerular filtration rate (GFR) and /or the presence of persistent albuminuria at levels  
636 of 30 mg/24 h or more (normal albumin excretion is currently defined as < 30 mg/24 h).  
637 GFR is estimated through a quantitative formula, the CKD-Epi equation, that measures  
638 the progression of kidney involvement. Persistent albuminuria is determined by the  
639 urine albumin to creatinine ratio (normal <30 mg albumin/g creatinine) in a routine

640 morning urine sample. Because of variability in urinary albumin excretion, two of three  
641 morning specimens collected within a 3- to 6-month period should be abnormal before  
642 considering a patient to have developed increased urinary albumin excretion or a  
643 progression of albuminuria. The presence of one or two of the above criteria indicates  
644 renal disease in these patients and the requirement for appropriate follow-up for  
645 progression of renal disease according to the guidelines of the American Diabetes  
646 Association.

647 2. Diabetic retinopathy: Diagnosed by ophthalmologic examination and/or treatment with  
648 laser photocoagulation according to the guidelines of the American Diabetes  
649 Association.

650 3. Diabetic polyneuropathy: Diagnosed by clinical symptoms, neurological examination and  
651 results of electrophysiological studies of peripheral nerves according to the guidelines of  
652 the American Diabetes Association.

653 \*Kidney damage defined as abnormalities in urine, blood, or imaging tests.

654 11. Cancer. All cancers except non-melanoma skin cancer are considered. Cancer cases are  
655 coded according to the International Classification of Diseases (ICD 10) of the World Health  
656 Organization.

657 12. Dementia/Alzheimer's disease. Cases are ascertained according to the Recommendations  
658 from the National Institute on Aging and the Alzheimer's Association workgroup  
659 (McKhann et al, , 2011) or if a diagnosis of dementia is reported by a neurologist.

660 13. Other dementias: Cases are ascertained according to McKhann et al, 2011 criteria (see  
661 below) or if a diagnosis of dementia is reported by a neurologist.

662 Dementia is diagnosed when there are cognitive or behavioral (neuropsychiatric) symptoms  
663 that: 1. Interfere with the ability to function at work or at usual activities; and 2.  
664 Represent a decline from previous levels of cognitive functioning; and 3. Are not  
665 explained by delirium or major psychiatric disorder; 4. Cognitive impairment is detected  
666 and diagnosed through a combination of (1) history-taking from the patient and a  
667 knowledgeable informant and (2) an objective cognitive assessment; 5. The cognitive or  
668 behavioral impairment involves a minimum of two cognitive domains.

669 14. Parkinson's disease. Cases are ascertained according to the diagnostic criteria described  
670 by Hughes et al (1992) or if reported by a neurologist.

671 15. Unipolar depression. The diagnosis must be made according to the DSM-V criteria. In this,  
672 definition major depression, persistent depression, and other depressions included in  
673 Depressive Disorders (DSM V) are accepted. Diagnosis of depression made by primary  
674 care physicians or psychiatrist in participants treated with antidepressant drugs for more  
675 than 6 months is accepted. If this is the case, ICD 10 (International Statistical Classification  
676 of Diseases and Related Health Problems, 10th version) diagnosis of depressive episodes  
677 are also accepted. For physicians and psychiatrists not using ICD 10 or DSM V, a positive  
678 response to the two questions included in the NICE clinical guidelines is recommended  
679 (<https://www.nice.org.uk>).

680 16. Osteoporotic fractures. Low-energy fracture is defined as the fracture produced by a  
681 same-level fall. Fractures are identified from X-rays reports obtained from at least two

682 radiological reports. High trauma fractures, potentially pathological fractures (e.g., cancer  
683 or Paget’s disease), or fractures of the head, fingers and toes are not considered.

684 17. Gallstone disease or cholecystectomy: Gallstone disease is diagnosed according to the  
685 findings obtained by imaging techniques including abdominal ultrasonography, computed  
686 tomography or magnetic resonance imaging. Diagnosis of cholecystectomy require the  
687 corresponding surgical report.

688 18. Symptomatic gout: Defined following the criteria of the *American College of Rheumatology*.  
689 Typically, the disease first presents as arthritis that is acute and episodic, but can be  
690 recurrent. Gout can also present as chronic arthritis of one or more joints. This clinical  
691 picture is built on a foundation of an excess body burden of uric acid, manifested in part  
692 by hyperuricemia, which is defined as serum uric acid levels greater than 7.0 mg/dL.

693 19. Transient Ischemic Attack: The diagnosis must be made according to the Scientific  
694 Statement of the American Heart Association/American Stroke Association Stroke Council:  
695 a transient episode of neurological dysfunction caused by focal brain, spinal cord, or  
696 retinal ischemia, without acute infarction demonstrated by neuroimaging, preferably  
697 magnetic resonance imaging techniques.

698 20. Cataract surgery: Defined by a medical report of cataract surgery.

699 21. Surgery for obesity: Defined by a medical report of bariatric surgery.

700

### 701 C. Intermediate markers

702 Changes in nutrient intake and dietary patterns will be determined by changes in the 17-  
703 item score of adherence to the energy-restricted Mediterranean diet (intensive intervention  
704 group) or the 14-item score (control group) and by changes in food and nutrient intake  
705 determined by the 143-item food frequency questionnaire administered during follow-up.

706 Changes in systolic and diastolic blood pressure, serum lipid concentrations, fasting  
707 glucose levels, renal function, uric acid, hemoglobin A1C, C-reactive protein, and liver function  
708 are evaluated yearly for the duration of the intervention.

709 Yearly, are also evaluated the percentage of participants in each group requiring anti-  
710 hypertensive, anti-diabetic or lipid-lowering medication, results of ECGs, cognitive function,  
711 quality of life, and psychological and neuropsychological questionnaire scores.

712

### 713 Analysis methods

---

#### 714 Analysis methods

715 For primary and secondary outcomes –except for changes in weight and waist  
716 circumference– Cox regression models will be used for assessing the association between the  
717 intervention and the outcome. Time-at-risk will be given by the time between the baseline visit  
718 (in which the participants learn about their allocation group) and the date the outcome  
719 happened. For those participants who are right censored, follow-up will finish at the last  
720 available date of follow-up (last visit or last date in medical records, whichever occur later). For



721 participants with follow-up longer than the closing date of the database, the closing date of the  
722 database will be considered as censoring date. Also, for fatal outcomes, date of death will be  
723 considered as end of follow-up.

724 For changes in weight, we will use multilevel, mixed-effects linear regression models with  
725 repeated measurements with a random intercept and taking into consideration the intra-  
726 cluster correlation of members of the same household. We will assess within group changes as  
727 well as between group changes during follow-up. The center will be included as a random  
728 factor.

729 Also, for weight changes, we will define a weight loss of 5% as clinically meaningful  
730 (Williamson et al, 2015). Baseline body weight in the PREDIMED-Plus trial was 86.5 kg, thus a 5%  
731 loss is 4.3 kg. Two landmark trials of lifestyle interventions in high-risk population groups (with  
732 high BMI and impaired glucose tolerance, like many participants in the PREDIMED-Plus trial)  
733 achieved average weight losses of 3–6 kg, translating into highly significant reductions in  
734 diabetes risk (Tuomilehto et al, 2001, Knowler et al, 2002). Similar 58% reduction in diabetes  
735 risk were observed in both RCTs.

736 As an ancillary analysis to changes in weight, we will assess changes in BMI with BMI as a  
737 continuous trait with multilevel, mixed-effects linear regression models with repeated  
738 measurements with a random intercept and taking into consideration the intra-cluster  
739 correlation of members of the same household. We will assess within group changes as well as  
740 between group changes during follow-up. Also, we will consider a 5% loss in BMI as a clinically  
741 meaningful change. Baseline BMI in the PREDIMED-Plus cohort was 32.5 kg/m<sup>2</sup> hence a 5% loss  
742 is 1.6 kg/m<sup>2</sup>. In a previous large prospective study (Feldman et al, 2017), among participants  
743 with baseline BMI 30-34.9 kg/m<sup>2</sup>, moderate loss (–3.0 to –7.0%) resulted in an OR for diabetes  
744 of 0.38 (95% CI, 0.19- 0.79). Therefore, 5% loss in BMI is definitively a change of a sufficient  
745 size as to be clinically meaningful.

746 Finally, for waist circumference changes, we will use multilevel, mixed-effects linear  
747 regression models with repeated measurements with a random intercept and taking into  
748 consideration the intra-cluster correlation of members of the same household and the center  
749 as another random factor. We will assess within group changes as well as between group  
750 changes during follow-up. As for weight and BMI change, a 5% reduction in waist  
751 circumference will be considered as clinically meaningful. Baseline waist circumference was  
752 108 cm in the PREDIMED-Plus cohort and a 5% reduction is 5.4 cm. In the cited Finnish study  
753 (Tuomilehto et al, 2001) the lifestyle intervention that reduced diabetes risk by 58% resulted in  
754 a mean 4.4 cm reduction in waist circumference.

#### 755 Adjustment for covariates

756 Main analyses will be crude analyses based on intention-to-treat approaches. Robust  
757 variance estimators will consider the intra-cluster correlation of members of the same  
758 household and Cox regression models will be stratified by center.

759 For the combined outcome, additional analyses will be stratified according to recruitment  
760 center and adjusted for sex, age, educational level, smoking status, baseline hypertension,  
761 baseline dyslipidemia, baseline type 2 diabetes, family history of coronary heart disease, body-  
762 mass index, waist-to-height ratio and baseline physical activity (METS-min/d, as derived from  
763 the self-reported physical activity questionnaire).

764 When assessing changes in weight as an outcome, models will be also adjusted for  
765 recruitment center, sex, age, educational level, smoking status, baseline hypertension,

766 baseline dyslipidemia, baseline diabetes, family history of coronary heart disease, and baseline  
767 physical activity.

768 Secondary outcomes may include some further specific confounders.

769 Methods used for assumptions to be checked for statistical methods

770 Proportionality of the hazards will be assessed with Schoenfeld's residual test and testing  
771 time-varying-covariates.

772 Alternative methods to be used if distributional assumptions do not hold

773 If hazards are not proportional, we will reassess the proportionality assumption by  
774 including some potential confounders as strata. If hazards remain non-proportional, we will  
775 describe the effect of the intervention separately for different follow-up periods.

776 Planned sensitivity analyses for the outcomes

777 Main analyses will be based on an intention-to-treat approach with completers only. As  
778 sensitivity analysis, the intention-to-treat approach will be repeated with multiple imputation  
779 for missing outcomes (see below).

780 Also, per-protocol analyses will be done for the primary outcome.

781 Planned subgroup analyses

782 Subgroup analyses will be done by sex, age (median age as cut-off point), educational level  
783 (2 categories), baseline diabetes, number of criteria for the metabolic syndrome (3 vs.  $\geq 4$ ),  
784 smoking, body-mass index (obese and non-obese), and baseline score of adherence to the  
785 energy-reduced Mediterranean diet.

786

787 Missing data

---

788 Multivariate imputation will be done with chained equations (STATA "mi" command),  
789 generating 20 imputations for each missing measurement from regression equations to predict  
790 missing outcomes among participants lost for 2 years or longer. The imputation models  
791 included as predictors will be sex, age, smoking, leisure-time physical activity, baseline BMI,  
792 baseline weight, prevalent diabetes, prevalent hypertension, prevalent hypercholesterolemia,  
793 family history of coronary heart disease, intervention group, being 2nd member of the same  
794 household and educational level.

795

796 Additional analyses

---

797 For the per-protocol analysis, causal inference methods will be used (inverse probability  
798 weighting, G-formula) (Estruch et al, 2018).

799 Let  $A_j$  be 1 if the participant adheres to the intervention, and 0 otherwise (from the  
800 moment on when he/she do no longer adhere to it). The per-protocol effect is the effect of  $A_j$ ,  
801 and can be estimated using the same approach as the intention-to-treat effect with one

802 important difference: individuals are artificially censored at the end of the interval when they  
803 deviate from the study protocol because they stopped adhering to the intervention, i.e., when  
804  $A_j=0$ .

805 Of course, to determine whether participants adhere during given year, they must provide  
806 information on adherence at the subsequent follow-up visit, and for that, they must attend the  
807 follow-up visit in the first place. Therefore, there are 3 different censoring mechanisms in this  
808 per-protocol analysis of interval studies:

809 1) Incomplete follow-up. This type of censoring arises when individuals do not attend a  
810 visit (with a pre-specified period of 12 months). Let  $C_j$  be an indicator of censoring by  
811 incomplete follow-up at month  $j$ .

812 2) Insufficient information to determine adherence among those who attend a visit. Let  $N_j$   
813 be an indicator for attending a visit at time  $j$  (1: yes, 0: no). Among those with  $N_j=1$ , we define  
814 the censoring indicator  $R_j$  (1: yes, 0: no) for missing information on  $A_j$ .

815 3) No adherence. Among those with  $N_j=1$  and  $R_j=0$ , participants are censored if  $A_j=0$

816 Censoring by any of the above mechanisms may introduce bias. We will estimate inverse  
817 probability weights to adjust for the potential selection bias (Hernán, 2013; Hernán, in press)  
818 under the assumption that loss to follow-up, data collection, and adherence were effectively  
819 randomized at each time point given the measured pre- and post-randomization prognostic  
820 factors. Information on the specific methods that should be used to estimate the probabilities,  
821 to compute the stabilized weights, and to fit the models, together with an example, can be  
822 found in Estruch et al, 2018, Supplemental appendix, pages 36-38.

823

## 824 [Harms](#)

---

825 Information on adverse effects (headache, fatigue, constipation and increased bowel  
826 rhythm) is collected at 6 months and yearly thereafter. This information will be described as  
827 percentage across intervention groups in the report of the primary outcome.

828

## 829 [References](#)

---

830 Alberti KG, Eckel RH, Grundy SM, Zimmet PZ, Cleeman JI, Donato KA, et al, Harmonizing  
831 the metabolic syndrome: a joint interim statement of the International Diabetes Federation  
832 Task Force on Epidemiology and Prevention; National Heart, Lung, and Blood Institute;  
833 American Heart Association; World Heart Federation; International Atherosclerosis Society;  
834 and International Association for the Study of Obesity. *Circulation*. 2009;120(16):1640-5.

835 Babio N, Toledo E, Estruch R, Ros E, Martínez-González MA, Castañer O, et al,  
836 Mediterranean diets and metabolic syndrome status in the PREDIMED randomized trial. *CMAJ*.  
837 2014;186(17):E649-57.

838 Cholesterol Treatment Trialists' (CTT) Collaboration. Efficacy and safety of more intensive  
839 lowering of LDL cholesterol: a meta-analysis of data from 170,000 participants in 26  
840 randomised trials. *Lancet*. 2010;376:1670-81

- 841 Estruch R, Ros E, Salas-Salvadó J, Covas MI, Corella D, Arós F, et al, Primary prevention of  
842 cardiovascular disease with a Mediterranean diet. *N Engl J Med*. 2018 Jun 21;378(25):e34.
- 843 Fernández JM, Rosado-Álvarez D, Da Silva Grigoletto ME, Rangel-Zúñiga OA, Landaeta-Díaz  
844 LL, Caballero-Villarraso J, López-Miranda J, Pérez-Jiménez F, Fuentes-Jiménez F. Moderate-to-  
845 high-intensity training and a hypocaloric Mediterranean diet enhance endothelial progenitor  
846 cells and fitness in subjects with the metabolic syndrome. *Clin Sci (Lond)*. 2012;123(6):361-73.
- 847 Feldman AL, Griffin SJ, Ahern AL, Long GH, Weinehall L, Fhärm E, Norberg M, Wennberg P.  
848 Impact of weight maintenance and loss on diabetes risk and burden: a population-based study  
849 in 33,184 participants. *BMC Public Health*. 2017;17(1):170.
- 850 González-Muniesa P, Martínez-González MA, Hu FB, Després JP, Matsuzawa Y, Loos RJF, et  
851 al, Obesity. *Nat Rev Dis* 2017; 3:17034.
- 852 Gordon DJ, Probstfield JL, Garrison RJ, et al, High-density lipoprotein cholesterol and  
853 cardiovascular disease. Four prospective American studies. *Circulation*. 1989;79:8–15.
- 854 Hernán MA, Hernández-Díaz S, Robins JM. Randomized trials analyzed as observational  
855 studies. *Ann Intern Med* 2013;159:560-2.
- 856 Hernán MA, Robins JM. Causal inference. Boca Raton, FL: Chapman & Hall/CRC (in press).
- 857 Hughes AJ, Ben-Shlomo Y, Daniel SE, Lees AJ. What features improve the accuracy of  
858 clinical diagnosis in Parkinson's disease: a clinicopathologic study. *Neurology* 1992;42:1142-6.  
859 Erratum in: *Neurology* 1992;42(7):1436.
- 860 Kastorini CM, Milionis HJ, Esposito K, Giugliano D, Goudevenos JA, Panagiotakos DB. The  
861 effect of Mediterranean diet on metabolic syndrome and its components: a meta-analysis of  
862 50 studies and 534,906 individuals. *J Am Coll Cardiol*. 2011;57(11):1299-313.
- 863 Knowler WC, Barrett-Connor E, Fowler SE, Hamman RF, Lachin JM, Walker EA, Nathan DM,  
864 Diabetes Prevention Program Research G. Reduction in the incidence of type 2 diabetes with  
865 lifestyle intervention or metformin. *N Engl J Med*. 2002;346(6):393–403.
- 866 Lange T, Hansen J V. Direct and Indirect Effects in a Survival Context. *Epidemiology*.  
867 2011;22(4):575-581.
- 868 Lin S-H, Young JG, Logan R, VanderWeele TJ. Mediation analysis for a survival outcome  
869 with time-varying exposures, mediators, and confounders. *Stat Med*. 2017;36(26):4153-4166.
- 870 Look AHEAD Research Group, Wing RR. Long-term effects of a lifestyle intervention on  
871 weight and cardiovascular risk factors in individuals with type 2 diabetes mellitus: four-year  
872 results of the Look AHEAD trial. *Arch Intern Med*. 2010;170(17):1566-75.
- 873 Martínez-González MA, Corella D, Salas-Salvadó J, Ros E, Covas MI, Fiol M, et al, Cohort  
874 profile: design and methods of the PREDIMED study. *Int J Epidemiol* 2012; 41:377-85.
- 875 Martínez-González MA, Buil-Cosiales P, Corella D, Bulló M, Fitó M, Vioque J, et al, Cohort  
876 Profile: Design and methods of the PREDIMED-Plus randomized trial. *Int J Epidemiol*. 2018 Nov  
877 22. doi: 10.1093/ije/dyy225. [Epub ahead of print]

878 McKhann GM, Knopman DS, Chertkow H, Hyman BT, Jack CR Jr, Kawas CH, et al. The  
879 diagnosis of dementia due to Alzheimer's disease: recommendations from the National  
880 Institute on Aging-Alzheimer's Association workgroups on diagnostic guidelines for Alzheimer's  
881 disease. *Alzheimers Dement*. 2011;7(3):263-9.

882 Miller M, Stone NJ, Ballantyne C, Bittner V, Criqui MH, Ginsberg HN, et al. Triglycerides and  
883 cardiovascular disease: a scientific statement from the American Heart Association. *Circulation*.  
884 2011;123(20):2292-333.

885 Nordestgaard BG, Varbo A. Triglycerides and cardiovascular disease. *Lancet*.  
886 2014;384:626–35.

887 O'Brien PC, Fleming TR. A multiple testing procedure for clinical trials. *Biometrics*.  
888 1979;35(3):549-56.

889 Sacks FM, Bray GA, Carey VJ, Smith SR, Ryan DH, Anton SD, McManus K, Champagne CM,  
890 Bishop LM, Laranjo N, Leboff MS, Rood JC, de Jonge L, Greenway FL, Loria CM, Obarzanek E,  
891 Williamson DA. Comparison of weight-loss diets with different compositions of fat, protein,  
892 and carbohydrates. *N Engl J Med*. 2009;360(9):859-73.

893 Salas-Salvadó J, Bulló M, Estruch R, Ros E, Covas MI, Ibarrola-Jurado N, Corella D, Arós F,  
894 Gómez-Gracia E, Ruiz-Gutiérrez V, Romaguera D, Lapetra J, Lamuela-Raventós RM, Serra-  
895 Majem L, Pintó X, Basora J, Muñoz MA, Sorlí JV, Martínez-González MA. Prevention of diabetes  
896 with Mediterranean diets: a subgroup analysis of a randomized trial. *Ann Intern Med*.  
897 2014;160(1):1-10.

898 Schröder H, Fitó M, Estruch R, Martínez-González MA, Corella D, Salas-Salvadó J, et al, A  
899 short screener is valid for assessing Mediterranean diet adherence among older Spanish men  
900 and women. *J Nutr* 2011;141(6):1140-5.

901 Schulz KF, Grimes DA. Multiplicity in randomised trials II: subgroup and interim analyses.  
902 *Lancet* 2005;365(9471):1657-61.

903 Schwarzfuchs D, Golan R, Shai I. Four-year follow-up after two-year dietary interventions.  
904 *N Engl J Med* 2012; 367:1373-4.

905 Shai I, Schwarzfuchs D, Henkin Y, Shahar DR, Witkow S, Greenberg I, et al, Weight loss  
906 with a low-carbohydrate, Mediterranean, or low-fat diet. *N Engl J Med* 2008; 359:229-41.

907 Stamler J. Blood pressure and high blood pressure. Aspects of risk. *Hypertension* 1991;18(3  
908 Suppl):I95-107.

909 Stamler R. Implications of the INTERSALT study. *Hypertension* 1991;17(1Suppl):I16–20.

910 The GBD 2015 Obesity Collaborators. Health effects of overweight and obesity in 195  
911 countries over 25 years. *N Engl J Med* 2017; 377:13-27.

912 Thompson WA Jr. On the treatment of grouped observations in life studies. *Biometrics*  
913 1977;33:463-70.

914 Tuomilehto J, Lindström J, Eriksson JG, Valle TT, Hämäläinen H, Ilanne-Parikka P, Keinänen-  
915 Kiukaanniemi S, Laakso M, Louheranta A, Rastas M, Salminen V, Uusitupa M; Finnish Diabetes

916 Prevention Study Group. Prevention of type 2 diabetes mellitus by changes in lifestyle among  
917 subjects with impaired glucose tolerance. N Engl J Med. 2001;344(18):1343-50.

918 Williamson DA, Bray GA, Ryan DH. Is 5% weight loss a satisfactory criterion to define  
919 clinically significant weight loss? Obesity (Silver Spring). 2015;23(12):2319-20.

920

921
