# Supplementary material
Source: PubMed Central journal article supplement (PMC6802271)
Supplement: jama-322-1486-s003.pdf [file jama-322-1486-s003.pdf]

## Supplementary Online Content

Sayón-Orea C, Razquin C, Bulló M, et al. Effect of a nutritional and behavioral intervention on energy-reduced Mediterranean diet adherence among patients with metabolic syndrome [published October 15, 2019]. *JAMA*. doi:10.1001/jama.2019.14630

**Supplement 3.** eTable 1. Definitions of scores capturing the four dietary patterns.

eTable 2. Baseline dietary variables and their changes by randomized treatment group: Foods and foods groups.

eTable 3. Sensitivity analysis. Baseline, 6-month and 12-month changes in quality dietary scores by randomized treatment group: completers only.

eTable 4. Sensitivity analysis. Baseline, 6-month and 12-month changes in food items by randomized treatment group: completers only.

eTable 5. Sensitivity analysis. Baseline values, 6-month and 12-month changes in nutrient intake by randomized treatment group: completers only

eTable 6. Sensitivity analysis. Baseline and 6- and 12- month changes in quality dietary scores by randomized treatment group: All randomized participants. Replacing all missing values with baseline value.

eTable 7. Sensitivity analysis. Baseline values, 6-month and 12- month changes in food items by randomized treatment group: all randomized participants. Replacing all missing values with baseline value

eTable 8. Sensitivity analysis. Baseline values, 6-month and 12-month changes in nutrient intake by randomized treatment group: all randomized participants. Replacing all missing values with baseline value.

eTable 9. Baseline and 12- month change (95% confidence intervals) in risk factors, by treatment group: all randomized 245 participants (multiple imputation [MI]) and completers only.

eFigure 1. Mean values (95% CI) of scores capturing the 4 quality dietary patterns at baseline, at 6 months and at 12 months according to the randomized treatment group.

eFigure 2. Percentage of participants complying with the intended dietary changes by randomized treatment group

eFigure 3 Changes in nutritional variables (expressed in common units of baseline standard deviations) after 6 and 12 months in the control and in the intervention group.

This supplementary material has been provided by the authors to give readers additional information about their work.

**Supplemental eTable 1. Definitions of scores capturing the four dietary patterns.**

|                                | 17-item Energy-reduced Mediterranean Diet (er-MedDiet, 0-17 points)                                                                                                                                                                                                                                                                                                                                                                            | Mediterranean Diet Score (MDS, 0 to 9 points), Trichopoulou                                                                                           | Mediterranean Diet Adherence Screener (MEDAS, 0-14 points)                                                                                                                                                                                                                                                                                                                                                         | Prime Diet Quality Score (PDQS, 0-42 points)                                                                                                                                                                                                                                                                                                                                                      |
|--------------------------------|------------------------------------------------------------------------------------------------------------------------------------------------------------------------------------------------------------------------------------------------------------------------------------------------------------------------------------------------------------------------------------------------------------------------------------------------|-------------------------------------------------------------------------------------------------------------------------------------------------------|--------------------------------------------------------------------------------------------------------------------------------------------------------------------------------------------------------------------------------------------------------------------------------------------------------------------------------------------------------------------------------------------------------------------|---------------------------------------------------------------------------------------------------------------------------------------------------------------------------------------------------------------------------------------------------------------------------------------------------------------------------------------------------------------------------------------------------|
| Positively weighted components | Olive oil as main culinary fat<br>$\geq 2$ servings/d vegetables<br>$\geq 3$ servings/d fruits<br>$\geq 3$ servings/wk legumes<br>$\geq 3$ servings/wk fish<br>$\geq 3$ servings/wk nuts<br>Preference of poultry (chicken, turkey, or rabbit) over red meats (beef, pork, lamb, hamburgers, or sausages)<br>$\geq 2$ servings/wk olive oil sauce with tomato, garlic, onion, or leek (sofrito)<br>$\geq 5$ servings/wk of whole grain cereals | MUFA:SFA <sup>a</sup><br>Vegetables <sup>a</sup><br>Fruits and nuts <sup>a</sup><br>Legumes <sup>a</sup><br>Fish <sup>a</sup><br>Cereals <sup>a</sup> | Olive oil as main culinary fat<br>$\geq 4$ tbs/d olive oil<br>$\geq 2$ servings/d vegetables<br>$\geq 3$ servings/d fruits<br>$\geq 3$ servings/wk legumes<br>$\geq 3$ servings/wk fish<br>$\geq 3$ servings/wk nuts<br>Preference of poultry (chicken, turkey, or rabbit) > red meats (beef, pork, hamburgers, or sausages)<br>$\geq 2$ servings/wk olive oil sauce with tomato, garlic, onion, or leek (sofrito) | Dark leafy green vegetables <sup>c</sup><br>Cruciferous vegetables <sup>c</sup><br>Carrots <sup>c</sup><br>Other vegetables <sup>c</sup><br>Whole citrus fruits <sup>c</sup><br>Other whole fruits <sup>c</sup><br>Legumes <sup>c</sup><br>Nuts <sup>c</sup><br>Poultry <sup>c</sup><br>Fish <sup>c</sup><br>Eggs <sup>c</sup><br>Whole grains <sup>c</sup><br>Liquid vegetable oils <sup>c</sup> |
| Negatively weighted components | <1 servings/wk red or processed meats<br><1 servings/wk butter or margarine or cream<br><1 servings/wk carbonated sugar-sweetened beverages<br><3 servings/wk commercial bakery, cakes, biscuits, or pastries<br>Avoidance of any added sugar to beverages<br>$\leq 1$ serving/d of white bread<br>< 3 servings/wk of refined grain, pasta or white rice                                                                                       | Meat and meat products <sup>b</sup><br>Dairy products <sup>b</sup>                                                                                    | <1 serving/d red or processed meats<br><1 serving/d butter or margarine or cream<br><1 serving/d carbonated sugar-sweetened beverages<br><2 servings/wk commercial bakery, cakes, biscuits, or pastries                                                                                                                                                                                                            | Red meat <sup>d</sup><br>Potatoes <sup>d</sup><br>Processed meat <sup>d</sup><br>Whole fat dairy <sup>d</sup><br>Refined grains & baked goods <sup>d</sup><br>Sugar sweetened beverages <sup>d</sup><br>Fried foods obtained away from home <sup>d</sup><br>Sugary desserts and ice cream <sup>d</sup>                                                                                            |
| Alcohol                        | 2-3 glasses/d for men<br>1-2 glasses/d for women                                                                                                                                                                                                                                                                                                                                                                                               | 5-25 g/d (women)<br>10-50 g/d (men)                                                                                                                   | $\geq 7$ glasses/wk of wine                                                                                                                                                                                                                                                                                                                                                                                        |                                                                                                                                                                                                                                                                                                                                                                                                   |

<sup>a</sup> One point if the consumption was  $\geq$  the sex specific median

<sup>b</sup> One point if the consumption was  $\leq$  the sex specific median

<sup>c</sup> 0 points if the consumption was between 0–1 serving/wk; 1 point if the consumption was between 2–3 servings/wk and 2 points if the consumption was  $\geq 4$  servings/week.

<sup>d</sup> 0 points if the consumption was  $\geq 4$  servings/week; 1 point if the consumption was between 2–3 servings/wk and 2 points if the consumption was between 0–1 serving/week.

**Supplemental eTable 2. Baseline dietary variables and their changes by randomized treatment group: Foods and food groups.**

|                                        | <b>MULTIPLE IMPUTATION: ALL RANDOMIZED PARTICIPANTS</b> |                           |                                 |                |
|----------------------------------------|---------------------------------------------------------|---------------------------|---------------------------------|----------------|
| <b>Food and food groups</b>            | <b>Intervention group</b>                               | <b>Intervention group</b> | <b>Between-group difference</b> |                |
|                                        | <b>N=3,272</b>                                          | <b>N=3,311</b>            |                                 | <b>p value</b> |
| <b>Olive oil (g/week)</b>              |                                                         |                           |                                 |                |
| Baseline, median (IQR)                 | 350 (175, 350)                                          | 350 (175, 350)            |                                 |                |
| 6-month change                         | 28 (23 to 33)                                           | 32 (28 to 37)             | -4 (-11 to 2)                   | 0.20           |
| 12-month change                        | 36 (31 to 41)                                           | 44 (39 to 49)             | -8 (-15 to -2)                  | 0.02           |
| <b>Refined olive oil (g/week)</b>      |                                                         |                           |                                 |                |
| Baseline, median (IQR)                 | 0 (0, 70)                                               | 0 (0, 70)                 |                                 |                |
| 6-month change                         | -38 (-41 to -34)                                        | -34 (-38 to -31)          | -3 (-8 to 1)                    | 0.17           |
| 12-month change                        | -39 (-42 to -35)                                        | -39 (-42 to -35)          | 0 (-5 to 5)                     | 0.93           |
| <b>Extra-virgin olive oil (g/week)</b> |                                                         |                           |                                 |                |
| Baseline, median (IQR)                 | 175 (70, 350)                                           | 175 (70, 350)             |                                 |                |
| 6-month change                         | 65 (59 to 70)                                           | 66 (61 to 71)             | -1 (-9 to 6)                    | 0.71           |
| 12-month change                        | 75 (69 to 80)                                           | 83 (77 to 88)             | -8 (-16 to -1)                  | 0.04           |
| <b>Nuts (g/week)</b>                   |                                                         |                           |                                 |                |
| Baseline, median (IQR)                 | 60 (28, 165)                                            | 60 (14, 165)              |                                 |                |
| 6-month change                         | 120 (114 to 126)                                        | 72 (66 to 77)             | 49 (41 to 57)                   | <0.001         |
| 12-month change                        | 117 (111 to 123)                                        | 82 (76 to 87)             | 35 (27 to 43)                   | <0.001         |
| <b>Fruits (g/week)</b>                 |                                                         |                           |                                 |                |
| Baseline, median (IQR)                 | 2,287 (1,523, 3,200)                                    | 2,287 (1,494, 3,281)      |                                 |                |
| 6-month change                         | 344 (287 to 401)                                        | 158 (104 to 213)          | 186 (107 to 265)                | <0.001         |
| 12-month change                        | 430 (370 to 491)                                        | 233 (177 to 289)          | 197 (118 to 276)                | <0.001         |
| <b>Vegetables (g/week)</b>             |                                                         |                           |                                 |                |
| Baseline, median (IQR)                 | 2,168 (1,621, 2,814)                                    | 2,130 (1,596, 2,863)      |                                 |                |
| 6-month change                         | 330 (292 to 368)                                        | 142 (106 to 178)          | 188 (135 to 241)                | <0.001         |
| 12-month change                        | 347 (306 to 389)                                        | 137 (100 to 175)          | 210 (157 to 263)                | <0.001         |
| <b>Cereals (g/week)</b>                |                                                         |                           |                                 |                |
| Baseline, median (IQR)                 | 877 (627, 1432)                                         | 870 (645, 1432)           |                                 |                |
| 6-month change                         | -165 (-186 to -143)                                     | -75 (-95 to -55)          | -89 (-119 to -60)               | <0.001         |
| 12-month change                        | -205 (-227 to -183)                                     | -99 (-120 to -79)         | -106 (-135 to -77)              | <0.001         |
| <b>Whole grains (g/week)</b>           |                                                         |                           |                                 |                |
| Baseline, median (IQR)                 | 109 (0, 525)                                            | 98 (0, 525)               |                                 |                |
| 6-month change                         | 274 (254 to 293)                                        | 61 (42 to 79)             | 213 (186 to 240)                | <0.001         |
| 12-month change                        | 228 (207 to 248)                                        | 59 (40 to 78)             | 169 (142 to 196)                | <0.001         |

| <b>Refined grains (g/week)</b> |                     |                     |                     |        |
|--------------------------------|---------------------|---------------------|---------------------|--------|
| Baseline, median (IQR)         | 779 (425, 1475)     | 779 (412, 1474)     |                     |        |
| 6-month change                 | -538 (-562 to -515) | -192 (-214 to -170) | -346 (-378 to -314) | <0.001 |
| 12-month change                | -535 (-559 to -510) | -226 (-249 to -203) | -309 (-340 to -277) | <0.001 |

IQR, Interquartile range, Baseline data are median (IQR)

6-month and 12-month change are means (95% CI) calculated using mixed effect models taking into account site and intra-cluster correlations (couples) as random factors.

**Supplemental eTable 2 (cont). Baseline dietary variables and their changes by randomized treatment group. Foods and food groups.**

|                                | <b>MULTIPLE IMPUTATION: ALL RANDOMIZED PARTICIPANTS</b> |                      |                                 |                |
|--------------------------------|---------------------------------------------------------|----------------------|---------------------------------|----------------|
| <b>Food and food groups</b>    | <b>Intervention group</b>                               | <b>Control group</b> | <b>Between-group difference</b> |                |
|                                | <b>N=3,272</b>                                          | <b>N=3,311</b>       |                                 | <b>p value</b> |
| <b>Legumes (g/week)</b>        |                                                         |                      |                                 |                |
| Baseline, median (IQR)         | 120 (88, 180)                                           | 120 (88, 176)        |                                 |                |
| 6-month change                 | 37 (34 to 41)                                           | 17 (14 to 21)        | 20 (15 to 25)                   | <0.001         |
| 12-month change                | 39 (36 to 43)                                           | 18 (15 to 22)        | 21 (16 to 26)                   | <0.001         |
| <b>Fish (g/week)</b>           |                                                         |                      |                                 |                |
| Baseline, median (IQR)         | 673 (472, 918)                                          | 682 (475, 918)       |                                 |                |
| 6-month change                 | 101 (88 to 114)                                         | 41 (29 to 53)        | 59 (42 to 77)                   | <0.001         |
| 12-month change                | 105 (91 to 119)                                         | 29 (17 to 42)        | 75 (58 to 93)                   | <0.001         |
| <b>Meat (g/week)</b>           |                                                         |                      |                                 |                |
| Baseline, median (IQR)         | 993 (760, 1263)                                         | 994 (776, 1271)      |                                 |                |
| 6-month change                 | -109 (-123 to -95)                                      | -78 (-92 to -65)     | -31 (-50 to -11)                | 0.002          |
| 12-month change                | -116 (-130 to -101)                                     | -107 (-120 to -93)   | -9 (-28 to 10)                  | 0.37           |
| <b>Red meat (g/week)</b>       |                                                         |                      |                                 |                |
| Baseline, median (IQR)         | 290 (150, 497)                                          | 300 (150, 520)       |                                 |                |
| 6-month change                 | -115 (-123 to -106)                                     | -67 (-75 to -59)     | -48 (-59 to -36)                | <0.001         |
| 12-month change                | -120 (-129 to -111)                                     | -81 (-89 to -72)     | -39 (-51 to -28)                | <0.001         |
| <b>Processed meat (g/week)</b> |                                                         |                      |                                 |                |
| Baseline, median (IQR)         | 227 (143, 317)                                          | 227 (143, 322)       |                                 |                |
| 6-month change                 | -63 (-68 to -57)                                        | -45 (-50 to -39)     | -18 (-26 to -10)                | <0.001         |
| 12-month change                | -63 (-69 to -57)                                        | -52 (-57 to -46)     | -11 (-19 to -3)                 | 0.007          |
| <b>Pastries (g/week)</b>       |                                                         |                      |                                 |                |
| Baseline, median (IQR)         | 121 (42, 275)                                           | 114 (42, 261)        |                                 |                |
| 6-month change                 | -109 (-116 to -102)                                     | -49 (-56 to -42)     | -60 (-69 to -50)                | <0.001         |
| 12-month change                | -109 (-116 to -102)                                     | -60 (-67 to -53)     | -49 (-59 to -39)                | <0.001         |
| <b>Dairy (g/week)</b>          |                                                         |                      |                                 |                |
| Baseline, median (IQR)         | 2100 (1532, 2959)                                       | 2200 (1548, 3597)    |                                 |                |
| 6-month change                 | 16 (-34 to 66)                                          | -137 (-184 to -90)   | 153 (84 to 222)                 | <0.001         |
| 12-month change                | -41 (-95 to 12)                                         | -190 (-239 to -141)  | 149 (80 to 218)                 | <0.001         |
| <b>Total yogurt (g/week)</b>   |                                                         |                      |                                 |                |
| Baseline, median (IQR)         | 375 (58, 875)                                           | 375 (58, 875)        |                                 |                |
| 6-month change                 | 119 (97 to 141)                                         | 9 (-11 to 30)        | 110 (80 to 140)                 | <0.001         |
| 12-month change                | 88 (64 to 111)                                          | -4 (-25 to 17)       | 92 (62 to 122)                  | <0.001         |

|                                     |                |                 |                 |        |
|-------------------------------------|----------------|-----------------|-----------------|--------|
| <b>Fermented dairy<br/>(g/week)</b> |                |                 |                 |        |
| Baseline, median<br>(IQR)           | 550 (300, 975) | 575 (300, 1025) |                 |        |
| 6-month change                      | 97 (74 to 120) | -5 (-27 to 16)  | 102 (71 to 134) | <0.001 |
| 12-month change                     | 72 (47 to 96)  | -16 (-38 to 7)  | 87 (56 to 119)  | <0.001 |

IQR, Interquartile range. Baseline data are median (IQR)

6-month and 12-month change are means (95% CI) calculated using mixed effect models taking into account site and intra-cluster correlations (couples) as random factors.

**Supplemental eTable 2 (cont). Baseline dietary variables and their changes by randomized treatment group. Foods and food groups.**

| <b>MULTIPLE IMPUTATION: ALL RANDOMIZED PARTICIPANTS</b> |                           |                      |                                 |                |
|---------------------------------------------------------|---------------------------|----------------------|---------------------------------|----------------|
| <b>Food and food groups</b>                             | <b>Intervention group</b> | <b>Control group</b> | <b>Between-group difference</b> |                |
|                                                         | <b>N=3,272</b>            | <b>N=3,311</b>       |                                 | <b>p value</b> |
| <b>Low-fat dairy (g/week)</b>                           |                           |                      |                                 |                |
| Baseline, median (IQR)                                  | 658 (0, 1,775)            | 687 (0, 1,775)       |                                 |                |
| 6-month change                                          | 326 (279 to 373)          | 68 (23 to 113)       | 258 (193 to 323)                | <0.001         |
| 12-month change                                         | 267 (217 to 318)          | -4 (-50 to 42)       | 271 (206 to 336)                | <0.001         |
| <b>Whole-fat dairy (g/week)</b>                         |                           |                      |                                 |                |
| Baseline, median (IQR)                                  | 0 (0, 375)                | 0 (0, 375)           |                                 |                |
| 6-month change                                          | -174 (-196 to -151)       | -110 (-132 to -88)   | -63 (-95 to -32)                | <0.001         |
| 12-month change                                         | -160 (-184 to -135)       | -101 (-123 to -78)   | -59 (-91 to -27)                | <0.001         |
| <b>Total alcohol intake (g/week)</b>                    |                           |                      |                                 |                |
| Baseline, median (IQR)                                  | 32 (5, 98)                | 36 (5, 103)          |                                 |                |
| 6-month change                                          | -13 (-16 to -10)          | -6 (-9 to -3)        | -7 (-11 to -3)                  | 0.001          |
| 12-month change                                         | -12 (-15 to -9)           | -4 (-7 to -1)        | -8 (-12 to -3)                  | <0.001         |
| <b>Red wine (g/week)</b>                                |                           |                      |                                 |                |
| Baseline, median (IQR)                                  | 33 (0, 29)                | 4 (0, 29)            |                                 |                |
| 6-month change                                          | 1 (-1 to 3)               | 2 (0 to 4)           | -1 (-4 to 1)                    | 0.36           |
| 12-month change                                         | 2 (0 to 4)                | 3 (1 to 5)           | -1 (-4 to 1)                    | 0.37           |

IQR, Interquartile range

Baseline data are median (IQR)

6-month and 12-month change are means (95% CI) calculated using mixed effect models taking into account site and intra-cluster correlations (couples) as random factors.





**Supplemental eTable 3. Sensitivity analysis. Baseline, 6-month and 12-month changes in quality dietary scores by randomized treatment group: completers only.**

| Variable                             | COMPLETERS ONLY                   |                                   |                          |         |
|--------------------------------------|-----------------------------------|-----------------------------------|--------------------------|---------|
|                                      | Intervention group                | Control group                     | Between-group difference |         |
|                                      | n=2,862 (6 mo)<br>n=2,833 (12 mo) | n=2,883 (6 mo)<br>n=2,943 (12 mo) |                          | p value |
| <b>17-item er-MedDiet (0 to 17)*</b> |                                   |                                   |                          |         |
| Baseline, mean (SD)                  | 8.5 (2.6)                         | 8.6 (2.7)                         |                          |         |
| 6-month change                       | 4.1 (4.0 to 4.2)                  | 1.8 (1.7 to 1.9)                  | 2.3 (2.2 to 2.5)         | <0.001  |
| 12-month change                      | 4.3 (4.2 to 4.4)                  | 2.0 (1.9 to 2.1)                  | 2.3 (2.1 to 2.4)         | <0.001  |
| <b>MDS (Trichopolou 0 to 9)</b>      |                                   |                                   |                          |         |
| Baseline, mean (SD)                  | 4.3 (1.7)                         | 4.3 (1.6)                         |                          |         |
| 6-month change                       | 0.2 (0.1 to 0.2)                  | -0.3 (-0.4 to -0.3)               | 0.5 (0.4 to 0.6)         | <0.001  |
| 12-month change                      | 0.2 (0.1 to 0.2)                  | -0.3 (-0.4 to -0.3)               | 0.5 (0.4 to 0.6)         | <0.001  |
| <b>MEDAS (0 to 14)</b>               |                                   |                                   |                          |         |
| Baseline, mean (SD)                  | 7.6 (1.9)                         | 7.6 (1.9)                         |                          |         |
| 6-month change                       | 2.5 (2.5 to 2.6)                  | 1.4 (1.3 to 1.5)                  | 1.1 (1.0 to 1.3)         | <0.001  |
| 12-month change                      | 2.7 (2.7 to 2.8)                  | 1.6 (1.6 to 1.7)                  | 1.1 (1.0 to 1.2)         | <0.001  |
| <b>PDQS (0 to 42)</b>                |                                   |                                   |                          |         |
| Baseline, mean (SD)                  | 21.0 (3.7)                        | 21.0 (3.7)                        |                          |         |
| 6-month change                       | 4.6 (4.5 to 4.8)                  | 2.3 (2.1 to 2.4)                  | 2.4 (2.2 to 2.6)         | <0.001  |
| 12-month change                      | 4.7 (4.5 to 4.8)                  | 2.4 (2.3 to 2.5)                  | 2.3 (2.1 to 2.5)         | <0.001  |

Baseline data are means (SD). 6-month and 12-month change are means (95% CI) calculated using mixed effect models incorporating site and intra-cluster correlations (couples) as random factors. er-MedDiet, Energy reduced Mediterranean Diet; MDS, Mediterranean Diet Score; MEDAS, Mediterranean Diet Adherence Screener; PDQS, Prime Diet Quality Score. The direction of all 4 food patterns is the same: a higher score means a higher quality of the overall dietary pattern. The possible ranges were 0-17 for er-MedDiet, 0-9 for the MDS, 0-14 for MEDAS, and 0-42 for PDQS.

The minimum *clinically important difference (MCID)* can be considered **1 point for the MDS**, because a 2 point increment (roughly corresponding to one standard deviation) was associated in the fully adjusted model with a 25% relative reduction in all-cause mortality (Trichopoulou et al. N Engl J Med 2003;348:2599-608, Table 4), coefficient =  $\log(0.75) = -0.2877$ . Therefore, 1 point in the MDS (corresponding to 0.5 SD) will lead to a 13% relative risk reduction corresponding to a hazard ratio of 0.87, namely  $\exp(-0.2877/2) = 0.87$ , which can be considered higher than a minimal clinically significant effect from the subjective point of view of a patient.

For the MEDAS, in the PREDIMED trial, assessed as an observational study, and controlling for potential confounding, 1-point increment was associated with a 10% reduction in the risk of the composite primary cardiovascular end-point (multivariable-adjusted hazard ratio= 0.90, 95% CI, 0.85-0.96) and with a 6% reduction in total mortality (multivariable-adjusted hazard ratio= 0.94, 95% CI, 0.89-0.99) (unpublished data). Therefore, 1 point should represent a sufficiently important difference for an individual patient.

The 17-item er-MedDiet score basically captures the 14-items of MEDAS with some additions (sufficiently explained in our main manuscript) that have been repeatedly associated with benefits in previous observational studies with good control for confounding. Therefore, a 1-point difference can be also accepted as a minimum clinically important difference.

For the PDQS (range 0 to 42, SD=3.7), the minimum clinically important difference will represent probably a 2-point increment, given its wider range.

\*The number of participants included in this analysis was: for the intervention group at 6 months n=3,030 and at 12 months n=2,971 and for the control group at 6 months n=3,090 and at 12 months n=3,095

**Supplemental eTable 4. Sensitivity analysis. Baseline, 6-month and 12-month changes in food items by randomized treatment group: completers only.**

| Variable                               | COMPLETERS ONLY                   |                                   |                          |         |
|----------------------------------------|-----------------------------------|-----------------------------------|--------------------------|---------|
|                                        | Intervention group                | Control group                     | Between-group difference |         |
|                                        | n=2,862 (6 mo)<br>n=2,833 (12 mo) | n=2,883 (6 mo)<br>n=2,943 (12 mo) |                          | p value |
| <b>Total olive oil (g/week)</b>        |                                   |                                   |                          |         |
| Baseline, mean (SD)                    | 350 (175, 350)                    | 350 (175, 350)                    |                          |         |
| 6-month change                         | 26 (22 to 31)                     | 29 (25 to 34)                     | -3 (-10 to 3)            | 0.34    |
| 12-month change                        | 34 (30 to 39)                     | 42 (38 to 47)                     | -8 (-15 to -1)           | 0.02    |
| <b>Refined olive oil (g/week)</b>      |                                   |                                   |                          |         |
| Baseline, median (IQR)                 | 0 (0, 70)                         | 0 (0, 70)                         |                          |         |
| 6-month change                         | -37 (-41 to -33)                  | -34 (-38 to -31)                  | -3 (-8 to 3)             | 0.32    |
| 12-month change                        | -39 (-43 to -35)                  | -39 (-43 to -35)                  | 0 (-6 to 5)              | 0.95    |
| <b>Extra virgin olive oil (g/week)</b> |                                   |                                   |                          |         |
| Baseline, median (IQR)                 | 175 (70, 350)                     | 175 (70, 350)                     |                          |         |
| 6-month change                         | 63 (57 to 68)                     | 63 (58 to 69)                     | 0 (-8 to 7)              | 0.90    |
| 12-month change                        | 73 (68 to 79)                     | 81 (76 to 87)                     | -8 (-16 to 0)            | 0.05    |
| <b>Nuts (g/week)</b>                   |                                   |                                   |                          |         |
| Baseline, median (IQR)                 | 60 (28, 165)                      | 60 (14, 165)                      |                          |         |
| 6-month change                         | 120 (115 to 126)                  | 71 (65 to 76)                     | 50 (42 to 57)            | <0.001  |
| 12-month change                        | 117 (111 to 123)                  | 82 (77 to 88)                     | 35 (27 to 43)            | <0.001  |
| <b>Fruits (g/week)</b>                 |                                   |                                   |                          |         |
| Baseline, median (IQR)                 | 2287 (1523, 3200)                 | 2287 (1494, 3281)                 |                          |         |
| 6-month change                         | 349 (292 to 406)                  | 165 (108 to 222)                  | 184 (104 to 265)         | <0.001  |
| 12-month change                        | 435 (379 to 491)                  | 244 (188 to 299)                  | 192 (113 to 270)         | <0.001  |
| <b>Vegetables (g/week)</b>             |                                   |                                   |                          |         |
| Baseline, median (IQR)                 | 2173 (1640, 2811)                 | 2135 (1607, 2886)                 |                          |         |
| 6-month change                         | 330 (291 to 368)                  | 136 (98 to 174)                   | 193 (139 to 247)         | <0.001  |
| 12-month change                        | 350 (311 to 388)                  | 141 (103 to 179)                  | 209 (155 to 263)         | <0.001  |
| <b>Cereals (g/week)</b>                |                                   |                                   |                          |         |
| Baseline, median (IQR)                 | 885 (641, 1432)                   | 877 (645, 1432)                   |                          |         |

|                 |                     |                    |                    |        |
|-----------------|---------------------|--------------------|--------------------|--------|
| 6-month change  | -172 (-194 to -151) | -80 (-102 to -59)  | -92 (-122 to -61)  | <0.001 |
| 12-month change | -212 (-233 to -190) | -106 (-127 to -84) | -106 (-136 to -75) | <0.001 |

IQR, Interquartile range

Baseline data are median (IQR)

6-month and 12-month change are means (95% CI) calculated using mixed effect models taking into account site and intra-cluster correlations (couples) as random factors.

**Supplemental eTable 4 cont. Sensitivity analysis. Baseline, 6-month and 12-month changes in food items by randomized treatment group: completers only.**

| Variable                       | COMPLETERS ONLY                                         |                                                    |                                     |        |
|--------------------------------|---------------------------------------------------------|----------------------------------------------------|-------------------------------------|--------|
|                                | Intervention group<br>n=2,862 (6 mo)<br>n=2,833 (12 mo) | Control group<br>n=2,883 (6 mo)<br>n=2,943 (12 mo) | Between-group difference<br>p value |        |
| <b>Whole grains (g/week)</b>   |                                                         |                                                    |                                     |        |
| Baseline, median (IQR)         | 109 (0, 525)                                            | 98 (0, 525)                                        |                                     |        |
| 6-month change                 | 277 (257 to 296)                                        | 61 (42 to 81)                                      | 215 (188 to 242)                    | <0.001 |
| 12-month change                | 231 (211 to 250)                                        | 61 (42 to 80)                                      | 170 (143 to 197)                    | <0.001 |
| <b>Refined grains (g/week)</b> |                                                         |                                                    |                                     |        |
| Baseline, median (IQR)         | 779 (425, 1475)                                         | 779 (412, 1474)                                    |                                     |        |
| 6-month change                 | -544 (-568 to -519)                                     | -198 (-222 to -174)                                | -346 (-380 to -311)                 | <0.001 |
| 12-month change                | -539 (-563 to -514)                                     | -227 (-252 to -203)                                | -311 (-346 to -277)                 | <0.001 |
| <b>Legumes (g/week)</b>        |                                                         |                                                    |                                     |        |
| Baseline, median (IQR)         | 120 (88, 180)                                           | 120 (88, 176)                                      |                                     |        |
| 6-month change                 | 38 (35 to 42)                                           | 18 (14 to 21)                                      | 20 (16 to 25)                       | <0.001 |
| 12-month change                | 40 (37 to 43)                                           | 19 (16 to 23)                                      | 21 (16 to 25)                       | <0.001 |
| <b>Fish (g/week)</b>           |                                                         |                                                    |                                     |        |
| Baseline, median (IQR)         | 673 (472, 918)                                          | 682 (475, 918)                                     |                                     |        |
| 6-month change                 | 101 (88 to 113)                                         | 40 (28 to 53)                                      | 60 (43 to 78)                       | <0.001 |
| 12-month change                | 104 (91 to 117)                                         | 31 (18 to 44)                                      | 73 (55 to 91)                       | <0.001 |
| <b>Meat (g/week)</b>           |                                                         |                                                    |                                     |        |
| Baseline, median (IQR)         | 993 (760, 1263)                                         | 994 (776, 1271)                                    |                                     |        |
| 6-month change                 | -110 (-123 to -96)                                      | -81 (-94 to -67)                                   | -29 (-48 to -10)                    | 0.003  |
| 12-month change                | -118 (-133 to -104)                                     | -107 (-121 to -93)                                 | -11 (-31 to 9)                      | 0.27   |
| <b>Red meat (g/week)</b>       |                                                         |                                                    |                                     |        |
| Baseline, median (IQR)         | 290 (150, 497)                                          | 300 (150, 520)                                     |                                     |        |
| 6-month change                 | -114 (-122 to -106)                                     | -67 (-75 to -59)                                   | -47 (-59 to -35)                    | <0.001 |
| 12-month change                | -120 (-129 to -112)                                     | -80 (-89 to -71)                                   | -40 (-53 to -28)                    | <0.001 |
| <b>Processed meat (g/week)</b> |                                                         |                                                    |                                     |        |

|                          |                     |                  |                  |        |
|--------------------------|---------------------|------------------|------------------|--------|
| Baseline, median (IQR)   | 227 (143, 317)      | 227 (143, 322)   |                  |        |
| 6-month change           | -63 (-69 to -57)    | -45 (-51 to -39) | -18 (-26 to -9)  | <0.001 |
| 12-month change          | -64 (-70 to -58)    | -52 (-58 to -46) | -11 (-20 to -3)  | 0.01   |
| <b>Pastries (g/week)</b> |                     |                  |                  |        |
| Baseline, median (IQR)   | 121 (42, 275)       | 114 (42, 261)    |                  |        |
| 6-month change           | -109 (-116 to -101) | -49 (-57 to -42) | -59 (-70 to -49) | <0.001 |
| 12-month change          | -109 (-116 to -101) | -60 (-67 to -52) | -49 (-60 to -39) | <0.001 |

IQR, Interquartile range

Baseline data are median (IQR)

6-month and 12-month change are means (95% CI) calculated using mixed effect models taking into account site and intra-cluster correlations (couples) as random factors.

**Supplemental eTable 4 cont. Sensitivity analysis. Baseline and 6- and 12- month changes in food items by randomized treatment group: completers only.**

| Variable                             | COMPLETERS ONLY                   |                                   |                          |         |
|--------------------------------------|-----------------------------------|-----------------------------------|--------------------------|---------|
|                                      | Intervention group                | Control group                     | Between-group difference |         |
|                                      | n=2,862 (6 mo)<br>n=2,833 (12 mo) | n=2,883 (6 mo)<br>n=2,943 (12 mo) |                          | p value |
| <b>Dairy (g/week)</b>                |                                   |                                   |                          |         |
| Baseline, median (IQR)               | 2,100 (1,532, 2,959)              | 2,200 (1,548, 3,597)              |                          |         |
| 6-month change                       | 17 (-33 to 67)                    | -143 (-192 to -93)                | 159 (89 to 230)          | <0.001  |
| 12-month change                      | -39 (-88 to 11)                   | -186 (-235 to -137)               | 148 (78 to 218)          | <0.001  |
| <b>Total yogurt (g/week)</b>         |                                   |                                   |                          |         |
| Baseline, median (IQR)               | 375 (58, 875)                     | 375 (58, 875)                     |                          |         |
| 6-month change                       | 119 (98 to 140)                   | 6 (-15 to 27)                     | 113 (83 to 143)          | <0.001  |
| 12-month change                      | 87 (66 to 109)                    | -4 (-25 to 17)                    | 91 (61 to 121)           | <0.001  |
| <b>Fermented dairy (g/week)</b>      |                                   |                                   |                          |         |
| Baseline, median (IQR)               | 550 (300, 975)                    | 575 (300, 1,025)                  |                          |         |
| 6-month change                       | 97 (75 to 119)                    | -9 (-31 to 14)                    | 105 (74 to 137)          | <0.001  |
| 12-month change                      | 72 (49 to 94)                     | -15 (-37 to 7)                    | 86 (55 to 118)           | <0.001  |
| <b>Low-fat dairy (g/week)</b>        |                                   |                                   |                          |         |
| Baseline, median (IQR)               | 658 (0, 1,775)                    | 687 (0, 1,775)                    |                          |         |
| 6-month change                       | 327 (280 to 373)                  | 62 (15 to 108)                    | 265 (199 to 331)         | <0.001  |
| 12-month change                      | 270 (223 to 317)                  | -1 (-47 to 45)                    | 271 (206 to 337)         | <0.001  |
| <b>Whole-fat dairy (g/week)</b>      |                                   |                                   |                          |         |
| Baseline, median (IQR)               | 0 (0, 375)                        | 0 (0, 375)                        |                          |         |
| 6-month change                       | -173 (-197 to -149)               | -111 (-135 to -87)                | -61 (-95 to -27)         | 0.001   |
| 12-month change                      | -159 (-183 to -134)               | -99 (-124 to -75)                 | -59 (-94 to -25)         | 0.001   |
| <b>Total alcohol intake (g/week)</b> |                                   |                                   |                          |         |
| Baseline, median (IQR)               | 32 (5, 98)                        | 36 (5, 103)                       |                          |         |

|                          |                  |               |                |        |
|--------------------------|------------------|---------------|----------------|--------|
| 6-month change           | -13 (-16 to -10) | -6 (-9 to -3) | -7 (-11 to -3) | <0.001 |
| 12-month change          | -12 (-15 to -9)  | -4 (-7 to -1) | -8 (-12 to -3) | <0.001 |
| <b>Red wine (g/week)</b> |                  |               |                |        |
| Baseline, median (IQR)   | 4 (0, 29)        | 4 (0, 29)     |                |        |
| 6-month change           | 1 (-1 to 3)      | 2 (0 to 4)    | -1 (-4 to 2)   | 0.38   |
| 12-month change          | 2 (0 to 4)       | 3 (1 to 5)    | -1 (-4 to 2)   | 0.40   |

IQR, Interquartile range

Baseline data are median (IQR)

6-month and 12-month change are means (95% CI) calculated using mixed effect models taking into account site and intra-cluster correlations (couples) as random factors.

**Supplemental eTable 5. Sensitivity analysis. Baseline values, 6-month and 12-month changes in nutrient intake by randomized treatment group: completers only.**

| Variable                            | COMPLETERS ONLY                   |                                   |                          |         |
|-------------------------------------|-----------------------------------|-----------------------------------|--------------------------|---------|
|                                     | Intervention group                | Control group                     | Between-group difference |         |
|                                     | n=2,862 (6 mo)<br>n=2,833 (12 mo) | n=2,883 (6 mo)<br>n=2,943 (12 mo) |                          | p value |
| <b>Total energy Intake (kcal/d)</b> |                                   |                                   |                          |         |
| Baseline, mean (SD)                 | 2,355 (544)                       | 2,369 (555)                       |                          |         |
| 6-month change                      | -173 (-192 to -154)               | -78 (-97 to -59)                  | -95 (-122 to -68)        | <0.001  |
| 12-month change                     | -176 (-196 to -157)               | -74(-93to -54)                    | -103 (-130to -75)        | <0.001  |
| <b>Total protein (%E)</b>           |                                   |                                   |                          |         |
| Baseline, mean (SD)                 | 16.8 (2.8)                        | 16.8 (2.8)                        |                          |         |
| 6-month change                      | 1.2 (1.1 to 1.3)                  | 0.2 (0.1 to 0.3)                  | 1.0 (0.9 to 1.2)         | <0.001  |
| 12-month change                     | 1.1 (1.0 to 1.2)                  | 0 (-.1 to .1)                     | 1.1 (1.0 to 1.2)         | <0.001  |
| <b>Total carbohydrate (%E)</b>      |                                   |                                   |                          |         |
| Baseline, mean (SD)                 | 40.7 (6.8)                        | 40.4 (6.9)                        |                          |         |
| 6-month change                      | -3.3 (-3.6 to -3.1)               | -1.8 (-2.1 to -1.6)               | -1.5 (-1.9 to -1.2)      | <0.001  |
| 12-month change                     | -3.7 (-3.9 to -3.4)               | -2.3 (-2.5 to -2.0)               | -1.4 (-1.8 to -1.1)      | <0.001  |
| <b>Total fat (%E)</b>               |                                   |                                   |                          |         |
| Baseline, mean (SD)                 | 39.5 (6.6)                        | 39.7 (6.5)                        |                          |         |
| 6-month change                      | 2.5 (2.2 to 2.7)                  | 1.8 (1.5 to 2.0)                  | 0.7 (0.3 to 1.0)         | <0.001  |
| 12-month change                     | 2.9 (2.6 to 3.1)                  | 2.3 (2.1 to 2.6)                  | 0.5 (0.2 to 0.9)         | 0.004   |
| <b>SFA (%E)</b>                     |                                   |                                   |                          |         |
| Baseline, mean (SD)                 | 9.9 (2.0)                         | 10.0 (2.0)                        |                          |         |
| 6-month change                      | -1.0 (-1.1 to -0.9)               | -0.6 (-0.6 to -0.5)               | -0.4 (-0.6 to -0.3)      | <0.001  |
| 12-month change                     | -0.9 (-1.0 to -0.9)               | -0.6 (-0.7 to -0.5)               | -0.4 (-0.5 to -0.3)      | <0.001  |
| <b>MUFA (%E)</b>                    |                                   |                                   |                          |         |
| Baseline, mean (SD)                 | 20.5 (4.7)                        | 20.6 (4.6)                        |                          |         |
| 6-month change                      | 3.5 (3.3 to 3.7)                  | 2.3 (2.1 to 2.5)                  | 1.2 (0.9 to 1.4)         | <0.001  |
| 12-month change                     | 3.9 (3.7 to 4.1)                  | 3.0 (2.8 to 3.2)                  | 0.9 (0.6 to 1.2)         | <0.001  |

Baseline data are means (SD)

E, energy; SFA, saturated fatty acids; MUFA, monounsaturated fatty acids

6-month and 12-month change are means (95% CI) calculated using mixed effect models taking into account site and intra-cluster correlations (couples) as random factors.

**Supplemental eTable 5 cont. Sensitivity analysis. Baseline values, 6-month and 12-month changes in nutrient intake by randomized treatment group: completers only.**

| Variable                                   | COMPLETERS ONLY                   |                                   |                          |         |
|--------------------------------------------|-----------------------------------|-----------------------------------|--------------------------|---------|
|                                            | Intervention group                | Control group                     | Between-group difference |         |
|                                            | n=2,862 (6 mo)<br>n=2,833 (12 mo) | n=2,883 (6 mo)<br>n=2,943 (12 mo) |                          | p value |
| <b>Ratio MUFA:SFA</b>                      |                                   |                                   |                          |         |
| Baseline, mean (SD)                        | 2.1 (0.5)                         | 2.1 (0.5)                         |                          |         |
| 6-month change                             | 0.6 (0.6 to 0.7)                  | 0.4 (0.4 to 0.4)                  | 0.3 (0.2 to 0.3)         | <0.001  |
| 12-month change                            | 0.7 (0.6 to 0.7)                  | 0.5 (0.4 to 0.5)                  | 0.2 (0.2 to 0.2)         | <0.001  |
| <b>PUFA (%E)</b>                           |                                   |                                   |                          |         |
| Baseline, mean (SD)                        | 6.4 (1.9)                         | 6.4 (1.8)                         |                          |         |
| 6-month change                             | 1.3 (1.2 to 1.4)                  | 0.8 (0.7 to 0.8)                  | 0.5 (0.4 to 0.6)         | <0.001  |
| 12-month change                            | 1.3 (1.2 to 1.3)                  | 0.8 (0.8 to 0.9)                  | 0.4 (0.3 to 0.5)         | <0.001  |
| <b>Total alcohol (%E)</b>                  |                                   |                                   |                          |         |
| Baseline, median (IQR)                     | 1 (0, 4)                          | 2 (0, 4)                          |                          |         |
| 6-month change                             | -0.3 (-0.4 to -0.2)               | -0.1 (-0.2 to 0)                  | -0.2 (-0.4 to 0)         | 0.02    |
| 12-month change                            | -0.3 (-0.4 to -0.1)               | 0 (-0.1 to 0.1)                   | -0.3 (-0.4 to -0.1)      | 0.01    |
| <b>Fiber (g/week)</b>                      |                                   |                                   |                          |         |
| Baseline, mean (SD)                        | 184 (63)                          | 182 (60)                          |                          |         |
| 6-month change                             | 40 (37 to 42)                     | 16 (14 to 19)                     | 24 (20 to 27)            | <0.001  |
| 12-month change                            | 37 (35 to 40)                     | 18 (16 to 21)                     | 19 (16 to 22)            | <0.001  |
| <b>Long chain w-3 fatty acids (g/week)</b> |                                   |                                   |                          |         |
| Baseline, median (IQR)                     | 5 (4, 9)                          | 5 (4, 9)                          |                          |         |
| 6-month change                             | 1.1 (0.9 to 1.2)                  | 0.4 (0.3 to 0.6)                  | 0.7 (0.5 to 0.8)         | <0.001  |
| 12-month change                            | 1.1 (1.0 to 1.2)                  | 0.4 (0.3 to 0.6)                  | 0.7 (0.5 to 0.9)         | <0.001  |
| <b>Cholesterol (mg/week)</b>               |                                   |                                   |                          |         |
| Baseline, mean (SD)                        | 2,651 (793)                       | 2,682 (794)                       |                          |         |
| 6-month change                             | -222 (-250 to -194)               | -169 (-197 to -141)               | -53 (-93 to -13)         | 0.009   |
| 12-month change                            | -218 (-247 to -189)               | -206 (-235 to -178)               | -12 (-52 to 29)          | 0.58    |
| <b>Sodium (g/week)</b>                     |                                   |                                   |                          |         |
| Baseline, median (IQR)                     | 22.2 (17.9, 27.1)                 | 22.2 (17.9, 27.4)                 |                          |         |
| 6-month change                             | -3.1 (-3.3 to -2.8)               | -1.9 (-2.1 to -1.6)               | -1.2 (-1.5 to -0.9)      | <0.001  |
| 12-month change                            | -3.2 (-3.5 to -3.0)               | -1.9 (-2.1 to -1.6)               | -1.3 (-1.7 to -1.0)      | <0.001  |

Baseline data are means (SD) or median (IQR)

E, energy; SFA, saturated fatty acids; MUFA, monounsaturated fatty acids; PUFA, polyunsaturated fatty acids;

w-3, omega-3

6-month and 12-month change are means (95% CI) calculated using mixed effect models taking into account site and intra-cluster correlations (couples) as random factors.

**Supplemental eTable 6. Sensitivity analysis. Baseline and 6- and 12- month changes in quality dietary scores by randomized treatment group: All randomized participants. Replacing all missing values with baseline value.**

| <b>REPLACING ALL MISSING VALUES WITH BASELINE VALUE</b> |                    |                     |                          |         |
|---------------------------------------------------------|--------------------|---------------------|--------------------------|---------|
| Variable                                                | Intervention group | Control group       | Between-group difference |         |
|                                                         | n=3,272            | n=3,311             |                          | p value |
| <b>17-item er-MedDiet (0 to 17)</b>                     |                    |                     |                          |         |
| Baseline, mean (SD)                                     | 8.5 (2.6)          | 8.6 (2.7)           |                          |         |
| 6-month change                                          | 3.8 (3.7 to 3.9)   | 1.7 (1.6 to 1.8)    | 2.1 (2 to 2.3)           | <0.001  |
| 12-month change                                         | 3.9 (3.8 to 4.0)   | 1.9 (1.8 to 2.0)    | 2.0 (1.9 to 2.2)         | <0.001  |
| <b>MDS (Trichopolou 0 to 9)</b>                         |                    |                     |                          |         |
| Baseline, mean (SD)                                     | 4.3 (1.7)          | 4.3 (1.6)           |                          |         |
| 6-month change                                          | 0.1 (0.1 to 0.2)   | -0.3 (-0.4 to -0.2) | 0.4 (0.3 to 0.5)         | <0.001  |
| 12-month change                                         | 0.1 (0.1 to 0.2)   | -0.3 (-0.4 to -0.3) | 0.4 (0.4 to 0.5)         | <0.001  |
| <b>MEDAS (0 to 14)</b>                                  |                    |                     |                          |         |
| Baseline, mean (SD)                                     | 7.6 (1.9)          | 7.6 (1.9)           |                          |         |
| 6-month change                                          | 2.3 (2.2 to 2.3)   | 1.3 (1.2 to 1.3)    | 1.0 (0.9 to 1.1)         | <0.001  |
| 12-month change                                         | 2.4 (2.3 to 2.5)   | 1.5 (1.4 to 1.6)    | 0.9 (0.8 to 1.0)         | <0.001  |
| <b>PDQS (0 to 42)</b>                                   |                    |                     |                          |         |
| Baseline, mean (SD)                                     | 21.0 (3.7)         | 21.0 (3.7)          |                          |         |
| 6-month change                                          | 4.0 (3.9 to 4.2)   | 2.0 (1.8 to 2.1)    | 2.1 (1.9 to 2.3)         | <0.001  |
| 12-month change                                         | 4.0 (3.9 to 4.2)   | 2.1 (2.0 to 2.3)    | 1.9 (1.7 to 2.1)         | <0.001  |

Baseline data are means (SD)

6-month and 12-month change are means (95% CI) calculated using mixed effect models taking into account site and intra-cluster correlations (couples) as random factors.

er-MedDiet, Energy reduced Mediterranean Diet; MDS, Mediterranean Diet Score, MEDAS, Mediterranean Diet Adherence Screener; PDQS, Prime Diet Quality Score



**Supplemental eTable 7. Sensitivity analysis. Baseline values, 6-month and 12-month changes in food items by randomized treatment group: all randomized participants. Replacing all missing values with baseline value.**

| <b>REPLACING ALL MISSING VALUES WITH BASELINE VALUE</b> |                      |                      |                          |         |
|---------------------------------------------------------|----------------------|----------------------|--------------------------|---------|
| Variable                                                | Intervention group   | Control group        | Between-group difference |         |
|                                                         | n=3,272              | n=3,311              |                          | p value |
| <b>Olive oil (g/week)</b>                               |                      |                      |                          |         |
| Baseline, median (IQR)                                  | 350 (175, 350)       | 350 (175, 350)       |                          |         |
| 6-month change                                          | 23 (18 to 27)        | 26 (22 to 30)        | -3 (-9 to 3)             | 0.27    |
| 12-month change                                         | 30 (26 to 34)        | 38 (34 to 42)        | -7 (-13 to -2)           | 0.01    |
| <b>Refined olive oil (g/week)</b>                       |                      |                      |                          |         |
| Baseline, median (IQR)                                  | 0 (0, 70)            | 0 (0, 70)            |                          |         |
| 6-month change                                          | -32 (-35 to -29)     | -31 (-34 to -28)     | -1 (-5 to 4)             | 0.72    |
| 12-month change                                         | -33 (-36 to -29)     | -35 (-38 to -32)     | 3 (-2 to 7)              | 0.26    |
| <b>EVOO (g/week)</b>                                    |                      |                      |                          |         |
| Baseline, median (IQR)                                  | 175 (70, 350)        | 175 (70, 350)        |                          |         |
| 6-month change                                          | 54 (49 to 59)        | 56 (51 to 61)        | -3 (-9 to 4)             | 0.47    |
| 12-month change                                         | 63 (58 to 68)        | 73 (68 to 78)        | -10 (-17 to -3)          | 0.004   |
| <b>Nuts (g/week)</b>                                    |                      |                      |                          |         |
| Baseline, median (IQR)                                  | 60 (28, 165)         | 60 (14, 165)         |                          |         |
| 6-month change                                          | 105 (100 to 110)     | 61 (56 to 67)        | 43 (36 to 51)            | <0.001  |
| 12-month change                                         | 100 (95 to 106)      | 73 (68 to 78)        | 28 (20 to 35)            | <0.001  |
| <b>Fruits (g/week)</b>                                  |                      |                      |                          |         |
| Baseline, median (IQR)                                  | 2,287 (1,523, 3,200) | 2,287 (1,494, 3,281) |                          |         |
| 6-month change                                          | 306 (256 to 356)     | 144 (94 to 193)      | 162 (92 to 233)          | <0.001  |
| 12-month change                                         | 369 (319 to 419)     | 215 (166 to 265)     | 154 (83 to 224)          | <0.001  |
| <b>Vegetables (g/week)</b>                              |                      |                      |                          |         |
| Baseline, median (IQR)                                  | 2,168 (1,621, 2,814) | 2,130 (1,596, 2,863) |                          |         |
| 6-month change                                          | 287 (254 to 321)     | 116 (83 to 149)      | 171 (124 to 218)         | <0.001  |
| 12-month change                                         | 295 (261 to 328)     | 126 (93 to 159)      | 169 (121 to 216)         | <0.001  |
| <b>Cereals (g/week)</b>                                 |                      |                      |                          |         |
| Baseline, median (IQR)                                  | 877 (627, 1,432)     | 870 (645, 1,432)     |                          |         |
| 6-month change                                          | -152 (-170 to -133)  | -70 (-89 to -51)     | -82 (-108 to -55)        | <0.001  |
| 12-month change                                         | -183 (-202 to -165)  | -87 (-106 to -68)    | -96 (-123 to -70)        | <0.001  |

IQR, Interquartile range

Baseline data are median (IQR)

6-month and 12-month change are means (95% CI) calculated using mixed effect models taking into account site and intra-cluster correlations (couples) as random factors.

**Supplemental eTable 7 cont. Sensitivity analysis. Baseline, 6-month and 12-month changes in food items by randomized treatment group: all randomized participants. Replacing all missing values with baseline value.**

| <b>REPLACING ALL MISSING VALUES WITH BASELINE VALUE</b> |                           |                      |                                 |                |
|---------------------------------------------------------|---------------------------|----------------------|---------------------------------|----------------|
| <b>Variable</b>                                         | <b>Intervention group</b> | <b>Control group</b> | <b>Between-group difference</b> |                |
|                                                         | <b>n=3,272</b>            | <b>n=3,311</b>       |                                 | <b>p value</b> |
| <b>Whole grains (g/week)</b>                            |                           |                      |                                 |                |
| Baseline, median (IQR)                                  | 109 (0, 525)              | 98 (0, 525)          |                                 |                |
| 6-month change                                          | 238 (221 to 255)          | 54 (37 to 70)        | 184 (160 to 208)                | <0.001         |
| 12-month change                                         | 197 (180 to 214)          | 56 (39 to 73)        | 141 (117 to 165)                | <0.001         |
| <b>Refined grains (g/week)</b>                          |                           |                      |                                 |                |
| Baseline, median (IQR)                                  | 779 (425, 1,475)          | 779 (412, 1,474)     |                                 |                |
| 6-month change                                          | -475 (-496 to -454)       | -172 (-193 to -152)  | -303 (-332 to -273)             | <0.001         |
| 12-month change                                         | -467 (-488 to -446)       | -203 (-224 to -182)  | -264 (-294 to -235)             | <0.001         |
| <b>Legumes (g/week)</b>                                 |                           |                      |                                 |                |
| Baseline, median (IQR)                                  | 120 (88, 180)             | 120 (88, 176)        |                                 |                |
| 6-month change                                          | 33 (30 to 36)             | 14 (11 to 17)        | 19 (15 to 23)                   | <0.001         |
| 12-month change                                         | 35 (32 to 38)             | 17 (14 to 20)        | 17 (13 to 22)                   | <0.001         |
| <b>Fish (g/week)</b>                                    |                           |                      |                                 |                |
| Baseline, median (IQR)                                  | 673 (472, 918)            | 682 (475, 918)       |                                 |                |
| 6-month change                                          | 90 (79 to 101)            | 35 (23 to 46)        | 55 (40 to 71)                   | <0.001         |
| 12-month change                                         | 90 (79 to 102)            | 27 (16 to 38)        | 63 (47 to 79)                   | <0.001         |
| <b>Meat (g/week)</b>                                    |                           |                      |                                 |                |
| Baseline, median (IQR)                                  | 993 (760, 1,263)          | 994 (776, 1,271)     |                                 |                |
| 6-month change                                          | -95 (-107 to -83)         | -70 (-82 to -58)     | -25 (-42 to -8)                 | 0.01           |
| 12-month change                                         | -104 (-116 to -92)        | -95 (-107 to -83)    | -9 (-26 to 8)                   | 0.31           |
| <b>Red meat (g/week)</b>                                |                           |                      |                                 |                |
| Baseline, median (IQR)                                  | 290 (150, 497)            | 300 (150, 520)       |                                 |                |
| 6-month change                                          | -99 (-106 to -92)         | -59 (-66 to -51)     | -40 (-51 to -30)                | <0.001         |
| 12-month change                                         | -104 (-112 to -97)        | -71 (-79 to -64)     | -33 (-43 to -22)                | <0.001         |
| <b>Processed meat (g/week)</b>                          |                           |                      |                                 |                |
| Baseline, median (IQR)                                  | 227 (143, 317)            | 227 (143, 322)       |                                 |                |
| 6-month change                                          | -55 (-60 to -50)          | -38 (-43 to -33)     | -17 (-24 to -10)                | <0.001         |
| 12-month change                                         | -55 (-60 to -50)          | -47 (-52 to -42)     | -9 (-16 to -1)                  | 0.02           |
| <b>Pastries (g/week)</b>                                |                           |                      |                                 |                |
| Baseline, median (IQR)                                  | 121 (42, 275)             | 114 (42, 261)        |                                 |                |
| 6-month change                                          | -94 (-100 to -88)         | -42 (-48 to -36)     | -52 (-61 to -43)                | <0.001         |
| 12-month change                                         | -93 (-99 to -87)          | -54 (-60 to -47)     | -39 (-48 to -30)                | <0.001         |

IQR, Interquartile range

Baseline data are median and (IQR)

6-month and 12-month change are means (95% CI) calculated using mixed effect models taking into account site and intra-cluster correlations (couples) as random factors.

**Supplemental eTable 7 cont. Sensitivity analysis. Baseline values, 6-month and 12-month changes in food items by randomized treatment group: all randomized participants. Replacing all missing values with baseline value.**

| <b>REPLACING ALL MISSING VALUES WITH BASELINE VALUE</b> |                      |                      |                          |         |
|---------------------------------------------------------|----------------------|----------------------|--------------------------|---------|
| Variable                                                | Intervention group   | Control group        | Between-group difference |         |
|                                                         | n=3,272              | n=3,311              |                          | p value |
| <b>Dairy (g/week)</b>                                   |                      |                      |                          |         |
| Baseline, median (IQR)                                  | 2,100 (1,532, 2,959) | 2,200 (1,548, 3,597) |                          |         |
| 6-month change                                          | 19 (-24 to 63)       | -125 (-168 to -82)   | 144 (83 to 205)          | <0.001  |
| 12-month change                                         | -29 (-72 to 14)      | -166 (-209 to -123)  | 137 (76 to 198)          | <0.001  |
| <b>Total yogurt (g/week)</b>                            |                      |                      |                          |         |
| Baseline, median (IQR)                                  | 375 (58, 875)        | 375 (58, 875)        |                          |         |
| 6-month change                                          | 103 (84 to 122)      | 7 (-11 to 26)        | 95 (69 to 122)           | <0.001  |
| 12-month change                                         | 77 (58 to 96)        | -4 (-22 to 15)       | 81 (54 to 107)           | <0.001  |
| <b>Fermented dairy (g/week)</b>                         |                      |                      |                          |         |
| Baseline, median (IQR)                                  | 550 (300, 975)       | 575 (300, 1,025)     |                          |         |
| 6-month change                                          | 83 (64 to 103)       | -6 (-25 to 14)       | 89 (61 to 117)           | <0.001  |
| 12-month change                                         | 63 (43 to 82)        | -14 (-33 to 6)       | 76 (49 to 104)           | <0.001  |
| <b>Low-fat dairy (g/week)</b>                           |                      |                      |                          |         |
| Baseline, median (IQR)                                  | 658 (0, 1,775)       | 687 (0, 1,775)       |                          |         |
| 6-month change                                          | 283 (243 to 324)     | 56 (15 to 96)        | 228 (170 to 285)         | <0.001  |
| 12-month change                                         | 230 (189 to 271)     | -4 (-45 to 36)       | 234 (177 to 292)         | <0.001  |
| <b>Whole-fat dairy (g/week)</b>                         |                      |                      |                          |         |
| Baseline, median (IQR)                                  | 0 (0, 375)           | 0 (0, 375)           |                          |         |
| 6-month change                                          | -147 (-167 to -126)  | -98 (-118 to -77)    | -49 (-78 to -20)         | 0.001   |
| 12-month change                                         | -130 (-151 to -110)  | -87 (-107 to -67)    | -44 (-72 to -15)         | 0.003   |
| <b>Total alcohol intake (g/week)</b>                    |                      |                      |                          |         |
| Baseline, median (IQR)                                  | 32 (5, 98)           | 36 (5, 103)          |                          |         |
| 6-month change                                          | -12 (-14 to -9)      | -5 (-8 to -3)        | -6 (-10 to -3)           | 0.001   |
| 12-month change                                         | -11 (-13 to -8)      | -4 (-6 to -1)        | -7 (-10 to -3)           | <0.001  |
| <b>Red wine (g/week)</b>                                |                      |                      |                          |         |
| Baseline, median (IQR)                                  | 0 (0, 29)            | 0 (0, 29)            |                          |         |
| 6-month change                                          | 1 (-1 to 2)          | 2 (0 to 3)           | -1 (-3 to 1)             | 0.36    |
| 12-month change                                         | 1 (0 to 3)           | 2 (1 to 4)           | -1 (-3 to 1)             | 0.36    |

IQR, Interquartile range

Baseline data are median (IQR)

6-month and 12-month change are means (95% CI) calculated using mixed effect models taking into account site and intra-cluster correlations (couples) as random factors.

**Supplemental eTable 8. Sensitivity analysis. Baseline values, 6-month and 12-month changes in nutrient intake by randomized treatment group: all randomized participants. Replacing all missing values with baseline value.**

| <b>REPLACING ALL MISSING VALUES WITH BASELINE VALUE</b> |                     |                     |                          |         |
|---------------------------------------------------------|---------------------|---------------------|--------------------------|---------|
| Variable                                                | Intervention group  | Control group       | Between-group difference |         |
|                                                         | n=3,272             | n=3,311             |                          | p value |
| <b>Total energy Intake (kcal/d)</b>                     |                     |                     |                          |         |
| Baseline, mean (SD)                                     | 2,355 (544)         | 2,369 (555)         |                          |         |
| 6-month change                                          | -151 (-168 to -135) | -67 (-83 to -50)    | -85 (-108 to -61)        | <0.001  |
| 12-month change                                         | -154 (-170 to -137) | -66 (-83 to -49)    | -88 (-111 to -64)        | <0.001  |
| <b>Total protein (%E)</b>                               |                     |                     |                          |         |
| Baseline, mean (SD)                                     | 16.8 (2.8)          | 16.8 (2.8)          |                          |         |
| 6-month change                                          | 1.0 (1.0 to 1.1)    | 0.1 (0 to 0.2)      | 0.9 (0.8 to 1)           | <0.001  |
| 12-month change                                         | 0.9 (0.8 to 1.0)    | 0 (-0.1 to 0.1)     | 0.9 (0.8 to 1.1)         | <0.001  |
| <b>Total carbohydrate (%E)</b>                          |                     |                     |                          |         |
| Baseline, mean (SD)                                     | 40.7 (6.8)          | 40.4 (6.9)          |                          |         |
| 6-month change                                          | -2.9 (-3.1 to -2.7) | -1.6 (-1.8 to -1.4) | -1.3 (-1.6 to -1)        | <0.001  |
| 12-month change                                         | -3.2 (-3.4 to -3.0) | -2.0 (-2.2 to -1.8) | -1.2 (-1.5 to -0.9)      | <0.001  |
| <b>Total fat (%E)</b>                                   |                     |                     |                          |         |
| Baseline, mean (SD)                                     | 39.5 (6.6)          | 39.7 (6.5)          |                          |         |
| 6-month change                                          | 2.1 (1.9 to 2.4)    | 1.6 (1.4 to 1.8)    | 0.6 (0.3 to 0.9)         | <0.001  |
| 12-month change                                         | 2.5 (2.3 to 2.7)    | 2.1 (1.8 to 2.3)    | 0.4 (0.1 to 0.8)         | .006    |
| <b>SFA (%E)</b>                                         |                     |                     |                          |         |
| Baseline, mean (SD)                                     | 9.9 (2.0)           | 10 (2)              |                          |         |
| 6-month change                                          | -0.9 (-0.9 to -0.8) | -0.5 (-0.6 to -0.4) | -0.4 (-0.5 to -0.3)      | <0.001  |
| 12-month change                                         | -0.8 (-0.9 to -0.7) | -0.5 (-0.6 to -0.5) | -0.3 (-0.4 to -0.2)      | <0.001  |
| <b>MUFA (%E)</b>                                        |                     |                     |                          |         |
| Baseline, mean (SD)                                     | 20.5 (4.7)          | 20.6 (4.6)          |                          |         |
| 6-month change                                          | 3.0 (2.9 to 3.2)    | 2.0 (1.9 to 2.2)    | 1.0 (0.8 to 1.2)         | <0.001  |
| 12-month change                                         | 3.4 (3.2 to 3.5)    | 2.6 (2.5 to 2.8)    | 0.7 (0.5 to 1.0)         | <0.001  |

E, energy; SFA, saturated fatty acids; MUFA, monounsaturated fatty acids

Baseline data are means (SD)

6-month and 12-month change are means (95% CI) calculated using mixed effect models taking into account site and intra-cluster correlations (couples) as random factors.

**Supplemental eTable 8 cont. Sensitivity analysis. Baseline values, 6-month and 12-month changes in nutrient intake by randomized treatment group: all randomized participants. Replacing all missing values with baseline value.**

| <b>REPLACING ALL MISSING VALUES WITH BASELINE VALUE</b> |                     |                     |                          |         |
|---------------------------------------------------------|---------------------|---------------------|--------------------------|---------|
| Variable                                                | Intervention group  | Control group       | Between-group difference |         |
|                                                         | n=3,272             | n=3,311             |                          | p value |
| <b>Ratio MUFA:SFA</b>                                   |                     |                     |                          |         |
| Baseline, mean (SD)                                     | 2.1 (0.5)           | 2.1 (0.5)           |                          |         |
| 6-month change                                          | 0.6 (0.5 to 0.6)    | 0.3 (0.3 to 0.4)    | 0.2 (0.2 to 0.3)         | <0.001  |
| 12-month change                                         | 0.6 (0.6 to 0.6)    | 0.4 (0.4 to 0.4)    | 0.2 (0.1 to 0.2)         | <0.001  |
| <b>PUFA (%E)</b>                                        |                     |                     |                          |         |
| Baseline, mean (SD)                                     | 6.4 (1.9)           | 6.4 (1.8)           |                          |         |
| 6-month change                                          | 1.1 (1.1 to 1.2)    | 0.7 (0.6 to 0.7)    | 0.5 (0.4 to 0.5)         | <0.001  |
| 12-month change                                         | 1.1 (1.0 to 1.2)    | 0.7 (0.7 to 0.8)    | 0.4 (0.3 to 0.5)         | <0.001  |
| <b>Total alcohol (%E)</b>                               |                     |                     |                          |         |
| Baseline, median (IQR)                                  | 1 (0, 4)            | 2 (0, 4)            |                          |         |
| 6-month change                                          | -0.3 (-0.4 to -0.2) | -0.1 (-0.2 to 0)    | -0.2 (-0.3 to 0)         | 0.02    |
| 12-month change                                         | -0.2 (-0.3 to -0.1) | 0 (-0.1 to 0.1)     | -0.2 (-0.3 to -0.1)      | 0.01    |
| <b>Fiber (g/week)</b>                                   |                     |                     |                          |         |
| Baseline, mean (SD)                                     | 184 (63)            | 182 (60)            |                          |         |
| 6-month change                                          | 35 (33 to 37)       | 14 (12 to 16)       | 21 (18 to 24)            | <0.001  |
| 12-month change                                         | 32 (30 to 34)       | 16 (14 to 18)       | 16 (13 to 19)            | <0.001  |
| <b>Long chain w-3 fatty acids (g/week)</b>              |                     |                     |                          |         |
| Baseline, median (IQR)                                  | 5 (4, 9)            | 5 (4, 9)            |                          |         |
| 6-month change                                          | 0.9 (0.8 to 1.1)    | 0.4 (0.3 to 0.5)    | 0.6 (0.4 to 0.7)         | <0.001  |
| 12-month change                                         | 0.9 (0.8 to 1.1)    | 0.4 (0.3 to 0.5)    | 0.6 (0.4 to 0.7)         | <0.001  |
| <b>Cholesterol (mg/week)</b>                            |                     |                     |                          |         |
| Baseline, mean (SD)                                     | 2,651 (793)         | 2,687 (825)         |                          |         |
| 6-month change                                          | -191 (-216 to -166) | -147 (-172 to -122) | -44 (-79 to -8)          | 0.02    |
| 12-month change                                         | -187 (-213 to -162) | -182 (-207 to -157) | -6 (-41 to 30)           | 0.75    |
| <b>Sodium (g/week)</b>                                  |                     |                     |                          |         |
| Baseline, median (IQR)                                  | 22.2 (17.9, 27.1)   | 22.2 (17.9, 27.4)   |                          |         |
| 6-month change                                          | -2.7 (-2.9 to -2.5) | -1.6 (-1.8 to -1.4) | -1.1 (-1.4 to -0.8)      | <0.001  |
| 12-month change                                         | -2.8 (-3.0 to -2.6) | -1.7 (-1.9 to -1.4) | -1.1 (-1.4 to -0.8)      | <0.001  |

Baseline data are means (SD) or median (IQR)

E, energy; SFA, saturated fatty acids; MUFA, monounsaturated fatty acids; PUFA, polyunsaturated fatty acids; w-3, omega-3

6-month and 12-month change are means (95% CI) calculated using mixed effect models taking into account site and intra-cluster correlations (couples) as random factors.

**Supplemental eTable 9. Baseline and 12- month change (95% confidence intervals) in risk factors, by treatment group: all randomized participants (multiple imputation [MI]) and completers only.**

| Variable                          | MULTIPLE IMPUTATION: all randomized participants |                     |                          |         | COMPLETERS ONLY     |                     |                          |         |
|-----------------------------------|--------------------------------------------------|---------------------|--------------------------|---------|---------------------|---------------------|--------------------------|---------|
|                                   | Intervention group                               | Control group       | Between-group difference |         | Intervention group  | Control group       | Between-group difference |         |
|                                   | n=3,272                                          | n=3,311             |                          | p value | n=2,840             | n=2,946             |                          | p value |
| <b>Weight, (kg)</b>               |                                                  |                     |                          |         |                     |                     |                          |         |
| Baseline, mean (SD)               | 86.5 (12.9)                                      | 86.3 (13.0)         |                          |         | 86.5 (12.9)         | 86.3 (13)           |                          |         |
| 12-month change                   | -3.6 (-3.9 to -3.4)                              | -0.8 (-1.0 to -0.5) | -2.9 (-3.2 to -2.6)      | <0.001  | -3.8 (-4.1 to -3.6) | -0.8 (-1.0 to -0.5) | -3.1 (-3.4 to -2.7)      | <0.001  |
| <b>Waist, (cm)</b>                |                                                  |                     |                          |         |                     |                     |                          |         |
| Baseline, mean (SD)               | 108 (9.6)                                        | 108 (9.7)           |                          |         | 107 (9.6)           | 108 (9.7)           |                          |         |
| 12-month change                   | -4.4 (-4.6 to -4.1)                              | -1.1 (-1.3 to -0.9) | -3.3 (-3.6 to -2.9)      | <0.001  | -4.4 (-4.7 to -4.2) | -1.1 (-1.3 to -0.9) | -3.3 (-3.7 to -3.0)      | <0.001  |
| <b>BMI, (kg/m<sup>2</sup>)</b>    |                                                  |                     |                          |         |                     |                     |                          |         |
| Baseline, mean (SD)               | 32.6 (3.4)                                       | 32.6 (3.5)          |                          |         | 32.5 (3.4)          | 32.5 (3.5)          |                          |         |
| 12-month change                   | -1.4 (-1.4 to -1.3)                              | -0.3 (-0.3 to -0.2) | -1.1 (-1.2 to -1.0)      | <0.001  | -1.4 (-1.5 to -1.3) | -0.3 (-0.4 to -0.2) | -1.1 (-1.3 to -1.0)      | <0.001  |
| <b>Serum cholesterol, (mg/dL)</b> |                                                  |                     |                          |         |                     |                     |                          |         |
| Baseline, mean (SD)               | 197 (37.5)                                       | 197 (37.7)          |                          |         | 196 (37)            | 197 (37.6)          |                          |         |
| 12-month change                   | -3.0 (-4.2 to -1.7)                              | -1.8 (-3.1 to -0.6) | -1.1 (-2.9 to 0.7)       | 0.23    | -2.9 (-4.2 to -1.7) | -1.9 (-3.1 to -0.6) | -1.1 (-2.8 to 0.7)       | 0.24    |
| <b>LDL-c, (mg/dL)</b>             |                                                  |                     |                          |         |                     |                     |                          |         |
| Baseline, mean (SD)               | 121 (32.2)                                       | 121 (32.2)          |                          |         | 120 (32)            | 121 (32.1)          |                          |         |
| 12-month change                   | -2.9 (-4.0 to -1.8)                              | -2.3 (-3.4 to -1.2) | -0.6 (-2.2 to 1.0)       | 0.48    | -2.9 (-4.0 to -1.8) | -2.3 (-3.4 to -1.2) | -0.6 (-2.2 to 1.0)       | 0.45    |
| <b>HDL-c, (mg/dL)</b>             |                                                  |                     |                          |         |                     |                     |                          |         |
| Baseline, mean (SD)               | 48 (11.8)                                        | 48 (11.7)           |                          |         | 48 (11.9)           | 48 (11.7)           |                          |         |
| 12-month change                   | 2.0 (1.7 to 2.3)                                 | 0.9 (0.6 to 1.2)    | 1.1 (0.7 to 1.6)         | <0.001  | 2.2 (1.8 to 2.5)    | 0.9 (0.6 to 1.2)    | 1.3 (0.8 to 1.7)         | <0.001  |

**Supplemental eTable 9 (cont.). Baseline and 12- month change (95% confidence intervals) in risk factors, by treatment group: all randomized participants (multiple imputation [MI]) and completers only.**

| Variable                       | MULTIPLE IMPUTATION: all randomized participants |                     |                          |         | COMPLETERS ONLY        |                     |                          |         |
|--------------------------------|--------------------------------------------------|---------------------|--------------------------|---------|------------------------|---------------------|--------------------------|---------|
|                                | Intervention group                               | Control group       | Between-group difference |         | Intervention group     | Control group       | Between-group difference |         |
|                                | n=3,272                                          | n=3,311             |                          | p value | n=2,840                | n=2,946             |                          | p value |
| <b>NonHDL-c, (mg/dL)</b>       |                                                  |                     |                          |         |                        |                     |                          |         |
| Baseline, mean (SD)            | 149 (35.1)                                       | 149 (35.1)          |                          |         | 148 (34.7)             | 149 (34.9)          |                          |         |
| 12-month change                | -4.9 (-6.0 to -3.7)                              | -2.9 (-4.1 to -1.7) | -1.9 (-3.6 to -0.3)      | 0.02    | -5.2 (-6.4 to -4.0)    | -2.7 (-3.9 to -1.6) | -2.5 (-4.2 to -0.8)      | 0.004   |
| <b>Ratio Cholesterol:HDL-c</b> |                                                  |                     |                          |         |                        |                     |                          |         |
| Baseline, mean (SD)            | 4.3 (1.1)                                        | 4.2 (1)             |                          |         | 4.3 (1.1)              | 4.2 (1)             |                          |         |
| 12-month change                | -0.2 (-0.3 to -0.2)                              | -0.1 (-0.1 to -0.1) | -0.1 (-0.2 to -0.1)      | <0.001  | -0.3 (-0.3 to -0.2)    | -0.1 (-0.1 to -0.1) | -0.1 (-0.2 to -0.1)      | <0.001  |
| <b>Triglycerides, (mg/dl)</b>  |                                                  |                     |                          |         |                        |                     |                          |         |
| Baseline, mean (SD)            | 151 (76.4)                                       | 153 (78.3)          |                          |         | 148 (72.4)             | 150 (74.1)          |                          |         |
| 12-month change                | -12.8 (-15.4 to -10.3)                           | -2.9 (-5.4 to -0.4) | -9.9 (-13.6 to -6.3)     | <0.001  | -14.6 (-17.2 to -12.1) | -4.2 (-6.7 to -1.7) | -10.4 (-14 to -6.9)      | <0.001  |
| <b>SBP, (mmHg)</b>             |                                                  |                     |                          |         |                        |                     |                          |         |
| Baseline, mean (SD)            | 140 (17.1)                                       | 139 (16.6)          |                          |         | 139 (17.1)             | 139 (16.6)          |                          |         |
| 12-month change                | -4.1 (-4.7 to -3.5)                              | -2.2 (-2.8 to -1.7) | -1.9 (-2.7 to -1.1)      | <0.001  | -3.9 (-4.5 to -3.3)    | -2.2 (-2.7 to -1.6) | -1.7 (-2.6 to -0.9)      | <0.001  |
| <b>DBP, (mmHg)</b>             |                                                  |                     |                          |         |                        |                     |                          |         |
| Baseline, mean (SD)            | 81 (10)                                          | 81 (9.8)            |                          |         | 81 (9.9)               | 81 (9.7)            |                          |         |
| 12-month change                | -2.4 (-2.8 to -2.1)                              | -1.5 (-1.8 to -1.2) | -1 (-1.4 to -0.5)        | <0.001  | -2.5 (-2.8 to -2.2)    | -1.5 (-1.8 to -1.2) | -1.0 (-1.5 to -0.6)      | <0.001  |

MI, Multiple imputation; BMI, Body mass index; LDL-c, Low density lipoprotein cholesterol; HDL-c, High density lipoprotein cholesterol; SBP, systolic blood pressure; DBP, diastolic blood pressure.

Multiple imputation (using chained equations with the following predictors: Intervention group, sex, age at baseline, smoking status, educational level, physical activity, baseline BMI, total energy intake and the baseline value of the variable that will be imputed.)

% of imputed values: body mass index: 5%, body weight: 4.7%, waist circumference: 9.4%, serum cholesterol: 10.1%, HDL-c: 10.8%, LDL-c: 10.9%, nonHDL-c: 10.9% ratio cholesterol: HDL: 10.9%, triglycerides: 10.3%, systolic blood pressure: 6.1% and diastolic blood pressure: 6.2%

Baseline data are means (SD). 12-month change are means (95% CI) calculated using mixed effect models taking into account site and intra-cluster correlations (couples) as random factors. Conversion factors to obtain mmol/L: Cholesterol mg/dL, HDL-c and LDL-c x 0.0259; triglycerides mg/dL x 0.0113.



**Supplemental eFigure 1. Mean values (95% CI) of scores capturing the 4 quality dietary patterns at baseline, at 6 months and at 12 months according to the randomized treatment group.**

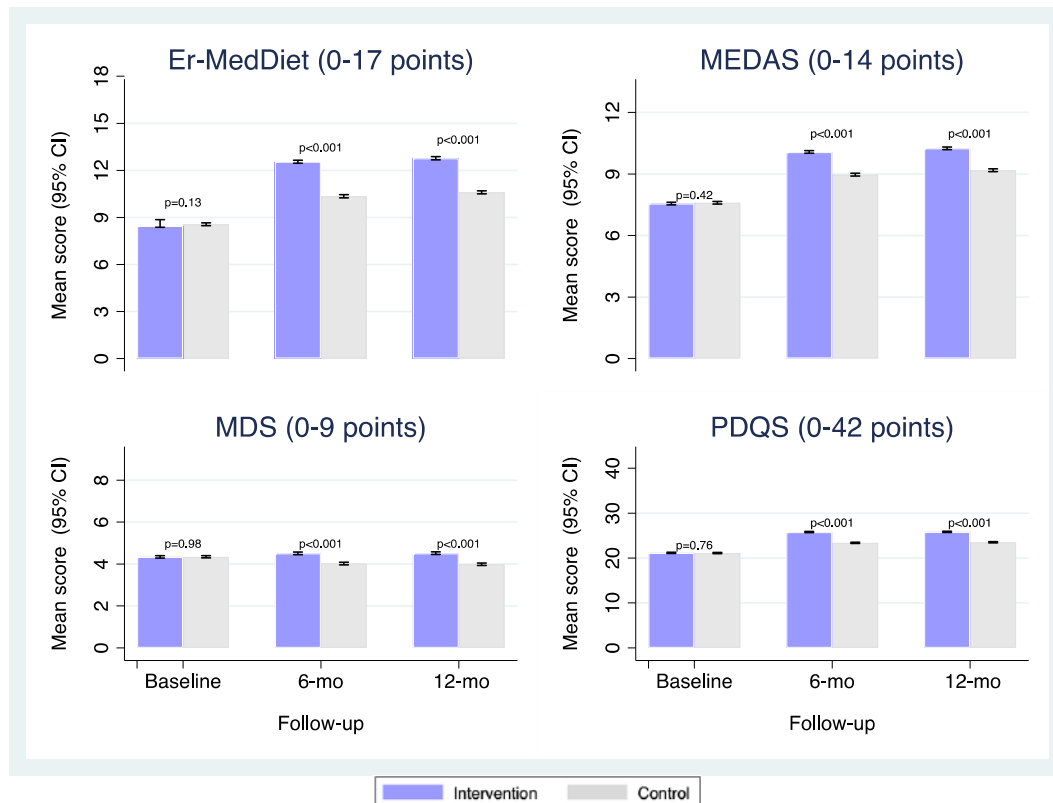

Er-MedDiet, Energy reduced Mediterranean Diet; MDS, Mediterranean Diet Score, MEDAS, Mediterranean Diet Adherence Screener; PDQS, Prime Diet Quality Score.

The direction of all 4 food patterns is the same: a higher score means a higher quality of the overall dietary pattern. The possible ranges were 0-17 for er-MedDiet, 0-9 for the MDS, 0-14 for MEDAS, and 0-42 for PDQS, Prime Diet Quality Score.

The p values shown in the graphs correspond to the comparisons of means between intervention and control groups.

**Supplemental eFigure 2. Percentage of participants complying with the intended dietary changes after 12 months by randomized treatment group.**

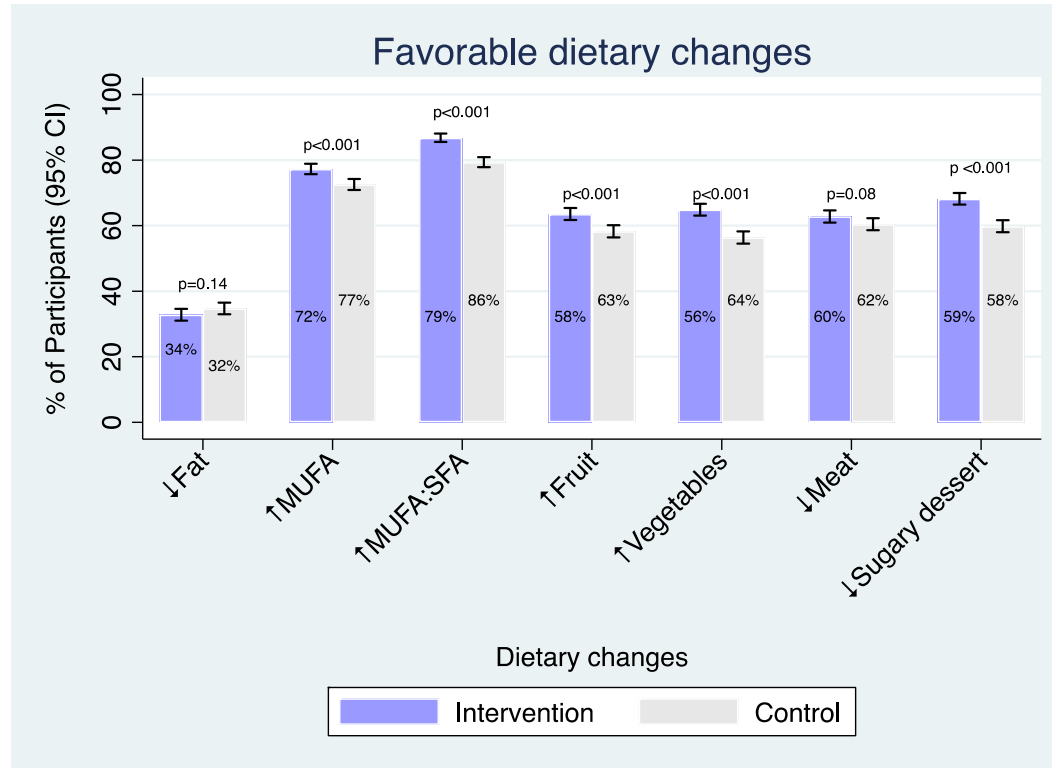

MUFA, monounsaturated fatty acids; MUFA:SFA, ratio monounsaturated and saturated fatty acids.

The p values shown in the graphs correspond to the comparisons of proportions between intervention and control groups.

**Supplemental eFigure 3 Changes in nutritional variables (expressed in common units of baseline standard deviations) after 6 and 12 months in the control and in the intervention group.**

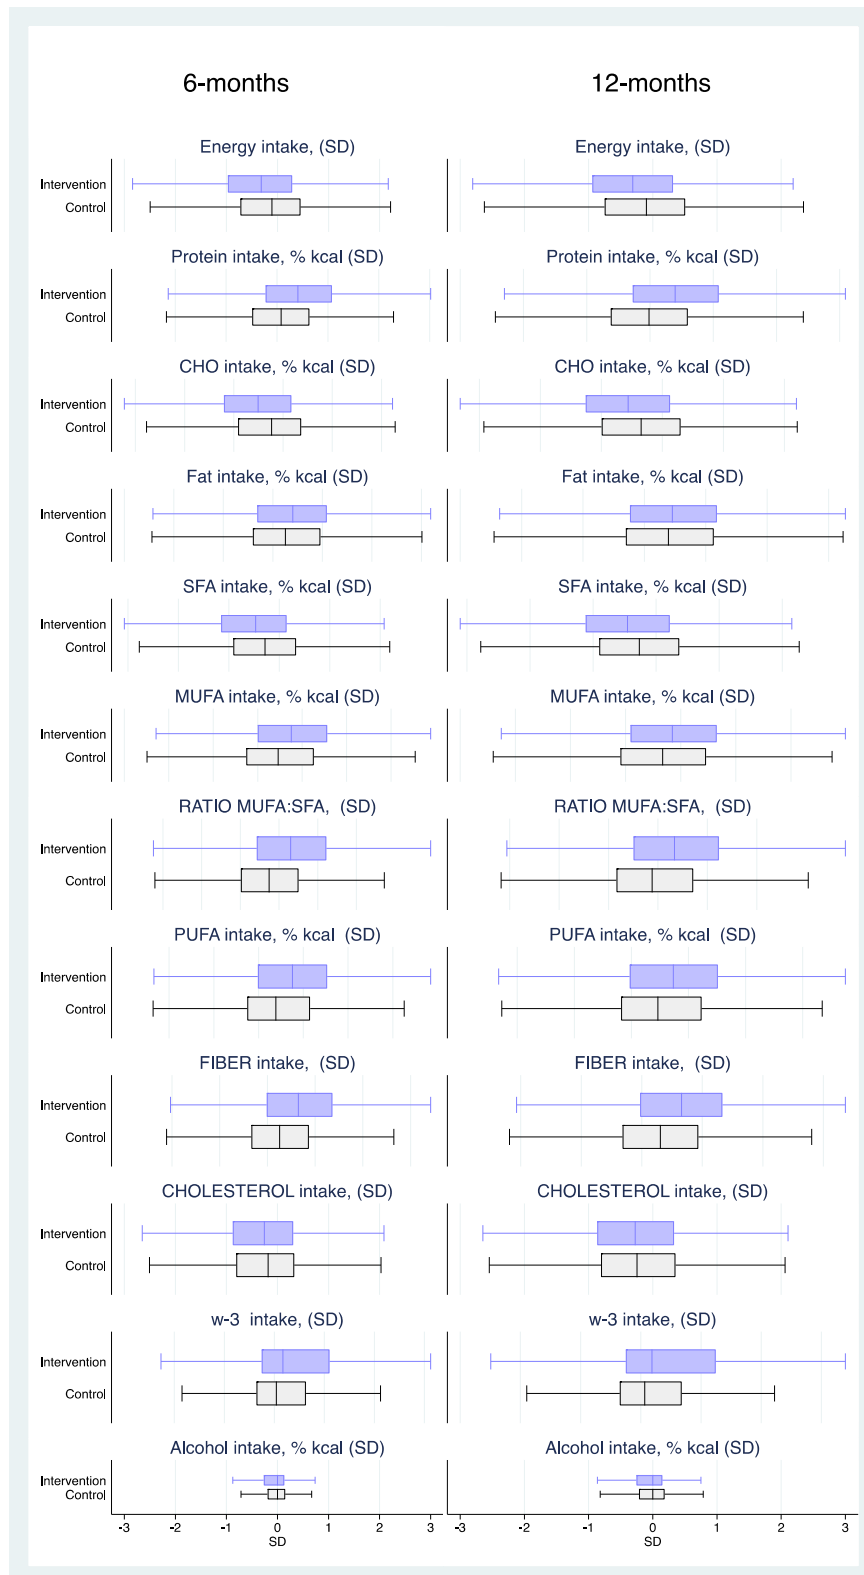

CHO, carbohydrates; SFA, Saturated fatty acid; MUFA, monounsaturated fatty acid, PUFA, polyunsaturated fatty acid; w-3, long chain omega-3 fatty acid

### **Additional affiliations of authors:**

- **University of Navarra, Department of Preventive Medicine and Public Health, IDISNA, Pamplona, Spain:**  
*Sayón-Orea C, Razquin C, Ruiz-Canela M, Garcia-Arellano A, Toledo E, Martinez-Gonzalez MA.*
- **Navarra Regional Health Service, Pamplona, Spain:**  
*Garcia-Arellano A.*
- **Harvard TH Chan School of Public Health, Department of Nutrition, Boston, USA:**  
*Martinez-Gonzalez MA*
- **University Rovira & Virgili, Department of Biochemistry/Biotechnology, Nutrition Unit, Reus, Spain:**  
*Bullo M, Basora J, Diaz-Lopez A, Salas-Salvado J*
- **University Hospital of Sant Joan de Reus, Nutrition Unit, Reus, Spain & Institute of Health Investigation Pere Virgili (IISPV), Reus, Spain:**  
*Salas-Salvado J*
- **Department of Preventive Medicine, University of Valencia, Valencia, Spain:**  
*Corella D, Sorli JV, Asensio EM*
- **Unit of Cardiovascular Risk and Nutrition, Institute Hospital del Mar of Medical Research, Municipal Institute of Medical Investigation (IMIM), Barcelona, Spain:**  
*Fito M, Castañer O, Schröder H, Goday A*
- **Health Research Institute of the Balearic Islands (IdISBa), Palma de Mallorca, Spain:**  
*Romaguera D, Fiol M, Moñino M*
- **Miguel Hernandez University, ISABIAL-FISABIO, Alicante, Spain:**  
*Vioque J, Navarrete EM, Garcia de la Hera M*
- **Department of Cardiology (OSI) ARABA, University Hospital Araba, University of the Basque Country UPV/EHU, Vitoria-Gasteiz, Spain:**  
*Alonso-Gomez AM, Aros F, Tojal-Sierra L*
- **Department of Nursing, School of Health Sciences, Málaga, Spain:**  
*Wärnberg J*
- **University of Navarra, Department of Nutrition, Food Sciences, and Physiology, Center for Nutrition Research, Pamplona, Spain:**  
*Martinez JA, Zulet M*
- **Nutritional Genomics and Epigenomics Group, IMDEA Food, CEI UAM + CSIC Madrid, Spain:**  
*Martinez JA, Daimiel L*
- **Nutrition Research Group, Research Institute of Biomedical and Health Sciences (IUIBS), University of Las Palmas de Gran Canaria, Las Palmas de Gran Canaria, Spain:**  
*Serra-Majem L, Sanchez-Villegas A*
- **Department of Internal Medicine, IDIBAPS, Hospital Clinic, University of Barcelona, Barcelona, Spain:**  
*Estruch R, Casas R*
- **Virgen de la Victoria Hospital, Department of Endocrinology, Málaga, Spain:**

*Tinahones FJ, Bernal-Lopez R*

- **Biomedical Research Institute of Málaga (IBIMA). University of Málaga, Málaga, Spain:**

*Tinahones FJ, Bernal-Lopez R, Wärnberg J*

- **Department of Family Medicine, Research Unit, Primary Care District of Sevilla, Sevilla, Spain:**

*Lapetra J, Santos-Lozano JM*

- **Lipids and Vascular Risk Unit, Internal Medicine, University Hospital Bellvitge, Hospitalet de Llobregat, Barcelona, Spain:**

*Pinto X, Corbella E*

- **Research Group on Community Nutrition & Oxidative Stress, University of Balearic Islands, Palma de Mallorca, Spain:**

*Tur JA, Bouzas C*

- **Department of Internal Medicine, Maimonides Biomedical Research Institute of Cordoba (IMIBIC), Reina Sofia University Hospital, University of Cordoba, Cordoba, Spain:**

*Lopez-Miranda J*

- **Department of Preventive Medicine and Public Health, University of Granada, Granada, Spain:**

*Bueno-Cavanillas A*

- **Division of Preventive Medicine, Faculty of Medicine, University of Jaén, Jaén, Spain:**

*Delgado-Rodriguez M*

- **Department of Endocrinology and Nutrition, Biomedical Research Institute of Hospital Clínico San Carlos (IdISSC), Madrid, Spain:**

*Matia-Martin P*

- **Institute of Biomedicine (IBIOMED), University of León, León, Spain:**

*Martin V*

- **Department of Endocrinology and Nutrition, IDIBAPS, Hospital Clinic, University of Barcelona, Barcelona, Spain:**

*Vidal J, Ros E*

- **Department of Endocrinology, Foundation Jiménez-Díaz, Madrid, Spain:**

*Vazquez C*

- **University of Malaga, Department of Preventive Medicine, Malaga, Spain:**

*Gomez-Gracia E*
