# Supplementary material
Source: PubMed Central journal article supplement (PMC6802271)
Supplement: jama-322-1486-s004.pdf [file jama-322-1486-s004.pdf]

## Data Sharing Statement

### Data

**Data available:** Yes

**Data types:** Deidentified participant data

**How to access data:** There are restrictions on the availability of data for the PREDIMED-Plus study, due to the signed consent agreements around data sharing, which only allow access to external researchers for research following the project purposes. Requestors wishing to access the PREDIMED-Plus trial data used in this study can request it to the PREDIMED-Plus trial Steering Committee:

[predimed\\_plus\\_scommittee@googlegroups.com](mailto:predimed_plus_scommittee@googlegroups.com).

**When available:** With publication

### Supporting Documents

**Document types:** None

### Additional Information

**Who can access the data:** to external researchers for research following the project purposes. Requestors wishing to access the PREDIMED-Plus trial data used in this study can request it to the PREDIMED-Plus trial Steering Committee:

[predimed\\_plus\\_scommittee@googlegroups.com](mailto:predimed_plus_scommittee@googlegroups.com).

**Types of analyses:** Specified purpose

**Mechanisms of data availability:** after approval of a proposal
